# Supplementary material for: Transcriptome-Wide Analysis of Messenger RNA Decay in Normal and Osteoarthritic Human Articular Chondrocytes
Source: PubMed Central journal article supplement (PMC4233952; doi:10.1002/art.38849), 2014-10-26
Supplement: art0066-3052-sd1.pdf [file art0066-3052-sd1.pdf]

Tew et al: Transcriptome-wide analysis of mRNA decay in normal and osteoarthritic human articular chondrocytes

### **Supplemental Data 1**

This file contains four tab of data (in addition to this tab) which each have lists of genes that show significant (FDR < 0.05) up or down regulation between normal chondrocytes and chondrocytes from either intact or fibrillated tissue

The comparison is indicated by the header to the right.

#### **Explanation of column names:**

Illumina ID

Mean(Normal) = log<sub>10</sub> mean expression level

Mean(Intact/Fibrillated) = log<sub>10</sub> mean expression level

LogRatio

FoldChng = unlogged fold change in expression

FDR = False Discovery Rate value

Symbol = Official Gene Symbol

| <u>Illumina ID</u> | <u>Mean(Normal)</u> | <u>Mean(Intact)</u> | <u>LogRatio</u> | <u>FoldChng</u> | <u>FDR</u> | <u>Symbol</u> |
|--------------------|---------------------|---------------------|-----------------|-----------------|------------|---------------|
| ILMN_1699651       | 2.611               | 3.995               | -1.384          | 24.22           | 1.50E-03   | IL6           |
| ILMN_1665865       | 2.590               | 3.640               | -1.050          | 11.21           | 8.30E-03   | IGFBP4        |
| ILMN_1768425       | 2.436               | 3.287               | -0.851          | 7.10            | 1.56E-02   | TF            |
| ILMN_1763837       | 1.980               | 2.748               | -0.768          | 5.86            | 0.00E+00   | ANPEP         |
| ILMN_1785732       | 3.364               | 4.120               | -0.756          | 5.70            | 4.72E-02   | TNFAIP6       |
| ILMN_2169152       | 2.832               | 3.568               | -0.736          | 5.44            | 2.80E-03   | SRGN          |
| ILMN_1760347       | 2.888               | 3.621               | -0.733          | 5.40            | 4.00E-04   | SRGN          |
| ILMN_1748538       | 2.805               | 3.535               | -0.730          | 5.37            | 0.00E+00   | ALDH1A2       |
| ILMN_1738116       | 1.898               | 2.613               | -0.715          | 5.19            | 1.00E-04   | TMEM119       |
| ILMN_2167758       | 2.440               | 3.135               | -0.695          | 4.96            | 7.10E-03   | CILP          |
| ILMN_1746013       | 2.551               | 3.224               | -0.673          | 4.71            | 1.00E-04   | SPOCK1        |
| ILMN_1723847       | 3.401               | 4.055               | -0.654          | 4.51            | 5.00E-04   | CILP          |
| ILMN_1701308       | 2.307               | 2.957               | -0.650          | 4.46            | 3.57E-02   | COL1A1        |
| ILMN_2398159       | 2.597               | 3.224               | -0.628          | 4.24            | 4.50E-03   | DKK3          |
| ILMN_1685433       | 1.953               | 2.575               | -0.622          | 4.18            | 3.30E-03   | COL8A1        |
| ILMN_2383707       | 2.221               | 2.841               | -0.620          | 4.17            | 0.00E+00   | ALDH1A2       |
| ILMN_1800317       | 1.814               | 2.421               | -0.607          | 4.05            | 2.80E-02   | WNT5A         |
| ILMN_1815673       | 2.519               | 3.099               | -0.580          | 3.80            | 3.39E-02   | DKK3          |
| ILMN_1688780       | 3.339               | 3.899               | -0.560          | 3.63            | 0.00E+00   | S100A4        |
| ILMN_1662619       | 2.155               | 2.687               | -0.532          | 3.40            | 4.51E-02   | TFPI          |
| ILMN_1813704       | 2.788               | 3.312               | -0.525          | 3.35            | 2.21E-02   | KIAA1199      |
| ILMN_1813341       | 2.068               | 2.585               | -0.517          | 3.29            | 1.00E-04   | PTGFR         |
| ILMN_1671142       | 2.250               | 2.763               | -0.513          | 3.26            | 1.40E-03   | GPR68         |
| ILMN_1673566       | 2.669               | 3.175               | -0.506          | 3.20            | 1.80E-02   | ADAMTS1       |
| ILMN_1684306       | 3.325               | 3.823               | -0.497          | 3.14            | 0.00E+00   | S100A4        |
| ILMN_1734611       | 2.136               | 2.625               | -0.489          | 3.09            | 3.84E-02   | BDKRB1        |
| ILMN_1656057       | 2.145               | 2.631               | -0.486          | 3.06            | 0.00E+00   | PLAU          |
| ILMN_1736078       | 2.631               | 3.110               | -0.479          | 3.01            | 3.57E-02   | THBS4         |
| ILMN_1660031       | 2.258               | 2.729               | -0.471          | 2.96            | 3.62E-02   | P2RY6         |
| ILMN_1676563       | 3.642               | 4.109               | -0.467          | 2.93            | 2.14E-02   | HTRA1         |
| ILMN_1675797       | 2.328               | 2.791               | -0.463          | 2.91            | 0.00E+00   | EPDR1         |
| ILMN_1792455       | 2.681               | 3.128               | -0.446          | 2.80            | 1.60E-02   | TMEM158       |
| ILMN_2325763       | 2.622               | 3.067               | -0.445          | 2.79            | 2.29E-02   | VCAM1         |
| ILMN_2402392       | 1.943               | 2.375               | -0.433          | 2.71            | 2.20E-02   | COL8A1        |
| ILMN_1670926       | 2.469               | 2.900               | -0.430          | 2.69            | 3.80E-03   | CHST15        |
| ILMN_1658384       | 3.749               | 4.176               | -0.427          | 2.67            | 1.40E-03   | CRTAC1        |
| ILMN_1782938       | 2.322               | 2.745               | -0.423          | 2.65            | 3.00E-04   | SLC16A10      |
| ILMN_1713499       | 2.449               | 2.872               | -0.422          | 2.64            | 2.22E-02   | WISP1         |
| ILMN_1910180       | 2.729               | 3.148               | -0.420          | 2.63            | 7.00E-04   |               |
| ILMN_1740015       | 2.460               | 2.878               | -0.418          | 2.62            | 9.50E-03   | CD14          |
| ILMN_2395652       | 2.073               | 2.475               | -0.402          | 2.52            | 1.00E-04   | PTGFR         |
| ILMN_1802780       | 1.822               | 2.216               | -0.394          | 2.48            | 8.00E-04   | M160          |
| ILMN_2307903       | 3.781               | 4.171               | -0.389          | 2.45            | 1.29E-02   | VCAM1         |
| ILMN_1656938       | 2.341               | 2.730               | -0.389          | 2.45            | 4.80E-02   | LOC731486     |
| ILMN_3245564       | 1.860               | 2.248               | -0.389          | 2.45            | 0.00E+00   | RICH2         |
| ILMN_1681515       | 2.425               | 2.811               | -0.386          | 2.43            | 5.90E-03   | CRLF1         |
| ILMN_1732921       | 2.018               | 2.404               | -0.386          | 2.43            | 4.00E-04   | ITGB8         |
| ILMN_1705750       | 3.612               | 3.997               | -0.385          | 2.43            | 1.55E-02   | TGM2          |
| ILMN_1691892       | 2.419               | 2.804               | -0.385          | 2.43            | 0.00E+00   | TAGLN2        |
| ILMN_1761858       | 1.974               | 2.359               | -0.385          | 2.43            | 2.20E-03   | MID1          |
| ILMN_2090105       | 3.229               | 3.612               | -0.383          | 2.41            | 6.00E-04   | TAGLN2        |
| ILMN_2396444       | 3.073               | 3.454               | -0.381          | 2.40            | 2.21E-02   | CD14          |
| ILMN_1696048       | 2.671               | 3.050               | -0.379          | 2.39            | 2.77E-02   | C13orf33      |
| ILMN_2385672       | 1.987               | 2.363               | -0.376          | 2.38            | 1.10E-02   | ELN           |
| ILMN_1801710       | 2.015               | 2.390               | -0.376          | 2.38            | 1.01E-02   | APBB1IP       |
| ILMN_1800787       | 2.139               | 2.512               | -0.373          | 2.36            | 3.28E-02   | RFTN1         |
| ILMN_1760778       | 2.998               | 3.365               | -0.367          | 2.33            | 8.30E-03   | ENG           |

## Increased in Intact OA vs. Normal

|              |       |       |        |      |          |              |
|--------------|-------|-------|--------|------|----------|--------------|
| ILMN_1702973 | 1.896 | 2.259 | -0.363 | 2.31 | 4.30E-03 | TMEM166      |
| ILMN_1727671 | 2.251 | 2.608 | -0.356 | 2.27 | 6.60E-03 | SSH1         |
| ILMN_1717934 | 2.245 | 2.598 | -0.353 | 2.26 | 0.00E+00 | SYT11        |
| ILMN_1758672 | 2.551 | 2.901 | -0.350 | 2.24 | 1.90E-03 | FAM107B      |
| ILMN_1701643 | 2.223 | 2.567 | -0.345 | 2.21 | 4.14E-02 | GDPD5        |
| ILMN_1746465 | 2.399 | 2.743 | -0.345 | 2.21 | 2.51E-02 | FJX1         |
| ILMN_1680132 | 2.007 | 2.349 | -0.342 | 2.20 | 1.00E-04 | CADM1        |
| ILMN_1690939 | 2.097 | 2.430 | -0.333 | 2.15 | 4.79E-02 | ECGF1        |
| ILMN_1815745 | 2.523 | 2.851 | -0.328 | 2.13 | 3.13E-02 | SOX4         |
| ILMN_2394250 | 2.662 | 2.988 | -0.326 | 2.12 | 1.40E-03 | PLEKHA1      |
| ILMN_1773389 | 2.225 | 2.549 | -0.324 | 2.11 | 2.84E-02 | PLTP         |
| ILMN_1780334 | 1.995 | 2.314 | -0.319 | 2.08 | 2.20E-03 | KCNJ2        |
| ILMN_1779228 | 1.784 | 2.102 | -0.319 | 2.08 | 2.80E-03 | CDH2         |
| ILMN_1912737 | 2.183 | 2.497 | -0.314 | 2.06 | 4.30E-03 |              |
| ILMN_1766539 | 2.325 | 2.636 | -0.311 | 2.05 | 1.30E-03 | LOC643319    |
| ILMN_1873621 | 2.802 | 3.111 | -0.310 | 2.04 | 1.04E-02 | NTN1         |
| ILMN_2062468 | 3.217 | 3.527 | -0.310 | 2.04 | 8.60E-03 | IGFBP7       |
| ILMN_2383305 | 2.797 | 3.104 | -0.307 | 2.03 | 5.40E-03 | GPATCH4      |
| ILMN_2309156 | 2.463 | 2.769 | -0.307 | 2.03 | 1.70E-03 | PMEPA1       |
| ILMN_1655884 | 2.712 | 3.018 | -0.306 | 2.03 | 4.90E-03 | ATP2A2       |
| ILMN_1714700 | 2.381 | 2.686 | -0.306 | 2.02 | 1.30E-03 | TRIB2        |
| ILMN_1811468 | 2.019 | 2.317 | -0.298 | 1.99 | 5.90E-03 | IRX3         |
| ILMN_1741054 | 2.663 | 2.960 | -0.297 | 1.98 | 1.64E-02 | SLC5A6       |
| ILMN_1851610 | 1.883 | 2.175 | -0.292 | 1.96 | 0.00E+00 |              |
| ILMN_1677432 | 2.191 | 2.483 | -0.292 | 1.96 | 2.40E-02 | SRGAP1       |
| ILMN_1656300 | 2.170 | 2.462 | -0.292 | 1.96 | 2.52E-02 | GFRA2        |
| ILMN_1789510 | 2.951 | 3.242 | -0.291 | 1.95 | 5.80E-03 | STIP1        |
| ILMN_1681886 | 2.204 | 2.494 | -0.291 | 1.95 | 3.00E-03 | ADAMTS5      |
| ILMN_1787265 | 2.854 | 3.144 | -0.290 | 1.95 | 1.23E-02 | ZNF503       |
| ILMN_1669631 | 2.083 | 2.372 | -0.289 | 1.95 | 1.60E-03 | GLRB         |
| ILMN_2065022 | 1.901 | 2.190 | -0.289 | 1.95 | 4.00E-04 | KIAA0672     |
| ILMN_1687440 | 2.369 | 2.657 | -0.288 | 1.94 | 8.70E-03 | HIPK2        |
| ILMN_2229877 | 1.907 | 2.194 | -0.288 | 1.94 | 1.16E-02 | PCDH18       |
| ILMN_2110252 | 2.764 | 3.051 | -0.287 | 1.94 | 3.05E-02 | NPM3         |
| ILMN_1712684 | 3.358 | 3.644 | -0.286 | 1.93 | 8.30E-03 | FAM20C       |
| ILMN_2366041 | 3.029 | 3.315 | -0.286 | 1.93 | 2.76E-02 | ITM2C        |
| ILMN_1774823 | 2.888 | 3.171 | -0.284 | 1.92 | 1.54E-02 | RPL34        |
| ILMN_1665736 | 3.175 | 3.456 | -0.282 | 1.91 | 1.39E-02 | LOC648024    |
| ILMN_3244611 | 2.274 | 2.554 | -0.280 | 1.90 | 1.56E-02 | LOC100132060 |
| ILMN_1678692 | 2.382 | 2.659 | -0.277 | 1.89 | 1.10E-02 | MPRIP        |
| ILMN_1683271 | 3.771 | 4.046 | -0.275 | 1.88 | 1.60E-03 | TMSB4X       |
| ILMN_1656628 | 2.815 | 3.089 | -0.274 | 1.88 | 1.97E-02 | WDR4         |
| ILMN_1692077 | 2.116 | 2.388 | -0.272 | 1.87 | 6.40E-03 | MXRA7        |
| ILMN_1798172 | 2.552 | 2.821 | -0.269 | 1.86 | 1.16E-02 | IPO4         |
| ILMN_1674183 | 2.077 | 2.344 | -0.267 | 1.85 | 4.34E-02 | MT1JP        |
| ILMN_1717490 | 2.606 | 2.873 | -0.267 | 1.85 | 3.96E-02 | RPL6         |
| ILMN_1767253 | 2.448 | 2.714 | -0.266 | 1.85 | 1.25E-02 | RRP12        |
| ILMN_1848913 | 2.037 | 2.302 | -0.265 | 1.84 | 1.29E-02 |              |
| ILMN_1794392 | 3.117 | 3.381 | -0.264 | 1.84 | 2.03E-02 | DDX3X        |
| ILMN_1771051 | 2.392 | 2.655 | -0.262 | 1.83 | 3.62E-02 | RPL29        |
| ILMN_1676014 | 2.380 | 2.642 | -0.262 | 1.83 | 1.25E-02 | LOC728635    |
| ILMN_1654262 | 2.583 | 2.844 | -0.261 | 1.82 | 2.75E-02 | ZMAT3        |
| ILMN_3237632 | 2.828 | 3.087 | -0.259 | 1.82 | 3.04E-02 | NCLN         |
| ILMN_1811104 | 2.946 | 3.205 | -0.259 | 1.82 | 2.69E-02 | KTELC1       |
| ILMN_1757867 | 2.140 | 2.398 | -0.258 | 1.81 | 1.20E-02 | MTM          |
| ILMN_2129927 | 2.311 | 2.567 | -0.256 | 1.80 | 2.69E-02 | EXT1         |
| ILMN_2385220 | 2.506 | 2.761 | -0.255 | 1.80 | 1.98E-02 | DFFA         |
| ILMN_1696485 | 2.559 | 2.814 | -0.255 | 1.80 | 2.49E-02 | HNRNPAB      |

## Increased in Intact OA vs. Normal

|              |       |       |        |      |          |              |
|--------------|-------|-------|--------|------|----------|--------------|
| ILMN_1781999 | 2.337 | 2.592 | -0.255 | 1.80 | 1.59E-02 | ABCF2        |
| ILMN_1669362 | 3.474 | 3.729 | -0.255 | 1.80 | 1.47E-02 | IGFBP6       |
| ILMN_1741200 | 2.454 | 2.707 | -0.254 | 1.79 | 2.40E-02 | RFX5         |
| ILMN_1710740 | 2.058 | 2.312 | -0.254 | 1.79 | 1.25E-02 | C2           |
| ILMN_1809352 | 1.840 | 2.093 | -0.253 | 1.79 | 0.00E+00 | PRL          |
| ILMN_1785252 | 2.473 | 2.725 | -0.252 | 1.79 | 4.11E-02 | SLC26A6      |
| ILMN_1730794 | 2.119 | 2.370 | -0.251 | 1.78 | 4.40E-02 | SERTAD4      |
| ILMN_3242540 | 1.847 | 2.097 | -0.250 | 1.78 | 1.00E-04 | CD163L1      |
| ILMN_1756784 | 2.205 | 2.455 | -0.250 | 1.78 | 1.77E-02 | FREQ         |
| ILMN_1858599 | 2.209 | 2.458 | -0.249 | 1.77 | 1.98E-02 |              |
| ILMN_1812926 | 2.490 | 2.738 | -0.248 | 1.77 | 1.48E-02 | ANTXR2       |
| ILMN_1705908 | 2.871 | 3.118 | -0.247 | 1.77 | 4.56E-02 | RPL7L1       |
| ILMN_2315789 | 2.408 | 2.654 | -0.246 | 1.76 | 2.60E-02 | PTPRD        |
| ILMN_1795930 | 2.185 | 2.430 | -0.246 | 1.76 | 3.93E-02 | PTGER4       |
| ILMN_1774547 | 2.934 | 3.179 | -0.245 | 1.76 | 4.75E-02 | MPRIP        |
| ILMN_1795218 | 2.716 | 2.960 | -0.244 | 1.75 | 3.57E-02 | DHX30        |
| ILMN_1799814 | 2.520 | 2.764 | -0.244 | 1.75 | 3.05E-02 | WDR57        |
| ILMN_1727815 | 2.107 | 2.350 | -0.243 | 1.75 | 1.47E-02 | CFI          |
| ILMN_1809364 | 1.916 | 2.159 | -0.243 | 1.75 | 2.70E-03 | NTF3         |
| ILMN_1704305 | 2.778 | 3.019 | -0.241 | 1.74 | 4.72E-02 | NIP7         |
| ILMN_1744308 | 2.391 | 2.630 | -0.239 | 1.73 | 2.69E-02 | DHX33        |
| ILMN_1701933 | 1.975 | 2.214 | -0.239 | 1.73 | 7.40E-03 | SNCA         |
| ILMN_1735499 | 2.467 | 2.706 | -0.239 | 1.73 | 2.98E-02 | DCBLD2       |
| ILMN_2189222 | 2.429 | 2.667 | -0.239 | 1.73 | 4.68E-02 | KLHL8        |
| ILMN_1710885 | 3.798 | 4.034 | -0.236 | 1.72 | 1.30E-02 | LOC387867    |
| ILMN_1695485 | 2.053 | 2.289 | -0.236 | 1.72 | 2.20E-02 | C9orf109     |
| ILMN_1728024 | 2.323 | 2.557 | -0.234 | 1.71 | 2.79E-02 | TUBG1        |
| ILMN_1703487 | 3.066 | 3.299 | -0.232 | 1.71 | 4.68E-02 | LMO4         |
| ILMN_3206343 | 3.374 | 3.606 | -0.232 | 1.71 | 4.09E-02 | LOC644914    |
| ILMN_1738657 | 1.891 | 2.123 | -0.231 | 1.70 | 2.20E-03 | SATB2        |
| ILMN_1813379 | 1.904 | 2.132 | -0.228 | 1.69 | 1.03E-02 | TNFRSF9      |
| ILMN_1701243 | 2.334 | 2.562 | -0.227 | 1.69 | 4.14E-02 | C10orf2      |
| ILMN_2411745 | 2.493 | 2.720 | -0.227 | 1.69 | 4.17E-02 | EML1         |
| ILMN_1784113 | 2.126 | 2.350 | -0.224 | 1.67 | 3.04E-02 | NAT14        |
| ILMN_1665148 | 3.631 | 3.852 | -0.222 | 1.67 | 4.35E-02 | LOC648249    |
| ILMN_1801307 | 1.878 | 2.098 | -0.220 | 1.66 | 2.20E-03 | TNFSF10      |
| ILMN_1685834 | 1.978 | 2.197 | -0.219 | 1.65 | 4.94E-02 | AMPH         |
| ILMN_1672608 | 1.989 | 2.206 | -0.217 | 1.65 | 3.28E-02 | PPAP2B       |
| ILMN_1728218 | 1.893 | 2.109 | -0.216 | 1.65 | 2.80E-03 | RBPMS        |
| ILMN_1808590 | 1.987 | 2.202 | -0.214 | 1.64 | 1.59E-02 | GUCY1A3      |
| ILMN_1782275 | 1.936 | 2.146 | -0.210 | 1.62 | 2.92E-02 | P2RY6        |
| ILMN_1745599 | 1.906 | 2.112 | -0.206 | 1.61 | 6.40E-03 | LOC643977    |
| ILMN_3240900 | 1.851 | 2.056 | -0.206 | 1.61 | 1.30E-03 | LOC100134728 |
| ILMN_1675756 | 2.005 | 2.210 | -0.205 | 1.60 | 3.93E-02 | KCNJ15       |
| ILMN_1762095 | 1.882 | 2.085 | -0.203 | 1.60 | 6.70E-03 | TMTCC4       |
| ILMN_1797362 | 1.957 | 2.159 | -0.203 | 1.59 | 3.57E-02 | LIMK1        |
| ILMN_2233783 | 1.908 | 2.106 | -0.197 | 1.58 | 2.69E-02 | CD38         |
| ILMN_1666775 | 1.906 | 2.096 | -0.190 | 1.55 | 7.10E-03 | CACNA1C      |
| ILMN_1797764 | 1.935 | 2.115 | -0.180 | 1.51 | 2.98E-02 | RPL22L1      |
| ILMN_2206474 | 1.796 | 1.975 | -0.179 | 1.51 | 1.64E-02 | TMEM90B      |
| ILMN_1717799 | 1.899 | 2.077 | -0.178 | 1.51 | 2.83E-02 | PRKCE        |
| ILMN_1687213 | 1.861 | 2.038 | -0.178 | 1.51 | 2.99E-02 | C8orf13      |
| ILMN_1677723 | 1.925 | 2.102 | -0.177 | 1.50 | 2.53E-02 | ANGPT1       |
| ILMN_1756928 | 1.805 | 1.980 | -0.176 | 1.50 | 6.00E-04 | RTN1         |
| ILMN_1657039 | 1.869 | 2.037 | -0.168 | 1.47 | 6.50E-03 | FILIP1       |
| ILMN_1747347 | 1.922 | 2.088 | -0.166 | 1.47 | 4.09E-02 | C17orf60     |
| ILMN_1663519 | 1.852 | 2.018 | -0.167 | 1.47 | 2.99E-02 | SLC24A3      |
| ILMN_1788955 | 1.819 | 1.980 | -0.161 | 1.45 | 2.69E-02 | PDLIM1       |

Increased in Intact OA vs. Normal

|              |       |       |        |      |          |              |
|--------------|-------|-------|--------|------|----------|--------------|
| ILMN_2313378 | 1.866 | 2.019 | -0.153 | 1.42 | 1.74E-02 | SPAG6        |
| ILMN_2413779 | 1.753 | 1.904 | -0.151 | 1.42 | 1.56E-02 | SEZ6L2       |
| ILMN_1804339 | 1.833 | 1.979 | -0.146 | 1.40 | 1.49E-02 | CAMK1G       |
| ILMN_2322996 | 1.845 | 1.990 | -0.145 | 1.40 | 1.87E-02 | EYA2         |
| ILMN_1813528 | 1.858 | 1.997 | -0.139 | 1.38 | 2.68E-02 | CCBE1        |
| ILMN_3279611 | 1.815 | 1.954 | -0.138 | 1.37 | 4.05E-02 | LOC100131960 |
| ILMN_1692477 | 1.855 | 1.989 | -0.134 | 1.36 | 2.37E-02 | MGAT5B       |
| ILMN_1689086 | 1.868 | 1.998 | -0.129 | 1.35 | 3.76E-02 | CTSC         |
| ILMN_1861059 | 1.829 | 1.955 | -0.126 | 1.34 | 2.81E-02 |              |
| ILMN_1791511 | 1.847 | 1.966 | -0.120 | 1.32 | 3.57E-02 | TMEM176A     |

| <u>Illumina ID</u> | <u>Mean(Normal)</u> | <u>Mean(Intact)</u> | <u>LogRatio</u> | <u>FoldChng</u> | <u>FDR</u> | <u>Symbol</u> |
|--------------------|---------------------|---------------------|-----------------|-----------------|------------|---------------|
| ILMN_3239610       | 3.217               | 1.981               | 1.237           | 17.25           | 1.00E-04   | LOC100133565  |
| ILMN_2412380       | 2.801               | 2.098               | 0.703           | 5.05            | 2.16E-02   | TSC22D1       |
| ILMN_2210519       | 3.064               | 2.474               | 0.590           | 3.89            | 1.04E-02   | HAPLN1        |
| ILMN_1780170       | 3.891               | 3.308               | 0.582           | 3.82            | 0.00E+00   | APOD          |
| ILMN_2167805       | 3.435               | 2.861               | 0.574           | 3.75            | 1.30E-03   | LUM           |
| ILMN_2122103       | 2.993               | 2.434               | 0.559           | 3.62            | 1.10E-02   | ETS1          |
| ILMN_1803647       | 2.672               | 2.129               | 0.542           | 3.48            | 3.57E-02   | FAM162A       |
| ILMN_1651699       | 2.881               | 2.352               | 0.529           | 3.38            | 8.30E-03   | EPS8          |
| ILMN_2056167       | 3.190               | 2.664               | 0.526           | 3.36            | 1.17E-02   | OSTC          |
| ILMN_1803788       | 3.084               | 2.561               | 0.524           | 3.34            | 8.00E-04   | LGALS3        |
| ILMN_1665823       | 3.365               | 2.847               | 0.518           | 3.30            | 4.33E-02   | LOC389787     |
| ILMN_2089329       | 3.174               | 2.663               | 0.511           | 3.24            | 1.16E-02   | SPRY2         |
| ILMN_2353161       | 2.410               | 1.907               | 0.503           | 3.19            | 3.30E-03   | MSLN          |
| ILMN_1731374       | 3.221               | 2.725               | 0.496           | 3.13            | 0.00E+00   | CPE           |
| ILMN_1651228       | 3.607               | 3.118               | 0.489           | 3.08            | 1.98E-02   | RPS28         |
| ILMN_2041101       | 3.449               | 2.972               | 0.477           | 3.00            | 1.35E-02   | ANXA2P1       |
| ILMN_1768582       | 2.531               | 2.056               | 0.475           | 2.99            | 3.28E-02   | PPP2CB        |
| ILMN_2038775       | 3.196               | 2.729               | 0.467           | 2.93            | 5.50E-03   | TUBB2A        |
| ILMN_1664802       | 2.882               | 2.415               | 0.467           | 2.93            | 2.20E-03   | WSB1          |
| ILMN_1655913       | 3.257               | 2.793               | 0.464           | 2.91            | 1.00E-04   | NUCB2         |
| ILMN_2221006       | 2.647               | 2.184               | 0.463           | 2.90            | 1.39E-02   | RAD21         |
| ILMN_1675448       | 2.880               | 2.422               | 0.458           | 2.87            | 2.69E-02   | ZFP36L1       |
| ILMN_1674236       | 3.577               | 3.119               | 0.458           | 2.87            | 1.70E-03   | HSPB1         |
| ILMN_2045419       | 2.512               | 2.058               | 0.454           | 2.85            | 4.30E-03   | BNIP3L        |
| ILMN_2148913       | 3.186               | 2.738               | 0.449           | 2.81            | 2.20E-03   | TMEM45A       |
| ILMN_1704760       | 2.688               | 2.242               | 0.446           | 2.79            | 4.58E-02   | BZW1          |
| ILMN_1694810       | 2.506               | 2.068               | 0.438           | 2.74            | 1.00E-04   | PANX2         |
| ILMN_1656386       | 2.754               | 2.318               | 0.436           | 2.73            | 5.80E-03   | SEC24D        |
| ILMN_3216336       | 3.168               | 2.736               | 0.432           | 2.70            | 2.27E-02   | LOC285741     |
| ILMN_1674620       | 2.914               | 2.488               | 0.426           | 2.67            | 1.16E-02   | SGCE          |
| ILMN_3197767       | 2.851               | 2.426               | 0.425           | 2.66            | 3.54E-02   | LOC645691     |
| ILMN_1742461       | 3.375               | 2.951               | 0.424           | 2.66            | 2.40E-02   | UAP1          |
| ILMN_3195253       | 3.202               | 2.782               | 0.420           | 2.63            | 1.95E-02   | LOC100130892  |
| ILMN_3203444       | 2.898               | 2.482               | 0.416           | 2.61            | 0.00E+00   | LOC100132535  |
| ILMN_2371590       | 3.025               | 2.618               | 0.407           | 2.56            | 3.79E-02   | DDX17         |
| ILMN_1676159       | 3.294               | 2.890               | 0.403           | 2.53            | 1.00E-04   | MST4          |
| ILMN_1775814       | 2.743               | 2.341               | 0.402           | 2.53            | 0.00E+00   | GHR           |
| ILMN_1808824       | 3.022               | 2.624               | 0.398           | 2.50            | 2.65E-02   | NEBL          |
| ILMN_2181540       | 2.663               | 2.264               | 0.399           | 2.50            | 1.98E-02   | YY1           |
| ILMN_2328776       | 3.034               | 2.636               | 0.398           | 2.50            | 2.00E-04   | MST4          |
| ILMN_1658015       | 2.462               | 2.065               | 0.397           | 2.50            | 4.21E-02   | MBNL2         |
| ILMN_1746664       | 2.680               | 2.284               | 0.396           | 2.49            | 4.21E-02   | WSB2          |
| ILMN_2202940       | 2.820               | 2.425               | 0.395           | 2.48            | 1.80E-02   | CHPT1         |
| ILMN_1792997       | 3.282               | 2.888               | 0.394           | 2.48            | 6.00E-04   | NPTN          |
| ILMN_1714709       | 2.921               | 2.528               | 0.394           | 2.48            | 0.00E+00   | OLFM1         |
| ILMN_2219712       | 2.545               | 2.153               | 0.391           | 2.46            | 2.69E-02   | HMGB2         |
| ILMN_2364272       | 2.845               | 2.460               | 0.386           | 2.43            | 6.40E-03   | MBNL2         |
| ILMN_2220283       | 2.886               | 2.504               | 0.382           | 2.41            | 3.76E-02   | HNRPA1L-2     |
| ILMN_1651799       | 3.411               | 3.029               | 0.382           | 2.41            | 5.00E-04   | SLC38A2       |
| ILMN_1757702       | 2.704               | 2.326               | 0.378           | 2.39            | 3.05E-02   | LOC647673     |
| ILMN_1802205       | 2.808               | 2.432               | 0.375           | 2.37            | 1.95E-02   | RHOB          |
| ILMN_2322806       | 2.567               | 2.192               | 0.375           | 2.37            | 7.00E-04   | CAST          |
| ILMN_1698100       | 2.643               | 2.268               | 0.374           | 2.37            | 1.90E-02   | ANXA2P1       |
| ILMN_1689400       | 2.590               | 2.222               | 0.367           | 2.33            | 3.57E-02   | CLK1          |
| ILMN_1764090       | 2.912               | 2.549               | 0.363           | 2.31            | 1.30E-03   | AK3L1         |
| ILMN_2358457       | 3.031               | 2.673               | 0.358           | 2.28            | 3.39E-02   | ATF4          |
| ILMN_2196347       | 2.439               | 2.086               | 0.353           | 2.26            | 2.21E-02   | CDKN1B        |

## Decreased in Intact OA vs. Normal

|              |       |       |       |      |          |              |
|--------------|-------|-------|-------|------|----------|--------------|
| ILMN_3231881 | 2.601 | 2.251 | 0.350 | 2.24 | 3.92E-02 | LOC728026    |
| ILMN_1692177 | 3.241 | 2.892 | 0.350 | 2.24 | 9.00E-03 | TSC22D1      |
| ILMN_1666894 | 3.504 | 3.155 | 0.349 | 2.23 | 2.63E-02 | CSPG4        |
| ILMN_2228732 | 2.349 | 2.000 | 0.349 | 2.23 | 1.50E-03 | CCNG2        |
| ILMN_2327994 | 2.220 | 1.872 | 0.349 | 2.23 | 3.93E-02 | AZIN1        |
| ILMN_1722532 | 2.461 | 2.115 | 0.346 | 2.22 | 7.00E-04 | JMJD1A       |
| ILMN_3241234 | 3.409 | 3.065 | 0.344 | 2.21 | 5.30E-03 | LOC730278    |
| ILMN_1700896 | 2.879 | 2.536 | 0.343 | 2.20 | 3.05E-02 | SAP30        |
| ILMN_1670439 | 2.757 | 2.414 | 0.343 | 2.20 | 2.89E-02 | FYTTD1       |
| ILMN_1687080 | 3.616 | 3.274 | 0.342 | 2.20 | 1.98E-02 | LOC402251    |
| ILMN_1679045 | 2.530 | 2.190 | 0.340 | 2.19 | 2.84E-02 | SBDS         |
| ILMN_2079786 | 2.664 | 2.326 | 0.337 | 2.18 | 6.40E-03 | NUAK1        |
| ILMN_1693136 | 2.702 | 2.365 | 0.337 | 2.17 | 1.74E-02 | VTI1B        |
| ILMN_2398107 | 2.904 | 2.570 | 0.334 | 2.16 | 1.58E-02 | ASNS         |
| ILMN_1788778 | 2.737 | 2.406 | 0.331 | 2.14 | 4.97E-02 | 11-Sep       |
| ILMN_1690894 | 2.389 | 2.060 | 0.328 | 2.13 | 1.69E-02 | TRA1P2       |
| ILMN_1663313 | 3.516 | 3.190 | 0.327 | 2.12 | 1.98E-02 | AMY1C        |
| ILMN_1765019 | 2.622 | 2.297 | 0.325 | 2.11 | 3.87E-02 | SACM1L       |
| ILMN_2117508 | 2.301 | 1.977 | 0.325 | 2.11 | 1.88E-02 | CTHRC1       |
| ILMN_2342841 | 2.449 | 2.125 | 0.324 | 2.11 | 1.13E-02 | AFTPH        |
| ILMN_1673421 | 2.839 | 2.518 | 0.321 | 2.09 | 3.43E-02 | LOC440704    |
| ILMN_1711408 | 2.228 | 1.908 | 0.321 | 2.09 | 3.70E-02 | ANXA4        |
| ILMN_1709479 | 2.983 | 2.662 | 0.321 | 2.09 | 1.90E-02 | YAP1         |
| ILMN_2150465 | 3.135 | 2.814 | 0.321 | 2.09 | 1.39E-02 | C5orf28      |
| ILMN_3235803 | 2.306 | 1.988 | 0.319 | 2.08 | 2.51E-02 | LOC653458    |
| ILMN_1668861 | 2.506 | 2.188 | 0.318 | 2.08 | 2.47E-02 | LOC732165    |
| ILMN_1742025 | 3.220 | 2.904 | 0.317 | 2.07 | 3.70E-03 | OLFM1        |
| ILMN_1713752 | 2.302 | 1.987 | 0.315 | 2.07 | 4.33E-02 | SERINC3      |
| ILMN_1685140 | 2.879 | 2.569 | 0.309 | 2.04 | 6.00E-04 | PRRC1        |
| ILMN_1693334 | 3.322 | 3.013 | 0.309 | 2.04 | 3.70E-03 | P4HA1        |
| ILMN_1723123 | 3.286 | 2.978 | 0.308 | 2.03 | 4.36E-02 | FGFR3        |
| ILMN_1727738 | 2.162 | 1.856 | 0.306 | 2.02 | 2.20E-03 | RAB33B       |
| ILMN_1734696 | 2.909 | 2.604 | 0.306 | 2.02 | 1.58E-02 | FRG1         |
| ILMN_2186482 | 2.983 | 2.678 | 0.305 | 2.02 | 2.03E-02 | TMED7        |
| ILMN_2373266 | 2.589 | 2.284 | 0.305 | 2.02 | 1.53E-02 | SFRS12       |
| ILMN_2153916 | 2.478 | 2.175 | 0.304 | 2.01 | 4.56E-02 | HSPA2        |
| ILMN_3302499 | 2.630 | 2.330 | 0.300 | 2.00 | 4.40E-02 | LOC730990    |
| ILMN_2383913 | 2.457 | 2.159 | 0.298 | 1.99 | 1.55E-02 | WDR33        |
| ILMN_1669788 | 2.629 | 2.331 | 0.298 | 1.98 | 2.89E-02 | NUDT14       |
| ILMN_1692948 | 2.353 | 2.056 | 0.297 | 1.98 | 3.90E-02 | CCDC90B      |
| ILMN_1787567 | 3.721 | 3.426 | 0.295 | 1.97 | 3.15E-02 | TSC22D1      |
| ILMN_1745110 | 3.014 | 2.721 | 0.293 | 1.96 | 2.47E-02 | LAPTM4A      |
| ILMN_2331163 | 2.589 | 2.297 | 0.292 | 1.96 | 1.24E-02 | CUL4A        |
| ILMN_3279712 | 2.873 | 2.581 | 0.291 | 1.96 | 2.20E-03 | LOC642590    |
| ILMN_3239548 | 2.414 | 2.124 | 0.290 | 1.95 | 2.84E-02 | LOC100132740 |
| ILMN_1747744 | 3.149 | 2.860 | 0.289 | 1.95 | 3.04E-02 | LHFPL2       |
| ILMN_1681467 | 2.226 | 1.937 | 0.289 | 1.94 | 4.60E-03 | RAB11FIP4    |
| ILMN_2102960 | 2.280 | 1.992 | 0.288 | 1.94 | 4.79E-02 | KIAA1370     |
| ILMN_1829845 | 2.787 | 2.500 | 0.287 | 1.94 | 4.03E-02 |              |
| ILMN_1694426 | 2.765 | 2.478 | 0.287 | 1.94 | 6.50E-03 | ROR2         |
| ILMN_1770053 | 2.877 | 2.590 | 0.287 | 1.93 | 4.79E-02 | RBBP7        |
| ILMN_1721758 | 2.006 | 1.720 | 0.286 | 1.93 | 4.33E-02 | ID4          |
| ILMN_2154322 | 3.182 | 2.897 | 0.285 | 1.93 | 3.57E-02 | SEMA3E       |
| ILMN_1785765 | 3.269 | 2.985 | 0.284 | 1.92 | 1.55E-02 | TM9SF2       |
| ILMN_2153332 | 2.343 | 2.059 | 0.284 | 1.92 | 4.18E-02 | ATXN1        |
| ILMN_1664449 | 2.968 | 2.685 | 0.282 | 1.92 | 8.20E-03 | ALG5         |
| ILMN_2371055 | 2.983 | 2.704 | 0.279 | 1.90 | 3.75E-02 | EFNA1        |
| ILMN_1803819 | 3.125 | 2.846 | 0.279 | 1.90 | 1.36E-02 | IQGAP1       |

## Decreased in Intact OA vs. Normal

|              |       |       |       |      |          |              |
|--------------|-------|-------|-------|------|----------|--------------|
| ILMN_2147105 | 2.828 | 2.550 | 0.279 | 1.90 | 6.40E-03 | LOC440348    |
| ILMN_3187357 | 2.218 | 1.939 | 0.279 | 1.90 | 4.39E-02 | LOC100130746 |
| ILMN_1725090 | 2.876 | 2.597 | 0.279 | 1.90 | 8.90E-03 | CTHRC1       |
| ILMN_2046611 | 2.517 | 2.240 | 0.277 | 1.89 | 4.76E-02 | MCOLN3       |
| ILMN_2294976 | 2.734 | 2.458 | 0.276 | 1.89 | 2.52E-02 | RNASE4       |
| ILMN_3240117 | 3.104 | 2.831 | 0.273 | 1.87 | 1.60E-02 | AIDA         |
| ILMN_1733176 | 3.099 | 2.826 | 0.273 | 1.87 | 1.60E-02 | LIMS1        |
| ILMN_3250345 | 2.332 | 2.062 | 0.270 | 1.86 | 3.89E-02 | LOC283788    |
| ILMN_1693421 | 3.017 | 2.748 | 0.270 | 1.86 | 1.16E-02 | RPN2         |
| ILMN_1725387 | 2.302 | 2.033 | 0.270 | 1.86 | 2.80E-03 | TMEM200A     |
| ILMN_2063586 | 3.759 | 3.489 | 0.269 | 1.86 | 1.16E-02 | CLIC4        |
| ILMN_2091375 | 2.483 | 2.214 | 0.270 | 1.86 | 1.39E-02 | KRCC1        |
| ILMN_2362581 | 2.553 | 2.286 | 0.267 | 1.85 | 2.69E-02 | FNDC3A       |
| ILMN_1764396 | 2.224 | 1.958 | 0.266 | 1.85 | 4.33E-02 | HDAC4        |
| ILMN_1800078 | 2.170 | 1.904 | 0.265 | 1.84 | 3.57E-02 | LMO2         |
| ILMN_3310416 | 2.325 | 2.061 | 0.264 | 1.84 | 2.70E-03 | SNORD114-3   |
| ILMN_1805800 | 2.622 | 2.358 | 0.263 | 1.83 | 4.16E-02 | RAB5A        |
| ILMN_2136971 | 2.098 | 1.835 | 0.262 | 1.83 | 3.95E-02 | FABP3        |
| ILMN_3291472 | 2.374 | 2.113 | 0.262 | 1.83 | 3.63E-02 | LOC442727    |
| ILMN_2151441 | 2.434 | 2.173 | 0.261 | 1.82 | 8.70E-03 | FAM103A1     |
| ILMN_2356955 | 2.215 | 1.956 | 0.259 | 1.81 | 1.59E-02 | PLAGL1       |
| ILMN_2107613 | 2.309 | 2.051 | 0.257 | 1.81 | 1.39E-02 | RHOJ         |
| ILMN_1778617 | 2.277 | 2.020 | 0.257 | 1.81 | 3.05E-02 | TAF9         |
| ILMN_2145997 | 2.297 | 2.040 | 0.257 | 1.81 | 5.10E-03 | SP4          |
| ILMN_1775962 | 2.434 | 2.178 | 0.255 | 1.80 | 2.21E-02 | MCOLN3       |
| ILMN_1665945 | 3.014 | 2.759 | 0.254 | 1.80 | 2.63E-02 | ACBD3        |
| ILMN_2338921 | 2.568 | 2.314 | 0.254 | 1.79 | 3.93E-02 | C4orf41      |
| ILMN_1703622 | 2.199 | 1.946 | 0.253 | 1.79 | 1.50E-03 | PIIB         |
| ILMN_2182704 | 3.356 | 3.105 | 0.251 | 1.78 | 2.64E-02 | BIRC2        |
| ILMN_1761131 | 3.034 | 2.784 | 0.250 | 1.78 | 2.69E-02 | PECI         |
| ILMN_2062381 | 2.335 | 2.085 | 0.249 | 1.78 | 8.50E-03 | LCOR         |
| ILMN_1738095 | 2.701 | 2.452 | 0.249 | 1.78 | 1.65E-02 | PER2         |
| ILMN_1751227 | 2.468 | 2.219 | 0.249 | 1.77 | 1.65E-02 | LOC401321    |
| ILMN_1707337 | 2.337 | 2.091 | 0.246 | 1.76 | 2.52E-02 | MSTO1        |
| ILMN_2126832 | 2.308 | 2.062 | 0.246 | 1.76 | 3.57E-02 | SEC24A       |
| ILMN_1661888 | 2.520 | 2.274 | 0.246 | 1.76 | 4.09E-02 | MEF2A        |
| ILMN_3307659 | 2.529 | 2.284 | 0.245 | 1.76 | 2.22E-02 | SFT2D2       |
| ILMN_1738407 | 2.237 | 1.995 | 0.242 | 1.74 | 4.72E-02 | ULBP1        |
| ILMN_2353358 | 2.453 | 2.213 | 0.240 | 1.74 | 3.66E-02 | LGALS8       |
| ILMN_2213558 | 3.776 | 3.538 | 0.238 | 1.73 | 3.03E-02 | TMED10P      |
| ILMN_2408645 | 2.882 | 2.645 | 0.237 | 1.73 | 4.21E-02 | LOC653566    |
| ILMN_2190414 | 2.543 | 2.307 | 0.236 | 1.72 | 3.06E-02 | ZNF83        |
| ILMN_1696975 | 2.669 | 2.434 | 0.235 | 1.72 | 3.04E-02 | USP1         |
| ILMN_1726693 | 2.296 | 2.061 | 0.234 | 1.72 | 1.64E-02 | GTF2H1       |
| ILMN_2230566 | 2.631 | 2.398 | 0.234 | 1.71 | 3.46E-02 | RAB40B       |
| ILMN_1806790 | 2.255 | 2.022 | 0.233 | 1.71 | 1.49E-02 | ROBO1        |
| ILMN_1772998 | 2.368 | 2.135 | 0.233 | 1.71 | 2.52E-02 | LOC647436    |
| ILMN_3303965 | 2.887 | 2.654 | 0.232 | 1.71 | 4.99E-02 | ZC3H11B      |
| ILMN_1794187 | 2.357 | 2.125 | 0.232 | 1.71 | 2.87E-02 | FBXL3        |
| ILMN_1796537 | 2.098 | 1.866 | 0.232 | 1.71 | 3.30E-03 | FYB          |
| ILMN_1689976 | 2.786 | 2.555 | 0.231 | 1.70 | 4.20E-02 | EDIL3        |
| ILMN_1661917 | 4.099 | 3.870 | 0.229 | 1.69 | 1.49E-02 | LOC644039    |
| ILMN_1663149 | 2.244 | 2.016 | 0.227 | 1.69 | 3.15E-02 | SRP54        |
| ILMN_3298829 | 2.165 | 1.938 | 0.227 | 1.69 | 3.41E-02 | LOC729505    |
| ILMN_2212690 | 2.106 | 1.879 | 0.227 | 1.69 | 1.79E-02 | ZC3H7A       |
| ILMN_3251436 | 2.118 | 1.893 | 0.225 | 1.68 | 1.27E-02 | DENND4C      |
| ILMN_3282395 | 2.238 | 2.013 | 0.225 | 1.68 | 1.47E-02 | LOC646966    |
| ILMN_1656670 | 2.422 | 2.202 | 0.220 | 1.66 | 4.68E-02 | HLA-G        |



## Decreased in Intact OA vs. Normal

|              |       |       |       |      |          |           |
|--------------|-------|-------|-------|------|----------|-----------|
| ILMN_1683959 | 2.204 | 1.988 | 0.216 | 1.64 | 3.39E-02 | MED13L    |
| ILMN_1675106 | 2.210 | 1.995 | 0.215 | 1.64 | 1.47E-02 | YIPF2     |
| ILMN_2133784 | 2.386 | 2.173 | 0.213 | 1.63 | 4.79E-02 | PATE2     |
| ILMN_3242462 | 2.231 | 2.020 | 0.212 | 1.63 | 1.68E-02 | UHRF1BP1  |
| ILMN_1801068 | 2.200 | 1.989 | 0.212 | 1.63 | 3.93E-02 | DACT1     |
| ILMN_2398388 | 2.273 | 2.061 | 0.212 | 1.63 | 3.43E-02 | APH1A     |
| ILMN_2320906 | 2.186 | 1.975 | 0.211 | 1.63 | 2.16E-02 | RTN3      |
| ILMN_3201480 | 4.143 | 3.933 | 0.210 | 1.62 | 2.14E-02 | LOC643358 |
| ILMN_2204664 | 2.225 | 2.017 | 0.208 | 1.61 | 1.64E-02 | NBPF14    |
| ILMN_1702946 | 2.252 | 2.045 | 0.207 | 1.61 | 3.02E-02 | THUMPD1   |
| ILMN_2135339 | 2.279 | 2.072 | 0.207 | 1.61 | 3.62E-02 | C3orf70   |
| ILMN_1801923 | 2.226 | 2.026 | 0.199 | 1.58 | 4.11E-02 | ATF1      |
| ILMN_2223720 | 2.143 | 1.944 | 0.199 | 1.58 | 8.30E-03 | ATMIN     |
| ILMN_1739622 | 2.251 | 2.052 | 0.199 | 1.58 | 4.45E-02 | PPP1R12A  |
| ILMN_1682233 | 2.187 | 1.990 | 0.196 | 1.57 | 2.90E-02 | ESCO1     |
| ILMN_1781173 | 2.002 | 1.824 | 0.178 | 1.51 | 2.42E-02 | HDAC9     |
| ILMN_1723969 | 2.045 | 1.872 | 0.173 | 1.49 | 2.80E-03 | PLCB1     |
| ILMN_1776640 | 1.992 | 1.820 | 0.172 | 1.49 | 1.64E-02 | MPL       |
| ILMN_2148193 | 1.996 | 1.832 | 0.164 | 1.46 | 4.77E-02 | MPPED2    |
| ILMN_3236373 | 2.078 | 1.922 | 0.157 | 1.43 | 4.34E-02 | MSL2      |
| ILMN_1780496 | 2.068 | 1.920 | 0.148 | 1.41 | 4.34E-02 | MGC12760  |
| ILMN_3277321 | 2.018 | 1.875 | 0.142 | 1.39 | 4.79E-02 | LOC392264 |
| ILMN_1712211 | 1.998 | 1.861 | 0.137 | 1.37 | 3.72E-02 | FLJ10246  |
| ILMN_3294741 | 2.012 | 1.877 | 0.136 | 1.37 | 2.76E-02 | LOC644496 |
| ILMN_1779333 | 2.003 | 1.875 | 0.128 | 1.34 | 4.09E-02 | MSRB3     |

## Increased in Fibrillated OA vs. Normal

| <u>Illumina ID</u> | <u>Mean(Normal)</u> | <u>Mean(Fibrillated)</u> | <u>LogRatio</u> | <u>FoldChng</u> | <u>FDR</u> | <u>Symbol</u> |
|--------------------|---------------------|--------------------------|-----------------|-----------------|------------|---------------|
| ILMN_1699651       | 2.611               | 3.826                    | -1.215          | 16.39           | 8.40E-03   | IL6           |
| ILMN_1763837       | 1.980               | 2.804                    | -0.823          | 6.66            | 0.00E+00   | ANPEP         |
| ILMN_2167758       | 2.440               | 3.224                    | -0.784          | 6.08            | 1.10E-03   | CILP          |
| ILMN_1738116       | 1.898               | 2.635                    | -0.737          | 5.46            | 0.00E+00   | TMEM119       |
| ILMN_1792455       | 2.681               | 3.411                    | -0.730          | 5.37            | 0.00E+00   | TMEM158       |
| ILMN_1748538       | 2.805               | 3.515                    | -0.711          | 5.14            | 0.00E+00   | ALDH1A2       |
| ILMN_1746013       | 2.551               | 3.238                    | -0.687          | 4.86            | 0.00E+00   | SPOCK1        |
| ILMN_1723847       | 3.401               | 4.077                    | -0.676          | 4.75            | 2.00E-04   | CILP          |
| ILMN_1800317       | 1.814               | 2.488                    | -0.675          | 4.73            | 9.20E-03   | WNT5A         |
| ILMN_1701308       | 2.307               | 2.973                    | -0.666          | 4.63            | 2.55E-02   | COL1A1        |
| ILMN_1707124       | 2.196               | 2.838                    | -0.642          | 4.39            | 2.08E-02   | TFPI          |
| ILMN_2383707       | 2.221               | 2.849                    | -0.627          | 4.24            | 0.00E+00   | ALDH1A2       |
| ILMN_1760347       | 2.888               | 3.514                    | -0.625          | 4.22            | 4.70E-03   | SRGN          |
| ILMN_2169152       | 2.832               | 3.452                    | -0.620          | 4.17            | 1.83E-02   | SRGN          |
| ILMN_1662619       | 2.155               | 2.773                    | -0.618          | 4.15            | 1.09E-02   | TFPI          |
| ILMN_2398159       | 2.597               | 3.214                    | -0.617          | 4.14            | 4.70E-03   | DKK3          |
| ILMN_2212878       | 2.056               | 2.660                    | -0.604          | 4.02            | 2.08E-02   | ESM1          |
| ILMN_1815673       | 2.519               | 3.115                    | -0.596          | 3.94            | 2.39E-02   | DKK3          |
| ILMN_2387385       | 2.119               | 2.712                    | -0.593          | 3.91            | 2.60E-03   | IGFBP1        |
| ILMN_1739001       | 2.570               | 3.155                    | -0.585          | 3.84            | 6.00E-04   | TACSTD2       |
| ILMN_1688780       | 3.339               | 3.920                    | -0.581          | 3.81            | 0.00E+00   | S100A4        |
| ILMN_1751161       | 2.409               | 2.986                    | -0.577          | 3.78            | 3.15E-02   | COL7A1        |
| ILMN_1789418       | 2.069               | 2.638                    | -0.570          | 3.71            | 7.00E-04   | GSTT2         |
| ILMN_1684306       | 3.325               | 3.849                    | -0.524          | 3.34            | 0.00E+00   | S100A4        |
| ILMN_3240433       | 2.015               | 2.535                    | -0.520          | 3.31            | 0.00E+00   | GSTT2B        |
| ILMN_1671142       | 2.250               | 2.768                    | -0.518          | 3.29            | 1.10E-03   | GPR68         |
| ILMN_1685433       | 1.953               | 2.463                    | -0.510          | 3.23            | 2.55E-02   | COL8A1        |
| ILMN_1673566       | 2.669               | 3.152                    | -0.483          | 3.04            | 2.43E-02   | ADAMTS1       |
| ILMN_1702973       | 1.896               | 2.372                    | -0.476          | 2.99            | 0.00E+00   | TMEM166       |
| ILMN_1656057       | 2.145               | 2.618                    | -0.472          | 2.97            | 0.00E+00   | PLAU          |
| ILMN_1670926       | 2.469               | 2.924                    | -0.455          | 2.85            | 1.40E-03   | CHST15        |
| ILMN_2355549       | 1.987               | 2.440                    | -0.453          | 2.84            | 3.00E-04   | GSTT2         |
| ILMN_1675797       | 2.328               | 2.777                    | -0.450          | 2.82            | 0.00E+00   | EPDR1         |
| ILMN_1654396       | 2.280               | 2.717                    | -0.438          | 2.74            | 8.80E-03   | ITGB2         |
| ILMN_1717934       | 2.245               | 2.669                    | -0.425          | 2.66            | 0.00E+00   | SYT11         |
| ILMN_1769388       | 1.968               | 2.391                    | -0.423          | 2.65            | 0.00E+00   | GJB2          |
| ILMN_2062468       | 3.217               | 3.639                    | -0.422          | 2.64            | 0.00E+00   | IGFBP7        |
| ILMN_1800540       | 2.537               | 2.958                    | -0.421          | 2.64            | 7.00E-03   | CD55          |
| ILMN_1681515       | 2.425               | 2.839                    | -0.415          | 2.60            | 1.80E-03   | CRLF1         |
| ILMN_3245564       | 1.860               | 2.264                    | -0.405          | 2.54            | 0.00E+00   | RICH2         |
| ILMN_1910180       | 2.729               | 3.128                    | -0.399          | 2.51            | 1.40E-03   |               |
| ILMN_1760778       | 2.998               | 3.392                    | -0.393          | 2.47            | 2.80E-03   | ENG           |
| ILMN_1761858       | 1.974               | 2.367                    | -0.393          | 2.47            | 1.40E-03   | MID1          |
| ILMN_1800787       | 2.139               | 2.526                    | -0.388          | 2.44            | 2.07E-02   | RFTN1         |
| ILMN_1712112       | 2.734               | 3.121                    | -0.387          | 2.44            | 3.90E-03   | RCAN1         |
| ILMN_1696048       | 2.671               | 3.056                    | -0.385          | 2.43            | 2.08E-02   | C13orf33      |
| ILMN_1656938       | 2.341               | 2.722                    | -0.381          | 2.40            | 4.95E-02   | LOC731486     |
| ILMN_3244611       | 2.274               | 2.651                    | -0.377          | 2.38            | 1.00E-04   | LOC100132060  |
| ILMN_1692077       | 2.116               | 2.488                    | -0.373          | 2.36            | 0.00E+00   | MXRA7         |
| ILMN_1701204       | 2.232               | 2.604                    | -0.372          | 2.35            | 1.22E-02   | VEGFC         |
| ILMN_1652413       | 1.849               | 2.218                    | -0.369          | 2.34            | 3.68E-02   | UCN2          |
| ILMN_1655884       | 2.712               | 3.079                    | -0.367          | 2.33            | 2.00E-04   | ATP2A2        |
| ILMN_2175912       | 2.381               | 2.747                    | -0.367          | 2.33            | 2.62E-02   | ITGB2         |
| ILMN_1688703       | 2.010               | 2.372                    | -0.361          | 2.30            | 1.37E-02   | C17orf47      |
| ILMN_2396444       | 3.073               | 3.433                    | -0.360          | 2.29            | 3.14E-02   | CD14          |
| ILMN_1696347       | 2.434               | 2.793                    | -0.359          | 2.29            | 1.75E-02   | CTSC          |
| ILMN_1701643       | 2.223               | 2.580                    | -0.357          | 2.28            | 2.78E-02   | GDPD5         |

## Increased in Fibrillated OA vs. Normal

|              |       |       |        |      |          |           |
|--------------|-------|-------|--------|------|----------|-----------|
| ILMN_1705750 | 3.612 | 3.967 | -0.355 | 2.26 | 2.78E-02 | TGM2      |
| ILMN_2134974 | 2.309 | 2.663 | -0.354 | 2.26 | 9.00E-04 | RAB38     |
| ILMN_1707727 | 3.475 | 3.824 | -0.349 | 2.23 | 3.14E-02 | ANGPTL4   |
| ILMN_1812926 | 2.490 | 2.836 | -0.346 | 2.22 | 0.00E+00 | ANTXR2    |
| ILMN_1674183 | 2.077 | 2.419 | -0.343 | 2.20 | 2.90E-03 | MT1JP     |
| ILMN_1785252 | 2.473 | 2.815 | -0.342 | 2.20 | 1.10E-03 | SLC26A6   |
| ILMN_1813341 | 2.068 | 2.410 | -0.342 | 2.20 | 3.43E-02 | PTGFR     |
| ILMN_1883255 | 2.038 | 2.380 | -0.342 | 2.20 | 1.40E-02 | LOC729254 |
| ILMN_1658384 | 3.749 | 4.087 | -0.337 | 2.17 | 2.13E-02 | CRTAC1    |
| ILMN_1687440 | 2.369 | 2.704 | -0.335 | 2.16 | 8.00E-04 | HIPK2     |
| ILMN_2090105 | 3.229 | 3.564 | -0.335 | 2.16 | 4.10E-03 | TAGLN2    |
| ILMN_2367239 | 3.362 | 3.695 | -0.333 | 2.15 | 9.40E-03 | RCAN1     |
| ILMN_1764850 | 2.841 | 3.173 | -0.332 | 2.15 | 1.95E-02 | HPCAL1    |
| ILMN_1802780 | 1.822 | 2.149 | -0.327 | 2.12 | 1.04E-02 | M160      |
| ILMN_1691892 | 2.419 | 2.745 | -0.326 | 2.12 | 3.00E-04 | TAGLN2    |
| ILMN_1678170 | 1.774 | 2.100 | -0.326 | 2.12 | 4.91E-02 | MME       |
| ILMN_1811468 | 2.019 | 2.343 | -0.324 | 2.11 | 1.50E-03 | IRX3      |
| ILMN_1656300 | 2.170 | 2.491 | -0.322 | 2.10 | 8.80E-03 | GFRA2     |
| ILMN_1873621 | 2.802 | 3.119 | -0.318 | 2.08 | 6.60E-03 | NTN1      |
| ILMN_1819384 | 2.262 | 2.577 | -0.315 | 2.06 | 2.54E-02 |           |
| ILMN_1683271 | 3.771 | 4.084 | -0.313 | 2.06 | 1.00E-04 | TMSB4X    |
| ILMN_1669362 | 3.474 | 3.787 | -0.313 | 2.06 | 7.00E-04 | IGFBP6    |
| ILMN_2309156 | 2.463 | 2.774 | -0.312 | 2.05 | 1.10E-03 | PMEPA1    |
| ILMN_2065022 | 1.901 | 2.211 | -0.311 | 2.04 | 0.00E+00 | KIAA0672  |
| ILMN_1848913 | 2.037 | 2.345 | -0.308 | 2.03 | 1.50E-03 |           |
| ILMN_1789510 | 2.951 | 3.257 | -0.306 | 2.02 | 2.30E-03 | STIP1     |
| ILMN_1804789 | 2.449 | 2.753 | -0.304 | 2.01 | 4.97E-02 | KIAA1967  |
| ILMN_3307906 | 2.534 | 2.836 | -0.302 | 2.00 | 1.77E-02 | PALMD     |
| ILMN_1779228 | 1.784 | 2.086 | -0.302 | 2.00 | 5.20E-03 | CDH2      |
| ILMN_1685397 | 2.586 | 2.887 | -0.301 | 2.00 | 2.88E-02 | ITGA3     |
| ILMN_1781761 | 1.809 | 2.108 | -0.299 | 1.99 | 5.00E-04 | ENPP4     |
| ILMN_1766539 | 2.325 | 2.622 | -0.297 | 1.98 | 2.20E-03 | LOC643319 |
| ILMN_1912737 | 2.183 | 2.481 | -0.297 | 1.98 | 7.40E-03 |           |
| ILMN_1727671 | 2.251 | 2.548 | -0.296 | 1.98 | 3.41E-02 | SSH1      |
| ILMN_1671151 | 2.012 | 2.307 | -0.296 | 1.98 | 1.70E-02 | RARB      |
| ILMN_1665736 | 3.175 | 3.468 | -0.294 | 1.97 | 7.50E-03 | LOC648024 |
| ILMN_2394250 | 2.662 | 2.956 | -0.293 | 1.97 | 5.50E-03 | PLEKHA1   |
| ILMN_2395652 | 2.073 | 2.366 | -0.293 | 1.96 | 1.61E-02 | PTGFR     |
| ILMN_1794501 | 1.974 | 2.266 | -0.293 | 1.96 | 1.83E-02 | HAS3      |
| ILMN_1743836 | 2.714 | 3.005 | -0.291 | 1.95 | 6.40E-03 | MXRA7     |
| ILMN_1680132 | 2.007 | 2.293 | -0.286 | 1.93 | 2.90E-03 | CADM1     |
| ILMN_2129927 | 2.311 | 2.595 | -0.284 | 1.92 | 8.80E-03 | EXT1      |
| ILMN_1678692 | 2.382 | 2.666 | -0.284 | 1.92 | 6.80E-03 | MPRIP     |
| ILMN_3194638 | 1.843 | 2.126 | -0.283 | 1.92 | 3.35E-02 | FAM176A   |
| ILMN_1732921 | 2.018 | 2.300 | -0.282 | 1.92 | 2.44E-02 | ITGB8     |
| ILMN_1717639 | 2.020 | 2.302 | -0.282 | 1.91 | 1.81E-02 | SIK1      |
| ILMN_1758672 | 2.551 | 2.831 | -0.280 | 1.91 | 2.25E-02 | FAM107B   |
| ILMN_1811104 | 2.946 | 3.225 | -0.279 | 1.90 | 1.21E-02 | KTELC1    |
| ILMN_1851610 | 1.883 | 2.161 | -0.278 | 1.90 | 2.00E-04 |           |
| ILMN_3304898 | 2.944 | 3.220 | -0.276 | 1.89 | 1.56E-02 | LOC92755  |
| ILMN_3306742 | 2.735 | 3.011 | -0.276 | 1.89 | 1.19E-02 | SIGMAR1   |
| ILMN_1688480 | 3.476 | 3.751 | -0.275 | 1.88 | 1.63E-02 | CCND1     |
| ILMN_1781999 | 2.337 | 2.612 | -0.275 | 1.88 | 6.10E-03 | ABCF2     |
| ILMN_1696485 | 2.559 | 2.834 | -0.275 | 1.88 | 1.08E-02 | HNRNPAB   |
| ILMN_1787265 | 2.854 | 3.128 | -0.274 | 1.88 | 1.76E-02 | ZNF503    |
| ILMN_1792885 | 2.212 | 2.475 | -0.263 | 1.83 | 2.88E-02 | CTSC      |
| ILMN_1677432 | 2.191 | 2.453 | -0.262 | 1.83 | 4.93E-02 | SRGAP1    |
| ILMN_2399893 | 2.952 | 3.212 | -0.260 | 1.82 | 4.95E-02 | RPS24     |

## Increased in Fibrillated OA vs. Normal

|              |       |       |        |      |          |           |
|--------------|-------|-------|--------|------|----------|-----------|
| ILMN_3237632 | 2.828 | 3.087 | -0.259 | 1.82 | 2.77E-02 | NCLN      |
| ILMN_1815666 | 2.901 | 3.160 | -0.259 | 1.81 | 3.06E-02 | ATP2A2    |
| ILMN_1680618 | 2.958 | 3.211 | -0.253 | 1.79 | 2.58E-02 | MYC       |
| ILMN_1695422 | 2.661 | 2.914 | -0.253 | 1.79 | 3.46E-02 | NCL       |
| ILMN_2129505 | 2.642 | 2.895 | -0.253 | 1.79 | 1.95E-02 | CYBASC3   |
| ILMN_1728024 | 2.323 | 2.574 | -0.250 | 1.78 | 1.35E-02 | TUBG1     |
| ILMN_2374340 | 3.077 | 3.326 | -0.249 | 1.77 | 4.29E-02 | PLAUR     |
| ILMN_1704305 | 2.778 | 3.026 | -0.248 | 1.77 | 3.31E-02 | NIP7      |
| ILMN_1767253 | 2.448 | 2.695 | -0.247 | 1.77 | 2.09E-02 | RRP12     |
| ILMN_2326282 | 2.634 | 2.877 | -0.243 | 1.75 | 2.78E-02 | C19orf6   |
| ILMN_1721541 | 1.973 | 2.216 | -0.243 | 1.75 | 4.29E-02 | WIF1      |
| ILMN_2334989 | 3.022 | 3.263 | -0.241 | 1.74 | 3.61E-02 | CCT3      |
| ILMN_1756784 | 2.205 | 2.444 | -0.239 | 1.73 | 2.29E-02 | FREQ      |
| ILMN_1809364 | 1.916 | 2.155 | -0.239 | 1.73 | 3.00E-03 | NTF3      |
| ILMN_1651262 | 3.441 | 3.678 | -0.237 | 1.73 | 3.34E-02 | HNRNPAB   |
| ILMN_1736441 | 2.635 | 2.870 | -0.235 | 1.72 | 3.76E-02 | PDXP      |
| ILMN_1681886 | 2.204 | 2.438 | -0.234 | 1.72 | 2.83E-02 | ADAMTS5   |
| ILMN_1672608 | 1.989 | 2.224 | -0.234 | 1.72 | 1.48E-02 | PPAP2B    |
| ILMN_1814221 | 1.912 | 2.146 | -0.234 | 1.71 | 4.06E-02 | NPTX1     |
| ILMN_2357809 | 2.281 | 2.514 | -0.233 | 1.71 | 2.48E-02 | G3BP1     |
| ILMN_1747412 | 2.018 | 2.251 | -0.233 | 1.71 | 1.45E-02 | DPP3      |
| ILMN_1690040 | 2.087 | 2.319 | -0.232 | 1.71 | 2.28E-02 | TM7SF2    |
| ILMN_1693410 | 2.528 | 2.758 | -0.230 | 1.70 | 2.59E-02 | BRI3BP    |
| ILMN_3206343 | 3.374 | 3.603 | -0.230 | 1.70 | 3.83E-02 | LOC644914 |
| ILMN_1729115 | 2.532 | 2.762 | -0.229 | 1.70 | 3.10E-02 | LOC651816 |
| ILMN_1735499 | 2.467 | 2.696 | -0.229 | 1.70 | 3.59E-02 | DCBLD2    |
| ILMN_1798172 | 2.552 | 2.778 | -0.226 | 1.68 | 4.43E-02 | IPO4      |
| ILMN_1669631 | 2.083 | 2.308 | -0.226 | 1.68 | 2.61E-02 | GLRB      |
| ILMN_1712587 | 2.190 | 2.415 | -0.225 | 1.68 | 3.06E-02 | ARSB      |
| ILMN_1696585 | 2.013 | 2.237 | -0.224 | 1.67 | 1.37E-02 | FERMT1    |
| ILMN_1724609 | 2.595 | 2.819 | -0.224 | 1.67 | 4.30E-02 | SLC2A8    |
| ILMN_1722397 | 1.860 | 2.083 | -0.224 | 1.67 | 1.89E-02 | LOC729137 |
| ILMN_1695485 | 2.053 | 2.276 | -0.223 | 1.67 | 3.10E-02 | C9orf109  |
| ILMN_1665148 | 3.631 | 3.849 | -0.218 | 1.65 | 4.30E-02 | LOC648249 |
| ILMN_1782275 | 1.936 | 2.152 | -0.216 | 1.65 | 2.02E-02 | P2RY6     |
| ILMN_1709039 | 2.074 | 2.290 | -0.215 | 1.64 | 3.91E-02 | RPL13     |
| ILMN_1738657 | 1.891 | 2.103 | -0.211 | 1.63 | 6.80E-03 | SATB2     |
| ILMN_1797362 | 1.957 | 2.166 | -0.209 | 1.62 | 2.43E-02 | LIMK1     |
| ILMN_2206474 | 1.796 | 2.004 | -0.208 | 1.61 | 2.30E-03 | TMEM90B   |
| ILMN_1760714 | 3.781 | 3.987 | -0.206 | 1.61 | 3.67E-02 | RPS3      |
| ILMN_2389064 | 1.841 | 2.047 | -0.205 | 1.60 | 4.03E-02 | C15orf48  |
| ILMN_1710885 | 3.798 | 3.999 | -0.201 | 1.59 | 4.37E-02 | LOC387867 |
| ILMN_1788955 | 1.819 | 2.020 | -0.201 | 1.59 | 1.70E-03 | PDLIM1    |
| ILMN_1775405 | 1.928 | 2.123 | -0.195 | 1.57 | 4.56E-02 | ARL4A     |
| ILMN_2337058 | 1.995 | 2.189 | -0.194 | 1.56 | 3.91E-02 | PORCN     |
| ILMN_1813379 | 1.904 | 2.095 | -0.191 | 1.55 | 4.03E-02 | TNFRSF9   |
| ILMN_1687213 | 1.861 | 2.051 | -0.190 | 1.55 | 1.45E-02 | C8orf13   |
| ILMN_1728218 | 1.893 | 2.082 | -0.190 | 1.55 | 1.25E-02 | RBPMS     |
| ILMN_1738420 | 1.998 | 2.188 | -0.190 | 1.55 | 4.82E-02 | TMEM201   |
| ILMN_1806576 | 1.943 | 2.131 | -0.188 | 1.54 | 3.34E-02 | LOC651137 |
| ILMN_1762095 | 1.882 | 2.067 | -0.185 | 1.53 | 1.56E-02 | TMTC4     |
| ILMN_1713401 | 1.901 | 2.086 | -0.185 | 1.53 | 3.34E-02 | LOC646607 |
| ILMN_2325168 | 1.953 | 2.137 | -0.184 | 1.53 | 4.51E-02 | ARRB1     |
| ILMN_1688886 | 1.888 | 2.071 | -0.183 | 1.52 | 1.37E-02 | GPC5      |
| ILMN_3244640 | 1.936 | 2.115 | -0.179 | 1.51 | 2.23E-02 | SNORD96A  |
| ILMN_1801307 | 1.878 | 2.054 | -0.176 | 1.50 | 2.48E-02 | TNFSF10   |
| ILMN_1803686 | 1.884 | 2.060 | -0.176 | 1.50 | 2.82E-02 | ADA       |
| ILMN_1658989 | 1.922 | 2.096 | -0.173 | 1.49 | 2.78E-02 | MEX3B     |

## Increased in Fibrillated OA vs. Normal

|              |       |       |        |      |          |              |
|--------------|-------|-------|--------|------|----------|--------------|
| ILMN_1756928 | 1.805 | 1.978 | -0.173 | 1.49 | 7.00E-04 | RTN1         |
| ILMN_1760849 | 1.824 | 1.997 | -0.172 | 1.49 | 6.10E-03 | NETO2        |
| ILMN_1745599 | 1.906 | 2.071 | -0.165 | 1.46 | 4.32E-02 | LOC643977    |
| ILMN_3240900 | 1.851 | 2.015 | -0.164 | 1.46 | 1.87E-02 | LOC100134728 |
| ILMN_1728445 | 1.925 | 2.088 | -0.164 | 1.46 | 4.51E-02 | IGFBP1       |
| ILMN_1745684 | 1.834 | 1.986 | -0.152 | 1.42 | 4.00E-03 | FLJ30375     |
| ILMN_1761322 | 1.811 | 1.963 | -0.151 | 1.42 | 1.24E-02 | FHOD3        |
| ILMN_1832106 | 1.891 | 2.036 | -0.144 | 1.39 | 4.30E-02 | TTC28        |
| ILMN_1804339 | 1.833 | 1.972 | -0.140 | 1.38 | 1.94E-02 | CAMK1G       |
| ILMN_2413779 | 1.753 | 1.891 | -0.138 | 1.37 | 3.09E-02 | SEZ6L2       |
| ILMN_1668092 | 1.809 | 1.944 | -0.135 | 1.36 | 2.09E-02 | ESAM         |
| ILMN_1813528 | 1.858 | 1.988 | -0.130 | 1.35 | 3.83E-02 | CCBE1        |
| ILMN_1672626 | 1.848 | 1.976 | -0.129 | 1.35 | 2.45E-02 | GYPC         |
| ILMN_1660200 | 1.863 | 1.983 | -0.121 | 1.32 | 3.67E-02 | LOC652175    |
| ILMN_1817239 | 1.848 | 1.967 | -0.119 | 1.31 | 4.09E-02 |              |

## Decreased in Fibrillated OA vs. Normal

| <u>Illumina ID</u> | <u>Mean(Normal)</u> | <u>Mean(Fibrillated)</u> | <u>LogRatio</u> | <u>FoldChng</u> | <u>FDR</u> | <u>Symbol</u> |
|--------------------|---------------------|--------------------------|-----------------|-----------------|------------|---------------|
| ILMN_3239610       | 3.217               | 2.199                    | 1.019           | 10.44           | 4.30E-03   | LOC100133565  |
| ILMN_2148527       | 3.695               | 2.974                    | 0.721           | 5.26            | 4.35E-02   | H19           |
| ILMN_2412380       | 2.801               | 2.100                    | 0.701           | 5.03            | 1.94E-02   | TSC22D1       |
| ILMN_3267017       | 3.422               | 2.732                    | 0.690           | 4.90            | 1.74E-02   | LOC100129028  |
| ILMN_2210519       | 3.064               | 2.418                    | 0.647           | 4.43            | 2.60E-03   | HAPLN1        |
| ILMN_2167805       | 3.435               | 2.792                    | 0.643           | 4.39            | 1.00E-04   | LUM           |
| ILMN_1803788       | 3.084               | 2.451                    | 0.634           | 4.30            | 0.00E+00   | LGALS3        |
| ILMN_1651228       | 3.607               | 3.033                    | 0.574           | 3.75            | 2.70E-03   | RPS28         |
| ILMN_1789244       | 3.216               | 2.651                    | 0.564           | 3.67            | 1.11E-02   | SOX8          |
| ILMN_1651699       | 2.881               | 2.319                    | 0.563           | 3.65            | 3.00E-03   | EPS8          |
| ILMN_2122103       | 2.993               | 2.434                    | 0.559           | 3.62            | 9.20E-03   | ETS1          |
| ILMN_3275345       | 3.566               | 3.014                    | 0.552           | 3.56            | 4.10E-03   | LOC100132291  |
| ILMN_3271122       | 3.243               | 2.700                    | 0.543           | 3.49            | 3.83E-02   | LOC100129742  |
| ILMN_1803647       | 2.672               | 2.132                    | 0.540           | 3.47            | 3.20E-02   | FAM162A       |
| ILMN_2353161       | 2.410               | 1.871                    | 0.539           | 3.46            | 1.10E-03   | MSLN          |
| ILMN_2181892       | 2.832               | 2.306                    | 0.526           | 3.36            | 4.12E-02   | BEX2          |
| ILMN_3214532       | 3.287               | 2.767                    | 0.520           | 3.31            | 4.66E-02   | LOC100131205  |
| ILMN_2275502       | 2.484               | 1.965                    | 0.519           | 3.30            | 4.97E-02   | RAPH1         |
| ILMN_1675448       | 2.880               | 2.363                    | 0.517           | 3.29            | 7.30E-03   | ZFP36L1       |
| ILMN_2056167       | 3.190               | 2.675                    | 0.515           | 3.28            | 1.24E-02   | OSTC          |
| ILMN_2038775       | 3.196               | 2.689                    | 0.507           | 3.21            | 1.40E-03   | TUBB2A        |
| ILMN_2371590       | 3.025               | 2.520                    | 0.505           | 3.20            | 3.60E-03   | DDX17         |
| ILMN_2041101       | 3.449               | 2.945                    | 0.504           | 3.19            | 6.20E-03   | ANXA2P1       |
| ILMN_3261439       | 2.977               | 2.474                    | 0.503           | 3.19            | 4.75E-02   | LOC100128098  |
| ILMN_1664802       | 2.882               | 2.381                    | 0.501           | 3.17            | 7.00E-04   | WSB1          |
| ILMN_3301065       | 3.835               | 3.337                    | 0.498           | 3.15            | 4.99E-02   | LOC728590     |
| ILMN_1689725       | 2.839               | 2.356                    | 0.484           | 3.05            | 2.39E-02   | RPLP1         |
| ILMN_2224103       | 2.539               | 2.058                    | 0.482           | 3.03            | 2.09E-02   | PAPSS1        |
| ILMN_1731374       | 3.221               | 2.745                    | 0.476           | 2.99            | 0.00E+00   | CPE           |
| ILMN_1768582       | 2.531               | 2.058                    | 0.473           | 2.97            | 3.06E-02   | PPP2CB        |
| ILMN_1652073       | 3.694               | 3.238                    | 0.457           | 2.86            | 2.38E-02   | LOC653658     |
| ILMN_2044226       | 2.412               | 1.959                    | 0.453           | 2.84            | 3.10E-02   | PPP3CA        |
| ILMN_1674236       | 3.577               | 3.133                    | 0.445           | 2.78            | 2.30E-03   | HSPB1         |
| ILMN_1808824       | 3.022               | 2.580                    | 0.442           | 2.77            | 8.60E-03   | NEBL          |
| ILMN_1655913       | 3.257               | 2.817                    | 0.440           | 2.75            | 3.00E-04   | NUCB2         |
| ILMN_3211906       | 3.334               | 2.896                    | 0.438           | 2.74            | 4.21E-02   | LOC647030     |
| ILMN_3226875       | 3.427               | 2.990                    | 0.437           | 2.74            | 2.48E-02   | LOC728590     |
| ILMN_1658015       | 2.462               | 2.028                    | 0.435           | 2.72            | 1.76E-02   | MBNL2         |
| ILMN_2045419       | 2.512               | 2.078                    | 0.434           | 2.72            | 6.60E-03   | BNIP3L        |
| ILMN_1814719       | 2.919               | 2.486                    | 0.433           | 2.71            | 9.20E-03   | RBP4          |
| ILMN_1723123       | 3.286               | 2.854                    | 0.432           | 2.71            | 7.00E-04   | FGFR3         |
| ILMN_2340935       | 3.228               | 2.800                    | 0.428           | 2.68            | 2.08E-02   | WBP5          |
| ILMN_2148913       | 3.186               | 2.758                    | 0.428           | 2.68            | 3.90E-03   | TMEM45A       |
| ILMN_1651799       | 3.411               | 2.983                    | 0.428           | 2.68            | 0.00E+00   | SLC38A2       |
| ILMN_1775814       | 2.743               | 2.316                    | 0.427           | 2.67            | 0.00E+00   | GHR           |
| ILMN_3238053       | 2.993               | 2.569                    | 0.425           | 2.66            | 3.91E-02   | LOC100129211  |
| ILMN_1656386       | 2.754               | 2.331                    | 0.423           | 2.65            | 7.30E-03   | SEC24D        |
| ILMN_1795243       | 3.090               | 2.672                    | 0.419           | 2.62            | 4.97E-02   | LOC220433     |
| ILMN_3197767       | 2.851               | 2.434                    | 0.418           | 2.62            | 3.56E-02   | LOC645691     |
| ILMN_1780170       | 3.891               | 3.474                    | 0.417           | 2.61            | 4.00E-03   | APOD          |
| ILMN_1674620       | 2.914               | 2.500                    | 0.414           | 2.60            | 1.30E-02   | SGCE          |
| ILMN_3195253       | 3.202               | 2.793                    | 0.410           | 2.57            | 2.09E-02   | LOC100130892  |
| ILMN_3178252       | 3.404               | 2.994                    | 0.409           | 2.57            | 3.86E-02   | LOC100129379  |
| ILMN_2364272       | 2.845               | 2.436                    | 0.409           | 2.57            | 2.30E-03   | MBNL2         |
| ILMN_1692956       | 2.824               | 2.415                    | 0.409           | 2.56            | 4.56E-02   | LOC643949     |
| ILMN_2050654       | 2.571               | 2.163                    | 0.408           | 2.56            | 1.40E-03   | SAV1          |
| ILMN_3211887       | 2.753               | 2.346                    | 0.408           | 2.56            | 3.69E-02   | LOC727821     |

## Decreased in Fibrillated OA vs. Normal

|              |       |       |       |      |          |              |
|--------------|-------|-------|-------|------|----------|--------------|
| ILMN_1714709 | 2.921 | 2.513 | 0.408 | 2.56 | 0.00E+00 | OLFM1        |
| ILMN_1785703 | 2.991 | 2.586 | 0.406 | 2.55 | 3.06E-02 | LMOD3        |
| ILMN_2313158 | 2.937 | 2.532 | 0.406 | 2.54 | 7.00E-03 | MBNL1        |
| ILMN_2221006 | 2.647 | 2.242 | 0.405 | 2.54 | 3.75E-02 | RAD21        |
| ILMN_2192694 | 2.842 | 2.440 | 0.402 | 2.53 | 3.14E-02 | EIF3M        |
| ILMN_2374692 | 3.098 | 2.699 | 0.399 | 2.51 | 3.69E-02 | WAC          |
| ILMN_2181540 | 2.663 | 2.264 | 0.398 | 2.50 | 1.77E-02 | YY1          |
| ILMN_2202940 | 2.820 | 2.425 | 0.394 | 2.48 | 1.62E-02 | CHPT1        |
| ILMN_1680279 | 2.959 | 2.570 | 0.389 | 2.45 | 3.45E-02 | USP49        |
| ILMN_1696839 | 3.640 | 3.250 | 0.389 | 2.45 | 7.40E-03 | RPS27        |
| ILMN_1706117 | 3.624 | 3.237 | 0.387 | 2.44 | 3.65E-02 | LOC391656    |
| ILMN_3300471 | 3.252 | 2.868 | 0.384 | 2.42 | 2.08E-02 | LOC730255    |
| ILMN_1788778 | 2.737 | 2.355 | 0.382 | 2.41 | 1.28E-02 | 11-Sep       |
| ILMN_2183331 | 2.511 | 2.129 | 0.382 | 2.41 | 1.04E-02 | RBM7         |
| ILMN_3178258 | 2.716 | 2.335 | 0.381 | 2.41 | 3.01E-02 | FABP5L2      |
| ILMN_1670439 | 2.757 | 2.376 | 0.381 | 2.40 | 9.80E-03 | FYTTD1       |
| ILMN_1693136 | 2.702 | 2.323 | 0.379 | 2.39 | 4.00E-03 | VTI1B        |
| ILMN_1689552 | 2.817 | 2.439 | 0.379 | 2.39 | 1.62E-02 | FAM63A       |
| ILMN_2262275 | 2.796 | 2.419 | 0.378 | 2.39 | 4.80E-02 | TRIM13       |
| ILMN_2106658 | 3.349 | 2.972 | 0.377 | 2.38 | 2.01E-02 | BLZF1        |
| ILMN_2328776 | 3.034 | 2.659 | 0.375 | 2.37 | 7.00E-04 | MST4         |
| ILMN_1689400 | 2.590 | 2.217 | 0.373 | 2.36 | 2.82E-02 | CLK1         |
| ILMN_1694810 | 2.506 | 2.133 | 0.373 | 2.36 | 2.50E-03 | PANX2        |
| ILMN_2204909 | 3.013 | 2.642 | 0.371 | 2.35 | 3.91E-02 | XRCC2        |
| ILMN_3244319 | 2.985 | 2.617 | 0.368 | 2.33 | 3.68E-02 | CCDC125      |
| ILMN_1792997 | 3.282 | 2.914 | 0.368 | 2.33 | 1.60E-03 | NPTN         |
| ILMN_1669788 | 2.629 | 2.263 | 0.366 | 2.33 | 2.50E-03 | NUDT14       |
| ILMN_1693421 | 3.017 | 2.652 | 0.365 | 2.32 | 0.00E+00 | RPN2         |
| ILMN_3265143 | 2.689 | 2.326 | 0.364 | 2.31 | 4.29E-02 | LOC100129502 |
| ILMN_1764090 | 2.912 | 2.548 | 0.364 | 2.31 | 1.10E-03 | AK3L1        |
| ILMN_1750100 | 2.539 | 2.176 | 0.363 | 2.31 | 3.85E-02 | TUBB4Q       |
| ILMN_1718136 | 3.604 | 3.242 | 0.362 | 2.30 | 3.14E-02 | UQCRHL       |
| ILMN_1698100 | 2.643 | 2.281 | 0.361 | 2.30 | 2.29E-02 | ANXA2P1      |
| ILMN_2079786 | 2.664 | 2.303 | 0.360 | 2.29 | 2.20E-03 | NUAK1        |
| ILMN_1855682 | 2.389 | 2.030 | 0.360 | 2.29 | 1.25E-02 |              |
| ILMN_2322806 | 2.567 | 2.208 | 0.359 | 2.28 | 1.40E-03 | CAST         |
| ILMN_2219712 | 2.545 | 2.186 | 0.358 | 2.28 | 4.72E-02 | HMGB2        |
| ILMN_2196347 | 2.439 | 2.081 | 0.358 | 2.28 | 1.72E-02 | CDKN1B       |
| ILMN_1700896 | 2.879 | 2.523 | 0.356 | 2.27 | 1.96E-02 | SAP30        |
| ILMN_1676159 | 3.294 | 2.938 | 0.355 | 2.27 | 1.10E-03 | MST4         |
| ILMN_1742025 | 3.220 | 2.866 | 0.355 | 2.26 | 5.00E-04 | OLFM1        |
| ILMN_1757702 | 2.704 | 2.349 | 0.355 | 2.26 | 4.46E-02 | LOC647673    |
| ILMN_3302499 | 2.630 | 2.276 | 0.354 | 2.26 | 9.00E-03 | LOC730990    |
| ILMN_3231550 | 2.752 | 2.399 | 0.354 | 2.26 | 2.83E-02 | LOC100131718 |
| ILMN_3231881 | 2.601 | 2.249 | 0.353 | 2.25 | 3.20E-02 | LOC728026    |
| ILMN_1782459 | 2.627 | 2.280 | 0.347 | 2.22 | 1.63E-02 | OSBPL8       |
| ILMN_3235803 | 2.306 | 1.960 | 0.347 | 2.22 | 9.80E-03 | LOC653458    |
| ILMN_1722532 | 2.461 | 2.115 | 0.346 | 2.22 | 7.00E-04 | JMJD1A       |
| ILMN_1802205 | 2.808 | 2.464 | 0.343 | 2.20 | 3.62E-02 | RHOB         |
| ILMN_2150465 | 3.135 | 2.791 | 0.343 | 2.20 | 5.20E-03 | C5orf28      |
| ILMN_3289262 | 2.775 | 2.434 | 0.341 | 2.19 | 2.02E-02 | LOC100131261 |
| ILMN_1679045 | 2.530 | 2.190 | 0.340 | 2.19 | 2.48E-02 | SBDS         |
| ILMN_2371055 | 2.983 | 2.644 | 0.340 | 2.19 | 4.60E-03 | EFNA1        |
| ILMN_1738095 | 2.701 | 2.364 | 0.337 | 2.17 | 1.00E-04 | PER2         |
| ILMN_2228732 | 2.349 | 2.013 | 0.336 | 2.17 | 2.30E-03 | CCNG2        |
| ILMN_1717180 | 2.536 | 2.200 | 0.336 | 2.17 | 3.14E-02 | MTMR6        |
| ILMN_1668861 | 2.506 | 2.171 | 0.335 | 2.16 | 1.33E-02 | LOC732165    |
| ILMN_1711408 | 2.228 | 1.896 | 0.332 | 2.15 | 2.48E-02 | ANXA4        |

## Decreased in Fibrillated OA vs. Normal

|              |       |       |       |      |          |              |
|--------------|-------|-------|-------|------|----------|--------------|
| ILMN_1709479 | 2.983 | 2.652 | 0.330 | 2.14 | 1.26E-02 | YAP1         |
| ILMN_1663313 | 3.516 | 3.187 | 0.329 | 2.14 | 1.63E-02 | AMY1C        |
| ILMN_1765019 | 2.622 | 2.294 | 0.328 | 2.13 | 3.14E-02 | SACM1L       |
| ILMN_3264073 | 2.836 | 2.509 | 0.327 | 2.13 | 4.00E-03 | LOC100130070 |
| ILMN_3287093 | 3.606 | 3.278 | 0.327 | 2.12 | 1.72E-02 | LOC646819    |
| ILMN_3203444 | 2.898 | 2.572 | 0.327 | 2.12 | 3.00E-04 | LOC100132535 |
| ILMN_3243744 | 2.628 | 2.304 | 0.324 | 2.11 | 1.95E-02 | EAPP         |
| ILMN_3279712 | 2.873 | 2.553 | 0.320 | 2.09 | 3.00E-04 | LOC642590    |
| ILMN_1673421 | 2.839 | 2.521 | 0.318 | 2.08 | 3.23E-02 | LOC440704    |
| ILMN_1805668 | 3.541 | 3.225 | 0.315 | 2.07 | 4.26E-02 | ZNF486       |
| ILMN_1747744 | 3.149 | 2.834 | 0.315 | 2.07 | 1.26E-02 | LHFPL2       |
| ILMN_1665982 | 2.453 | 2.139 | 0.314 | 2.06 | 1.11E-02 | AKTIP        |
| ILMN_3237385 | 2.641 | 2.328 | 0.313 | 2.05 | 3.85E-02 | NRBF2        |
| ILMN_3274790 | 2.620 | 2.307 | 0.312 | 2.05 | 1.61E-02 | LOC648921    |
| ILMN_3200539 | 2.446 | 2.134 | 0.312 | 2.05 | 4.66E-02 | LOC100131672 |
| ILMN_1726308 | 2.881 | 2.570 | 0.311 | 2.05 | 3.89E-02 | FAM10A4      |
| ILMN_1803819 | 3.125 | 2.816 | 0.309 | 2.04 | 3.20E-03 | IQGAP1       |
| ILMN_1674706 | 3.040 | 2.731 | 0.309 | 2.04 | 2.23E-02 | MTHFD2       |
| ILMN_3293676 | 3.780 | 3.472 | 0.308 | 2.03 | 7.40E-03 | LOC100131387 |
| ILMN_1805800 | 2.622 | 2.314 | 0.308 | 2.03 | 9.20E-03 | RAB5A        |
| ILMN_3241234 | 3.409 | 3.102 | 0.307 | 2.03 | 1.61E-02 | LOC730278    |
| ILMN_1705111 | 2.541 | 2.234 | 0.307 | 2.03 | 1.24E-02 | FNDC3A       |
| ILMN_1693334 | 3.322 | 3.016 | 0.307 | 2.03 | 3.60E-03 | P4HA1        |
| ILMN_3210538 | 3.790 | 3.484 | 0.306 | 2.02 | 2.10E-03 | LOC646785    |
| ILMN_1694426 | 2.765 | 2.459 | 0.306 | 2.02 | 2.30E-03 | ROR2         |
| ILMN_1690894 | 2.389 | 2.084 | 0.305 | 2.02 | 2.91E-02 | TRA1P2       |
| ILMN_2186482 | 2.983 | 2.680 | 0.303 | 2.01 | 1.91E-02 | TMED7        |
| ILMN_1727738 | 2.162 | 1.859 | 0.303 | 2.01 | 2.20E-03 | RAB33B       |
| ILMN_2342841 | 2.449 | 2.147 | 0.301 | 2.00 | 1.89E-02 | AFTPH        |
| ILMN_2398107 | 2.904 | 2.605 | 0.299 | 1.99 | 3.56E-02 | ASNS         |
| ILMN_2154322 | 3.182 | 2.884 | 0.299 | 1.99 | 2.08E-02 | SEMA3E       |
| ILMN_3266944 | 2.568 | 2.270 | 0.298 | 1.99 | 1.63E-02 | LOC100129599 |
| ILMN_3297898 | 3.121 | 2.824 | 0.297 | 1.98 | 3.83E-02 | LOC729769    |
| ILMN_2117508 | 2.301 | 2.005 | 0.296 | 1.98 | 3.59E-02 | CTHRC1       |
| ILMN_2194009 | 2.468 | 2.172 | 0.296 | 1.98 | 1.04E-02 | ABCC4        |
| ILMN_1675646 | 2.253 | 1.957 | 0.295 | 1.97 | 3.34E-02 | FN1          |
| ILMN_2383913 | 2.457 | 2.163 | 0.294 | 1.97 | 1.56E-02 | WDR33        |
| ILMN_1787567 | 3.721 | 3.428 | 0.294 | 1.97 | 2.97E-02 | TSC22D1      |
| ILMN_3239895 | 2.375 | 2.082 | 0.294 | 1.97 | 3.09E-02 | LOC100134053 |
| ILMN_2373266 | 2.589 | 2.296 | 0.293 | 1.96 | 1.89E-02 | SFRS12       |
| ILMN_2124187 | 2.576 | 2.283 | 0.293 | 1.96 | 1.07E-02 | TSC22D2      |
| ILMN_1739259 | 2.629 | 2.337 | 0.292 | 1.96 | 4.21E-02 | UBE4A        |
| ILMN_3245517 | 2.607 | 2.316 | 0.291 | 1.96 | 1.12E-02 | LOC100134273 |
| ILMN_3300797 | 4.033 | 3.743 | 0.290 | 1.95 | 4.51E-02 | LOC729090    |
| ILMN_2338921 | 2.568 | 2.278 | 0.289 | 1.95 | 1.11E-02 | C4orf41      |
| ILMN_1666376 | 2.460 | 2.173 | 0.288 | 1.94 | 8.10E-03 | TRIM56       |
| ILMN_1667626 | 2.216 | 1.931 | 0.285 | 1.93 | 1.67E-02 | EGLN3        |
| ILMN_2102960 | 2.280 | 1.996 | 0.284 | 1.92 | 4.58E-02 | KIAA1370     |
| ILMN_1783852 | 2.222 | 1.938 | 0.283 | 1.92 | 3.35E-02 | CD164        |
| ILMN_1810838 | 3.077 | 2.793 | 0.283 | 1.92 | 1.96E-02 | MTDH         |
| ILMN_1681467 | 2.226 | 1.942 | 0.283 | 1.92 | 5.10E-03 | RAB11FIP4    |
| ILMN_2129234 | 2.818 | 2.535 | 0.283 | 1.92 | 3.06E-02 | TMEM47       |
| ILMN_1725387 | 2.302 | 2.020 | 0.282 | 1.91 | 1.30E-03 | TMEM200A     |
| ILMN_1734696 | 2.909 | 2.628 | 0.282 | 1.91 | 2.86E-02 | FRG1         |
| ILMN_1786972 | 3.115 | 2.834 | 0.282 | 1.91 | 1.67E-02 | SARS         |
| ILMN_2147105 | 2.828 | 2.547 | 0.281 | 1.91 | 4.70E-03 | LOC440348    |
| ILMN_2153332 | 2.343 | 2.063 | 0.280 | 1.91 | 4.03E-02 | ATXN1        |
| ILMN_1745110 | 3.014 | 2.734 | 0.280 | 1.91 | 3.13E-02 | LAPTM4A      |



## Decreased in Fibrillated OA vs. Normal

|              |       |       |       |      |          |              |
|--------------|-------|-------|-------|------|----------|--------------|
| ILMN_2088825 | 2.402 | 2.122 | 0.280 | 1.91 | 1.93E-02 | CENTB2       |
| ILMN_1685140 | 2.879 | 2.599 | 0.280 | 1.90 | 2.90E-03 | PRRC1        |
| ILMN_1788701 | 2.482 | 2.203 | 0.280 | 1.90 | 3.96E-02 | PSIP1        |
| ILMN_2362581 | 2.553 | 2.275 | 0.278 | 1.89 | 1.66E-02 | FNDC3A       |
| ILMN_3243175 | 3.173 | 2.895 | 0.277 | 1.89 | 1.67E-02 | LOC100132727 |
| ILMN_1707312 | 3.096 | 2.821 | 0.276 | 1.89 | 2.09E-02 | NFIL3        |
| ILMN_2356955 | 2.215 | 1.941 | 0.273 | 1.88 | 7.90E-03 | PLAGL1       |
| ILMN_2059173 | 3.005 | 2.731 | 0.273 | 1.88 | 4.97E-02 | SLC35E1      |
| ILMN_3251620 | 2.274 | 2.001 | 0.273 | 1.87 | 4.46E-02 | JMY          |
| ILMN_2052208 | 2.840 | 2.567 | 0.273 | 1.87 | 1.88E-02 | GADD45A      |
| ILMN_3239548 | 2.414 | 2.141 | 0.272 | 1.87 | 4.09E-02 | LOC100132740 |
| ILMN_2054442 | 2.863 | 2.591 | 0.272 | 1.87 | 2.48E-02 | ZNF146       |
| ILMN_2097410 | 3.493 | 3.222 | 0.271 | 1.87 | 4.59E-02 | DAPP1        |
| ILMN_1691789 | 2.593 | 2.323 | 0.270 | 1.86 | 4.87E-02 | SMNDC1       |
| ILMN_2064132 | 2.141 | 1.872 | 0.269 | 1.86 | 1.83E-02 | NANP         |
| ILMN_1760490 | 3.621 | 3.352 | 0.269 | 1.86 | 1.37E-02 | ACVR1        |
| ILMN_2107613 | 2.309 | 2.039 | 0.269 | 1.86 | 7.40E-03 | RHOJ         |
| ILMN_1761131 | 3.034 | 2.765 | 0.269 | 1.86 | 1.25E-02 | PECI         |
| ILMN_2091375 | 2.483 | 2.214 | 0.269 | 1.86 | 1.24E-02 | KRCC1        |
| ILMN_1672947 | 2.258 | 1.990 | 0.268 | 1.85 | 3.58E-02 | CAST         |
| ILMN_3178792 | 3.037 | 2.769 | 0.268 | 1.85 | 3.06E-02 | HNRNPA2B1    |
| ILMN_1732216 | 3.318 | 3.052 | 0.266 | 1.85 | 2.02E-02 | NARS         |
| ILMN_1764396 | 2.224 | 1.958 | 0.266 | 1.84 | 3.83E-02 | HDAC4        |
| ILMN_1689976 | 2.786 | 2.520 | 0.266 | 1.84 | 1.11E-02 | EDIL3        |
| ILMN_2062381 | 2.335 | 2.070 | 0.265 | 1.84 | 3.20E-03 | LCOR         |
| ILMN_2331163 | 2.589 | 2.325 | 0.264 | 1.84 | 2.62E-02 | CUL4A        |
| ILMN_1664449 | 2.968 | 2.703 | 0.264 | 1.84 | 1.39E-02 | ALG5         |
| ILMN_1690114 | 2.573 | 2.310 | 0.263 | 1.83 | 4.51E-02 | PTPLAD2      |
| ILMN_2124155 | 2.255 | 1.993 | 0.262 | 1.83 | 3.41E-02 | ATP11B       |
| ILMN_1714759 | 3.357 | 3.096 | 0.261 | 1.83 | 1.70E-02 | CNIH4        |
| ILMN_2190414 | 2.543 | 2.282 | 0.261 | 1.82 | 1.11E-02 | ZNF83        |
| ILMN_2246548 | 2.390 | 2.130 | 0.260 | 1.82 | 3.43E-02 | GSTTP2       |
| ILMN_1703622 | 2.199 | 1.939 | 0.260 | 1.82 | 8.00E-04 | PPIB         |
| ILMN_1778202 | 2.634 | 2.375 | 0.260 | 1.82 | 3.93E-02 | FLJ40722     |
| ILMN_1761474 | 2.198 | 1.938 | 0.260 | 1.82 | 2.57E-02 | LOC654189    |
| ILMN_3241970 | 2.389 | 2.131 | 0.258 | 1.81 | 3.83E-02 | POLR2J2      |
| ILMN_3310416 | 2.325 | 2.068 | 0.257 | 1.81 | 3.20E-03 | SNORD114-3   |
| ILMN_1726693 | 2.296 | 2.039 | 0.257 | 1.81 | 5.10E-03 | GTF2H1       |
| ILMN_1785765 | 3.269 | 3.012 | 0.257 | 1.81 | 3.18E-02 | TM9SF2       |
| ILMN_1766000 | 2.277 | 2.020 | 0.257 | 1.81 | 2.80E-03 | PM20D2       |
| ILMN_1660549 | 2.420 | 2.165 | 0.255 | 1.80 | 1.77E-02 | GPR177       |
| ILMN_1806790 | 2.255 | 2.001 | 0.254 | 1.79 | 4.70E-03 | ROBO1        |
| ILMN_1720088 | 2.205 | 1.952 | 0.253 | 1.79 | 4.32E-02 | SFRS12       |
| ILMN_1805646 | 2.796 | 2.543 | 0.253 | 1.79 | 3.94E-02 | SS18         |
| ILMN_2223130 | 2.409 | 2.156 | 0.253 | 1.79 | 2.94E-02 | SMARCA5      |
| ILMN_1674128 | 2.159 | 1.906 | 0.253 | 1.79 | 3.14E-02 | CWC22        |
| ILMN_2230566 | 2.631 | 2.379 | 0.252 | 1.79 | 1.58E-02 | RAB40B       |
| ILMN_1732080 | 2.703 | 2.450 | 0.252 | 1.79 | 4.61E-02 | SUMO1P3      |
| ILMN_3201480 | 4.143 | 3.891 | 0.252 | 1.79 | 2.20E-03 | LOC643358    |
| ILMN_1808777 | 2.840 | 2.589 | 0.251 | 1.78 | 1.83E-02 | EHD2         |
| ILMN_1696975 | 2.669 | 2.418 | 0.251 | 1.78 | 1.53E-02 | USP1         |
| ILMN_3207738 | 2.489 | 2.238 | 0.251 | 1.78 | 4.54E-02 | LOC646527    |
| ILMN_1794187 | 2.357 | 2.106 | 0.251 | 1.78 | 1.26E-02 | FBXL3        |
| ILMN_3242462 | 2.231 | 1.983 | 0.249 | 1.77 | 2.10E-03 | UHRF1BP1     |
| ILMN_2392080 | 2.178 | 1.929 | 0.249 | 1.77 | 4.75E-02 | DCAF6        |
| ILMN_3291472 | 2.374 | 2.126 | 0.248 | 1.77 | 4.75E-02 | LOC442727    |
| ILMN_1733176 | 3.099 | 2.852 | 0.247 | 1.77 | 3.32E-02 | LIMS1        |
| ILMN_1696066 | 2.281 | 2.034 | 0.247 | 1.77 | 2.45E-02 | CARS         |

## Decreased in Fibrillated OA vs. Normal

|              |       |       |       |      |          |              |
|--------------|-------|-------|-------|------|----------|--------------|
| ILMN_2096985 | 2.142 | 1.897 | 0.245 | 1.76 | 3.14E-02 | ALDH6A1      |
| ILMN_2386891 | 2.176 | 1.931 | 0.244 | 1.76 | 3.14E-02 | GLT8D1       |
| ILMN_1694075 | 2.699 | 2.455 | 0.244 | 1.75 | 4.48E-02 | GADD45A      |
| ILMN_1688702 | 3.702 | 3.458 | 0.244 | 1.75 | 2.39E-02 | PJA2         |
| ILMN_3240117 | 3.104 | 2.860 | 0.244 | 1.75 | 3.67E-02 | AIDA         |
| ILMN_2126832 | 2.308 | 2.064 | 0.244 | 1.75 | 3.34E-02 | SEC24A       |
| ILMN_2151441 | 2.434 | 2.192 | 0.242 | 1.75 | 1.61E-02 | FAM103A1     |
| ILMN_3289171 | 2.209 | 1.969 | 0.240 | 1.74 | 1.57E-02 | LOC100131572 |
| ILMN_2398388 | 2.273 | 2.034 | 0.238 | 1.73 | 1.04E-02 | APH1A        |
| ILMN_1661917 | 4.099 | 3.863 | 0.237 | 1.72 | 9.20E-03 | LOC644039    |
| ILMN_1707337 | 2.337 | 2.101 | 0.236 | 1.72 | 3.10E-02 | MSTO1        |
| ILMN_1652955 | 3.490 | 3.254 | 0.236 | 1.72 | 4.66E-02 | LOC648622    |
| ILMN_2142979 | 2.337 | 2.101 | 0.236 | 1.72 | 2.02E-02 | PTBP2        |
| ILMN_1658531 | 2.338 | 2.103 | 0.235 | 1.72 | 2.64E-02 | LOC653702    |
| ILMN_1775962 | 2.434 | 2.199 | 0.234 | 1.72 | 3.86E-02 | MCOLN3       |
| ILMN_2395728 | 2.901 | 2.666 | 0.235 | 1.72 | 3.42E-02 | HNRPUL1      |
| ILMN_2063586 | 3.759 | 3.525 | 0.234 | 1.71 | 3.54E-02 | CLIC4        |
| ILMN_2320906 | 2.186 | 1.953 | 0.233 | 1.71 | 7.00E-03 | RTN3         |
| ILMN_2353358 | 2.453 | 2.221 | 0.232 | 1.71 | 4.12E-02 | LGALS8       |
| ILMN_2137536 | 2.738 | 2.509 | 0.230 | 1.70 | 4.75E-02 | ZZZ3         |
| ILMN_2182704 | 3.356 | 3.127 | 0.229 | 1.70 | 4.67E-02 | BIRC2        |
| ILMN_2083243 | 2.434 | 2.205 | 0.229 | 1.69 | 3.10E-02 | MNAT1        |
| ILMN_3307659 | 2.529 | 2.301 | 0.228 | 1.69 | 3.56E-02 | SFT2D2       |
| ILMN_2346137 | 2.409 | 2.181 | 0.227 | 1.69 | 2.51E-02 | ZNF557       |
| ILMN_1796537 | 2.098 | 1.872 | 0.226 | 1.68 | 4.00E-03 | FYB          |
| ILMN_1811029 | 2.401 | 2.176 | 0.225 | 1.68 | 2.62E-02 | TLK1         |
| ILMN_1775829 | 2.189 | 1.963 | 0.225 | 1.68 | 1.24E-02 | PERP         |
| ILMN_2182348 | 2.056 | 1.831 | 0.225 | 1.68 | 1.02E-02 | SMC3         |
| ILMN_2406132 | 3.995 | 3.772 | 0.223 | 1.67 | 2.60E-02 | LILRB3       |
| ILMN_1678437 | 2.082 | 1.860 | 0.222 | 1.67 | 4.61E-02 | FRY          |
| ILMN_2204664 | 2.225 | 2.005 | 0.220 | 1.66 | 8.40E-03 | NBPF14       |
| ILMN_1881960 | 2.194 | 1.974 | 0.220 | 1.66 | 2.95E-02 |              |
| ILMN_2358980 | 2.394 | 2.175 | 0.219 | 1.66 | 3.15E-02 | ILK          |
| ILMN_2076250 | 2.113 | 1.898 | 0.215 | 1.64 | 1.61E-02 | GPBP1L1      |
| ILMN_2382354 | 2.389 | 2.178 | 0.211 | 1.63 | 4.44E-02 | SENP7        |
| ILMN_1683959 | 2.204 | 1.994 | 0.210 | 1.62 | 3.67E-02 | MED13L       |
| ILMN_1685978 | 2.367 | 2.158 | 0.209 | 1.62 | 4.51E-02 | ATPIF1       |
| ILMN_2145997 | 2.297 | 2.091 | 0.206 | 1.61 | 3.83E-02 | SP4          |
| ILMN_1776487 | 2.257 | 2.052 | 0.205 | 1.60 | 3.09E-02 | TADA1L       |
| ILMN_3282395 | 2.238 | 2.034 | 0.204 | 1.60 | 2.97E-02 | LOC646966    |
| ILMN_1672661 | 2.240 | 2.037 | 0.203 | 1.59 | 3.36E-02 | SP110        |
| ILMN_3251436 | 2.118 | 1.916 | 0.202 | 1.59 | 2.97E-02 | DENND4C      |
| ILMN_1771286 | 2.186 | 1.985 | 0.201 | 1.59 | 2.44E-02 | LOC653513    |
| ILMN_3305899 | 2.129 | 1.930 | 0.199 | 1.58 | 1.24E-02 | LOC728572    |
| ILMN_1702946 | 2.252 | 2.054 | 0.198 | 1.58 | 3.69E-02 | THUMPDI      |
| ILMN_1786359 | 2.211 | 2.016 | 0.195 | 1.57 | 4.29E-02 | LOC346950    |
| ILMN_1801923 | 2.226 | 2.033 | 0.193 | 1.56 | 4.56E-02 | ATF1         |
| ILMN_1736068 | 2.150 | 1.958 | 0.192 | 1.56 | 3.69E-02 | CNOT8        |
| ILMN_2196335 | 2.162 | 1.972 | 0.190 | 1.55 | 2.43E-02 | C12orf11     |
| ILMN_1776640 | 1.992 | 1.805 | 0.188 | 1.54 | 5.60E-03 | MPL          |
| ILMN_1781173 | 2.002 | 1.817 | 0.186 | 1.53 | 1.48E-02 | HDAC9        |
| ILMN_2100258 | 2.140 | 1.956 | 0.183 | 1.52 | 3.83E-02 | PCDHB16      |
| ILMN_1761833 | 2.096 | 1.918 | 0.177 | 1.50 | 1.94E-02 | SLC40A1      |
| ILMN_2414366 | 2.041 | 1.868 | 0.173 | 1.49 | 1.11E-02 | KAT5         |
| ILMN_2223720 | 2.143 | 1.977 | 0.166 | 1.47 | 3.83E-02 | ATMIN        |
| ILMN_3288529 | 2.127 | 1.964 | 0.163 | 1.46 | 4.88E-02 | LOC645630    |
| ILMN_2232494 | 1.995 | 1.833 | 0.162 | 1.45 | 2.29E-02 | C5orf42      |
| ILMN_1683129 | 2.095 | 1.937 | 0.158 | 1.44 | 4.56E-02 | CCNL1        |

## Decreased in Fibrillated OA vs. Normal

|              |       |       |       |      |          |           |
|--------------|-------|-------|-------|------|----------|-----------|
| ILMN_1743067 | 2.072 | 1.920 | 0.152 | 1.42 | 3.83E-02 | ZNF701    |
| ILMN_1730303 | 2.066 | 1.913 | 0.152 | 1.42 | 3.54E-02 | KBTBD7    |
| ILMN_3276005 | 2.077 | 1.929 | 0.148 | 1.41 | 4.83E-02 | LOC648283 |
| ILMN_1723969 | 2.045 | 1.905 | 0.141 | 1.38 | 2.48E-02 | PLCB1     |
| ILMN_1805765 | 1.968 | 1.832 | 0.136 | 1.37 | 1.39E-02 | CMYA5     |
| ILMN_1716736 | 1.981 | 1.846 | 0.135 | 1.36 | 1.42E-02 | CD80      |
| ILMN_1792419 | 1.957 | 1.824 | 0.133 | 1.36 | 3.13E-02 | FRMD7     |
| ILMN_3294741 | 2.012 | 1.886 | 0.126 | 1.34 | 4.24E-02 | LOC644496 |
| ILMN_1784130 | 1.963 | 1.840 | 0.123 | 1.33 | 3.83E-02 | LOC647054 |
| ILMN_3243248 | 1.984 | 1.865 | 0.119 | 1.31 | 4.98E-02 | SNORD87   |
