# Supplementary material for: Transcriptome-Wide Analysis of Messenger RNA Decay in Normal and Osteoarthritic Human Articular Chondrocytes
Source: PubMed Central journal article supplement (PMC4233952; doi:10.1002/art.38849), 2014-10-26
Supplement: art0066-3052-sd2.pdf [file art0066-3052-sd2.pdf]

**Supplemental Data 2**

**Short Lived mRNAs** - 284 mRNAs identified as commonly having a half life of < 6 hours in intact normal, intact OA and fibrillated OA cells. This constitutes  
**Column names are self explanatory for this data**

**GeneSet2miRNA Output** - results of analysis of short lived mRNAs with the Gene set 2miRNA tool at <http://www.bioprofiling.de/index.html>

**Column Names:**

# - Rank in analysis (sorted by p value)

microRNA name - - note the number after the dot refers to whether the miRNA was identified under "soft" (4) or "strict" (5) threshold.

I\_A - The number of genes from the input list predicted to be the target of the MicroRNA (in brackets the size of the input list is reported)

I\_B - The total number of genes predicted to be the target of the MicroRNA (in brackets the number of annotated genes in the whole genome is given)

Odds Ratio -  $(I_A / \text{size\_input\_list}) / (I_B / \text{size\_reference\_list})$  The ratio of occurrence for "MicroRNA model" in the input list to the occurrence for "MicroRNA model"

p - value - The P-value of the enrichment (adjusted for multiple testing by Bonferroni correction or Monte-Carlo simulations)

Gene - Genes identified from input list as being targets of the microRNA

mRNAs with half life <6 hours in all samples examined

| Description                                                                                                     | Illumina ID  | Gene Name     |
|-----------------------------------------------------------------------------------------------------------------|--------------|---------------|
| nuclear receptor interacting protein 1 [Source:HGNC Symbol;Acc:8001]                                            | ILMN_1718629 | NRP1          |
| INO80 complex subunit [Source:HGNC Symbol;Acc:26956]                                                            | ILMN_1678362 | INO80         |
| KN motif and ankyrin repeat domains 1 [Source:HGNC Symbol;Acc:19309]                                            | ILMN_1773427 | KANK1         |
| RNA terminal phosphate cyclase-like 1 [Source:HGNC Symbol;Acc:17687]                                            | ILMN_1813766 | RCL1          |
|                                                                                                                 | ILMN_3255792 | RP11-264C15.2 |
| T-cell lymphoma invasion and metastasis 2 [Source:HGNC Symbol;Acc:11806]                                        | ILMN_2358560 | TIAM2         |
| pleckstrin homology domain containing, family O member 2 [Source:HGNC Symbol;Acc:30026]                         | ILMN_1689968 | PLEKH02       |
| protein tyrosine phosphatase, receptor type, E [Source:HGNC Symbol;Acc:9669]                                    | ILMN_2383611 | PTPRE         |
| dual specificity phosphatase 14 [Source:HGNC Symbol;Acc:17007]                                                  | ILMN_1666546 | DUSP14        |
| ras homolog family member B [Source:HGNC Symbol;Acc:668]                                                        | ILMN_1802205 | RHOB          |
| mitogen-activated protein kinase 6 [Source:HGNC Symbol;Acc:6879]                                                | ILMN_1757287 | MAPK6         |
| BTG family, member 2 [Source:HGNC Symbol;Acc:1131]                                                              | ILMN_1770085 | BTG2          |
| vestigial like 4 (Drosophila) [Source:HGNC Symbol;Acc:28966]                                                    | ILMN_1768480 | VGLL4         |
| nuclear receptor coactivator 5 [Source:HGNC Symbol;Acc:15909]                                                   | ILMN_1770035 | NCOA5         |
| leucine rich repeat containing 37B pseudogene 1 [Source:HGNC Symbol;Acc:25390]                                  | ILMN_3245600 | LRRC37BP1     |
| ankyrin repeat domain 17 [Source:HGNC Symbol;Acc:23575]                                                         | ILMN_1712019 | ANKRD17       |
| BCL2-associated athanogene 3 [Source:HGNC Symbol;Acc:939]                                                       | ILMN_1659766 | BAG3          |
| Myb/SANT-like DNA-binding domain containing 4 with coiled-coils [Source:HGNC Symbol;Acc:29383]                  | ILMN_1801124 | MSANTD4       |
| Rap guanine nucleotide exchange factor (GEF) 2 [Source:HGNC Symbol;Acc:16854]                                   | ILMN_3247261 | RAPGEF2       |
| ring finger protein 144B [Source:HGNC Symbol;Acc:21578]                                                         | ILMN_1752526 | RNF144B       |
| SAM and SH3 domain containing 1 [Source:HGNC Symbol;Acc:19182]                                                  | ILMN_2185984 | SASH1         |
| interferon regulatory factor 2 binding protein-like [Source:HGNC Symbol;Acc:14282]                              | ILMN_1804396 | IRF2BPL       |
| KIAA1737 [Source:HGNC Symbol;Acc:20365]                                                                         | ILMN_2097858 | KIAA1737      |
|                                                                                                                 | ILMN_1704418 | AC099522.1    |
| tuftelin interacting protein 11 [Source:HGNC Symbol;Acc:17165]                                                  | ILMN_2408102 | TFIP11        |
| FOS-like antigen 1 [Source:HGNC Symbol;Acc:13718]                                                               | ILMN_1771841 | FOSL1         |
| insulin receptor substrate 1 [Source:HGNC Symbol;Acc:6125]                                                      | ILMN_1759232 | IRS1          |
| zinc finger, MIZ-type containing 1 [Source:HGNC Symbol;Acc:16493]                                               | ILMN_1771627 | ZMI21         |
| SMAD family member 4 [Source:HGNC Symbol;Acc:6770]                                                              | ILMN_1741477 | SMAD4         |
| THAP domain containing 11 [Source:HGNC Symbol;Acc:23194]                                                        | ILMN_1780699 | THAP11        |
|                                                                                                                 | ILMN_3284366 | RP11-153M3.1  |
| adrenomedullin [Source:HGNC Symbol;Acc:259]                                                                     | ILMN_1708934 | ADM           |
| Cbp/p300-interacting transactivator, with Glu/Asp-rich carboxy-terminal domain, 2 [Source:HGNC Symbol;Acc:1987] | ILMN_1663092 | CITED2        |
| CCR4-NOT transcription complex, subunit 4 [Source:HGNC Symbol;Acc:7880]                                         | ILMN_1772677 | CNO14         |
| X-box binding protein 1 [Source:HGNC Symbol;Acc:12801]                                                          | ILMN_1809433 | XBP1          |
| X-box binding protein 1 [Source:HGNC Symbol;Acc:12801]                                                          | ILMN_2365465 | XBP1          |
| Rho GTPase activating protein 21 [Source:HGNC Symbol;Acc:23725]                                                 | ILMN_1811592 | ARHGAP21      |
| SERTA domain containing 1 [Source:HGNC Symbol;Acc:17932]                                                        | ILMN_1794017 | SERTAD1       |
| zinc finger CCCH-type containing 4 [Source:HGNC Symbol;Acc:17808]                                               | ILMN_2087575 | ZC3H4         |
| RAB11 family interacting protein 5 (class I) [Source:HGNC Symbol;Acc:24845]                                     | ILMN_1740604 | RAB11FIP5     |
| regulator of calcineurin 1 [Source:HGNC Symbol;Acc:3040]                                                        | ILMN_2367239 | RCAN1         |
| forkhead box D2 [Source:HGNC Symbol;Acc:3803]                                                                   | ILMN_1789400 | FOXO2         |
| limb bud and heart development [Source:HGNC Symbol;Acc:29532]                                                   | ILMN_2315979 | LBH           |
| runt-related transcription factor 1 [Source:HGNC Symbol;Acc:10471]                                              | ILMN_1801504 | RUNX1         |
| inhibitor of DNA binding 3, dominant negative helix-loop-helix protein [Source:HGNC Symbol;Acc:5362]            | ILMN_1732296 | ID3           |
| basic helix-loop-helix family, member e40 [Source:HGNC Symbol;Acc:1046]                                         | ILMN_1768534 | BHLHE40       |
| zinc finger, BED-type containing 5 [Source:HGNC Symbol;Acc:30803]                                               | ILMN_1664424 | ZBED5         |
| STAR-related lipid transfer (START) domain containing 13 [Source:HGNC Symbol;Acc:19164]                         | ILMN_2341254 | STARID13      |
| translocation associated membrane protein 2 [Source:HGNC Symbol;Acc:16855]                                      | ILMN_1788783 | TRAM2         |
| Yae1 domain containing 1 [Source:HGNC Symbol;Acc:24857]                                                         | ILMN_1793508 | YAE1D1        |
| angiopoietin-like 4 [Source:HGNC Symbol;Acc:16039]                                                              | ILMN_1707727 | ANGPTL4       |
| perilipin 2 [Source:HGNC Symbol;Acc:248]                                                                        | ILMN_2138765 | PLIN2         |
| CDC42 effector protein (Rho GTPase binding) 4 [Source:HGNC Symbol;Acc:17147]                                    | ILMN_1745223 | CDC42EP4      |
| SRY (sex determining region Y)-box 8 [Source:HGNC Symbol;Acc:11203]                                             | ILMN_1789244 | SOX8          |
| bone morphogenetic protein 2 [Source:HGNC Symbol;Acc:1069]                                                      | ILMN_1722718 | BMP2          |
| forkhead box J2 [Source:HGNC Symbol;Acc:24818]                                                                  | ILMN_1731648 | FOXJ2         |
| chondroitin sulfate synthase 1 [Source:HGNC Symbol;Acc:17198]                                                   | ILMN_1791576 | CHSY1         |
| solute carrier family 20 (phosphate transporter), member 1 [Source:HGNC Symbol;Acc:10946]                       | ILMN_1672662 | SLC20A1       |
| kelch-like family member 9 [Source:HGNC Symbol;Acc:18732]                                                       | ILMN_1664466 | KLHL9         |
| zinc finger CCCH-type containing 10 [Source:HGNC Symbol;Acc:25893]                                              | ILMN_2075847 | ZC3H10        |
| chromosome 10 open reading frame 10 [Source:HGNC Symbol;Acc:23355]                                              | ILMN_1767556 | C10orf10      |
| SMAD family member 6 [Source:HGNC Symbol;Acc:6772]                                                              | ILMN_1767068 | SMAD6         |
|                                                                                                                 | ILMN_1844692 | RP11-815I9.4  |
| zinc finger protein 503 [Source:HGNC Symbol;Acc:23589]                                                          | ILMN_1787265 | ZNF503        |
| zinc finger protein 22 [Source:HGNC Symbol;Acc:13012]                                                           | ILMN_1798533 | ZNF22         |
| zinc finger protein 22 [Source:HGNC Symbol;Acc:13012]                                                           | ILMN_2117904 | ZNF22         |
| RAMP2 antisense RNA 1 [Source:HGNC Symbol;Acc:44358]                                                            | ILMN_3294106 | RAMP2-AS1     |
|                                                                                                                 | ILMN_2315979 | AC104698.1    |
| forkhead box O1 [Source:HGNC Symbol;Acc:3819]                                                                   | ILMN_1738816 | FOXO1         |
| upregulator of cell proliferation [Source:HGNC Symbol;Acc:30890]                                                | ILMN_2386818 | URGCP         |
| Dab, mitogen-responsive phosphoprotein, homolog 2 (Drosophila) [Source:HGNC Symbol;Acc:2662]                    | ILMN_2128428 | DAB2          |
| Dab, mitogen-responsive phosphoprotein, homolog 2 (Drosophila) [Source:HGNC Symbol;Acc:2662]                    | ILMN_1764228 | DAB2          |
| peroxisome proliferator-activated receptor gamma, coactivator-related 1 [Source:HGNC Symbol;Acc:30025]          | ILMN_1796210 | PPRC1         |
| mitogen-activated protein kinase kinase kinase 8 [Source:HGNC Symbol;Acc:6860]                                  | ILMN_1741159 | MAP3K8        |
| Nipped-B homolog (Drosophila) [Source:HGNC Symbol;Acc:28862]                                                    | ILMN_2264625 | NIPBL         |
| B-cell CLL/lymphoma 3 [Source:HGNC Symbol;Acc:998]                                                              | ILMN_1710514 | BCL3          |
| forkhead box O3 [Source:HGNC Symbol;Acc:3821]                                                                   | ILMN_1844692 | FOXO3         |
| GTP binding protein overexpressed in skeletal muscle [Source:HGNC Symbol;Acc:4234]                              | ILMN_1677092 | GEM           |
| GTP binding protein overexpressed in skeletal muscle [Source:HGNC Symbol;Acc:4234]                              | ILMN_2367883 | GEM           |
| Ras association (RalGDS/AF-6) and pleckstrin homology domains 1 [Source:HGNC Symbol;Acc:14436]                  | ILMN_1783846 | RAPH1         |
| TSC2 domain family, member 1 [Source:HGNC Symbol;Acc:16826]                                                     | ILMN_1787567 | TSC2D1        |
| HCG20425, isoform CRA_a; Uncharacterized protein; cDNA FLJ53815 [Source:UniProtKB/TrEMBL;Acc:B4DNA4]            | ILMN_3244323 | RP4-758J18.2  |
| nucleoporin 153kDa [Source:HGNC Symbol;Acc:8062]                                                                | ILMN_1705907 | NUP153        |
| immediate early response 5-like [Source:HGNC Symbol;Acc:23679]                                                  | ILMN_1755620 | IER5L         |
| leucine carboxyl methyltransferase 2 [Source:HGNC Symbol;Acc:17558]                                             | ILMN_1667577 | LCMT2         |
| K(lysine) acetyltransferase 6A [Source:HGNC Symbol;Acc:13013]                                                   | ILMN_2095840 | KAT6A         |
| CCAAT/enhancer binding protein (C/EBP), beta [Source:HGNC Symbol;Acc:1834]                                      | ILMN_1693014 | CEBPB         |
| nitric oxide synthase 2, inducible [Source:HGNC Symbol;Acc:7873]                                                | ILMN_3249361 | NOS2          |
| nitric oxide synthase 2, inducible [Source:HGNC Symbol;Acc:7873]                                                | ILMN_2322831 | NOS2          |
| protein phosphatase 1, regulatory subunit 3C [Source:HGNC Symbol;Acc:9293]                                      | ILMN_1736670 | PPP1R3C       |
| SERTA domain containing 2 [Source:HGNC Symbol;Acc:30784]                                                        | ILMN_1651347 | SERTAD2       |
| myosin X [Source:HGNC Symbol;Acc:7593]                                                                          | ILMN_2232712 | MYO10         |
| nicotinamide N-methyltransferase [Source:HGNC Symbol;Acc:7861]                                                  | ILMN_1715508 | NNMT          |
| MROH7-TTC4 readthrough (NMD candidate) [Source:HGNC Symbol;Acc:49180]                                           | ILMN_1678140 | MROH7-TTC4    |
| MID1 interacting protein 1 [Source:HGNC Symbol;Acc:20715]                                                       | ILMN_2165473 | MID1IP1       |
| tetrapeptide repeat domain 4 [Source:HGNC Symbol;Acc:12394]                                                     | ILMN_1678140 | TTC4          |
| inhibitor of DNA binding 2, dominant negative helix-loop-helix protein [Source:HGNC Symbol;Acc:5361]            | ILMN_2086095 | ID2           |
| inhibitor of DNA binding 2, dominant negative helix-loop-helix protein [Source:HGNC Symbol;Acc:5361]            | ILMN_1793990 | ID2           |
| pleckstrin homology domain containing, family F (with FYVE domain) member 1 [Source:HGNC Symbol;Acc:20764]      | ILMN_1708041 | PLEKHF1       |
| tripartite motif containing 47 [Source:HGNC Symbol;Acc:19020]                                                   | ILMN_1712708 | TRIM47        |
| GLTSCR1-like [Source:HGNC Symbol;Acc:21111]                                                                     | ILMN_1696127 | GLTSCR1L      |
| B-cell translocation gene 1, anti-proliferative [Source:HGNC Symbol;Acc:1130]                                   | ILMN_1775743 | BTG1          |
| heme oxygenase (decycling) 1 [Source:HGNC Symbol;Acc:5013]                                                      | ILMN_1800512 | HMOX1         |
| family with sequence similarity 46, member A [Source:HGNC Symbol;Acc:18345]                                     | ILMN_1740466 | FAM46A        |
| ankyrin repeat domain 37 [Source:HGNC Symbol;Acc:29593]                                                         | ILMN_1756417 | ANKRD37       |
| La ribonucleoprotein domain family, member 6 [Source:HGNC Symbol;Acc:24012]                                     | ILMN_1752810 | LARP6         |

mRNAs with half life <6 hours in all samples examined

|                                                                                                                   |              |               |
|-------------------------------------------------------------------------------------------------------------------|--------------|---------------|
| Norrie disease (pseudoglioma) [Source:HGNC Symbol;Acc:7678]                                                       | ILMN 1794803 | NDP           |
| kelch-like ECH-associated protein 1 [Source:HGNC Symbol;Acc:23177]                                                | ILMN 2410771 | KEAP1         |
| TSPY-like 5 [Source:HGNC Symbol;Acc:29367]                                                                        | ILMN 1737972 | TSPYL5        |
| forkhead box C1 [Source:HGNC Symbol;Acc:3800]                                                                     | ILMN 1738401 | FOXC1         |
| phosphodiesterase 4B, cAMP-specific [Source:HGNC Symbol;Acc:8781]                                                 | ILMN 2340259 | PDE4B         |
| CCAAT/enhancer binding protein (C/EBP), delta [Source:HGNC Symbol;Acc:1835]                                       | ILMN 1782050 | CEBPD         |
| adrenoceptor beta 2, surface [Source:HGNC Symbol;Acc:286]                                                         | ILMN 1695590 | ADRB2         |
| zinc finger protein 876, pseudogene [Source:HGNC Symbol;Acc:32472]                                                | ILMN 3226663 | ZNF876P       |
| zinc finger protein 263 [Source:HGNC Symbol;Acc:13056]                                                            | ILMN 1692620 | ZNF263        |
| DNA meiotic recombinase 1 [Source:HGNC Symbol;Acc:2927]                                                           | ILMN 2162367 | DMC1          |
| TRAF3 interacting protein 2 [Source:HGNC Symbol;Acc:1343]                                                         | ILMN 1701514 | TRAF3IP2      |
|                                                                                                                   | ILMN 3227321 | RP11-747H12.5 |
| sprouty homolog 2 (Drosophila) [Source:HGNC Symbol;Acc:11270]                                                     | ILMN 2089329 | SPRY2         |
| snail family zinc finger 2 [Source:HGNC Symbol;Acc:11094]                                                         | ILMN 1665740 | SNAI2         |
| snail family zinc finger 2 [Source:HGNC Symbol;Acc:11094]                                                         | ILMN 2082585 | SNAI2         |
| forkhead box D1 [Source:HGNC Symbol;Acc:3802]                                                                     | ILMN 1704418 | FOXD1         |
| dual specificity phosphatase 1 [Source:HGNC Symbol;Acc:3064]                                                      | ILMN 1781285 | DUSP1         |
| B-cell CLL/lymphoma 6 [Source:HGNC Symbol;Acc:1001]                                                               | ILMN 1737314 | BCL6          |
| Kruppel-like factor 9 [Source:HGNC Symbol;Acc:1123]                                                               | ILMN 1778523 | KLF9          |
| XK, Kell blood group complex subunit-related family, member 8 [Source:HGNC Symbol;Acc:25508]                      | ILMN 2087303 | XKR8          |
| vacuolar protein sorting 37 homolog B (S. cerevisiae) [Source:HGNC Symbol;Acc:25754]                              | ILMN 1710427 | VPS37B        |
| RNA binding motif protein 23 [Source:HGNC Symbol;Acc:20155]                                                       | ILMN 2363106 | RBM23         |
| RNA binding motif protein 23 [Source:HGNC Symbol;Acc:20155]                                                       | ILMN 1780756 | RBM23         |
| inhibitor of DNA binding 1, dominant negative helix-loop-helix protein [Source:HGNC Symbol;Acc:5360]              | ILMN 1664861 | ID1           |
| BCL2-like 1 [Source:HGNC Symbol;Acc:992]                                                                          | ILMN 1654118 | BCL2L1        |
| zinc finger, AN1-type domain 5 [Source:HGNC Symbol;Acc:13008]                                                     | ILMN 1795228 | ZFAND5        |
| mutS homolog 6 [Source:HGNC Symbol;Acc:7329]                                                                      | ILMN 1729051 | MSH6          |
| glucosaminyl (N-acetyl) transferase 1, core 2 [Source:HGNC Symbol;Acc:4203]                                       | ILMN 1666545 | GCNT1         |
| inositol 1,4,5-trisphosphate receptor interacting protein [Source:HGNC Symbol;Acc:29370]                          | ILMN 1805192 | ITPRIP        |
| inositol 1,4,5-trisphosphate receptor interacting protein [Source:HGNC Symbol;Acc:29370]                          | ILMN 3239181 | ITPRIP        |
| pelota homolog (Drosophila) [Source:HGNC Symbol;Acc:8829]                                                         | ILMN 1770811 | PELO          |
| AT rich interactive domain 5B (MRF1-like) [Source:HGNC Symbol;Acc:17362]                                          | ILMN 1721626 | ARID5B        |
| kelch-like family member 21 [Source:HGNC Symbol;Acc:29041]                                                        | ILMN 1692785 | KLHL21        |
| cysteine-rich, angiogenic inducer, 61 [Source:HGNC Symbol;Acc:2654]                                               | ILMN 2188264 | CYR61         |
| nuclear receptor binding factor 2 [Source:HGNC Symbol;Acc:19692]                                                  | ILMN 3237385 | NRFBF2        |
| chromodomain helicase DNA binding protein 9 [Source:HGNC Symbol;Acc:25701]                                        | ILMN 1762972 | CHD9          |
| chromosome 16 open reading frame 72 [Source:HGNC Symbol;Acc:30103]                                                | ILMN 1773407 | C16orf72      |
| CXXC finger protein 5 [Source:HGNC Symbol;Acc:26943]                                                              | ILMN 1745256 | CXXC5         |
| CXXC finger protein 5 [Source:HGNC Symbol;Acc:26943]                                                              | ILMN 3307729 | CXXC5         |
| TD (carboxy-terminal domain, RNA polymerase II, polypeptide A) small phosphatase 2 [Source:HGNC Symbol;Acc:1707]  | ILMN 1692962 | CTDSP2        |
| ERBB receptor feedback inhibitor 1 [Source:HGNC Symbol;Acc:18185]                                                 | ILMN 1665510 | ERRFI1        |
| succinate dehydrogenase complex assembly factor 1 [Source:HGNC Symbol;Acc:33867]                                  | ILMN 2070355 | SDHAF1        |
| growth arrest-specific 1 [Source:HGNC Symbol;Acc:4165]                                                            | ILMN 1772910 | GAS1          |
| splA/ryanodine receptor domain and SOCS box containing 1 [Source:HGNC Symbol;Acc:30628]                           | ILMN 1714170 | SPSB1         |
| IMP3, U3 small nuclear ribonucleoprotein, homolog (yeast) [Source:HGNC Symbol;Acc:14497]                          | ILMN 1733696 | IMP3          |
| nuclear factor, interleukin 3 regulated [Source:HGNC Symbol;Acc:7787]                                             | ILMN 1707312 | NFIL3         |
| syntabulin (syntaxin-interacting) [Source:HGNC Symbol;Acc:26011]                                                  | ILMN 1738989 | SYBU          |
| lysine-rich coiled-coil 1 [Source:HGNC Symbol;Acc:28039]                                                          | ILMN 2091375 | KRCC1         |
| lysine-rich coiled-coil 1 [Source:HGNC Symbol;Acc:28039]                                                          | ILMN 1745620 | KRCC1         |
| leucine zipper, down-regulated in cancer 1-like [Source:HGNC Symbol;Acc:13343]                                    | ILMN 1691425 | LDOC1L        |
| hypoxia inducible lipid droplet-associated [Source:HGNC Symbol;Acc:28859]                                         | ILMN 1659990 | HILPDA        |
| cysteine-rich hydrophobic domain 2 [Source:HGNC Symbol;Acc:1935]                                                  | ILMN 1679428 | CHIC2         |
| PHD finger protein 21A [Source:HGNC Symbol;Acc:24156]                                                             | ILMN 1699496 | PHF21A        |
| ubiquitin C [Source:HGNC Symbol;Acc:12468]                                                                        | ILMN 2038773 | UBC           |
| ubiquitin C [Source:HGNC Symbol;Acc:12468]                                                                        | ILMN 2331501 | UBC           |
| ring finger protein 216 pseudogene 1 [Source:HGNC Symbol;Acc:33610]                                               | ILMN 3225534 | RNF216P1      |
| growth arrest and DNA-damage-inducible, beta [Source:HGNC Symbol;Acc:4096]                                        | ILMN 1718977 | GADD45B       |
| tumor necrosis factor receptor superfamily, member 1B [Source:HGNC Symbol;Acc:11917]                              | ILMN 1764788 | TNFRSF1B      |
| Kruppel-like factor 4 (gut) [Source:HGNC Symbol;Acc:6348]                                                         | ILMN 1779857 | KLF4          |
| Kruppel-like factor 4 (gut) [Source:HGNC Symbol;Acc:6348]                                                         | ILMN 2137789 | KLF4          |
| AAR2 splicing factor homolog (S. cerevisiae) [Source:HGNC Symbol;Acc:15886]                                       | ILMN 1721225 | AAR2          |
| FERM domain containing 6 [Source:HGNC Symbol;Acc:19839]                                                           | ILMN 2330787 | FRMD6         |
| FERM domain containing 6 [Source:HGNC Symbol;Acc:19839]                                                           | ILMN 1769282 | FRMD6         |
| BRF2, RNA polymerase III transcription initiation factor 50 kDa subunit [Source:HGNC Symbol;Acc:17298]            | ILMN 1665554 | BRF2          |
| lipoma HMGIC fusion partner-like 2 [Source:HGNC Symbol;Acc:6588]                                                  | ILMN 1747744 | LHFP2         |
| 6-phosphofructo-2-kinase/fructose-2,6-bisphosphatase 4 [Source:HGNC Symbol;Acc:8875]                              | ILMN 1653292 | PFKFB4        |
| v-ets avian erythroblastosis virus E26 oncogene homolog 1 [Source:HGNC Symbol;Acc:3488]                           | ILMN 2122103 | ETS1          |
| v-ets avian erythroblastosis virus E26 oncogene homolog 1 [Source:HGNC Symbol;Acc:3488]                           | ILMN 1687538 | ETS1          |
| Rho/Rac guanine nucleotide exchange factor (GEF) 2 [Source:HGNC Symbol;Acc:682]                                   | ILMN 1703477 | ARHGEF2       |
| E3 ubiquitin-protein ligase RNF31 [Source:UniProtKB/TrEMBL;Acc:HOYM83]                                            | ILMN 1745471 | RP11-468E2.4  |
| interferon regulatory factor 9 [Source:HGNC Symbol;Acc:6131]                                                      | ILMN 1745471 | IRF9          |
| arginine vasopressin-induced 1 [Source:HGNC Symbol;Acc:30898]                                                     | ILMN 1671731 | AVP1          |
| 6-phosphofructo-2-kinase/fructose-2,6-bisphosphatase 3 [Source:HGNC Symbol;Acc:8874]                              | ILMN 2186061 | PFKFB3        |
| RAS, dexamethasone-induced 1 [Source:HGNC Symbol;Acc:15828]                                                       | ILMN 1740426 | RASD1         |
| Kruppel-like factor 2 (lung) [Source:HGNC Symbol;Acc:6347]                                                        | ILMN 1735930 | KLF2          |
| DNA-damage-inducible transcript 4-like [Source:HGNC Symbol;Acc:30555]                                             | ILMN 1696637 | DDIT4L        |
| tumor necrosis factor receptor superfamily, member 1A [Source:HGNC Symbol;Acc:11916]                              | ILMN 1685005 | TNFRSF1A      |
| nuclear factor of kappa light polypeptide gene enhancer in B-cells inhibitor, zeta [Source:HGNC Symbol;Acc:29805] | ILMN 1719695 | NFKBIZ        |
| spen homolog, transcriptional regulator (Drosophila) [Source:HGNC Symbol;Acc:17575]                               | ILMN 1802611 | SPEN          |
| v-maf avian musculoaponeurotic fibrosarcoma oncogene homolog B [Source:HGNC Symbol;Acc:6408]                      | ILMN 1764709 | MAFB          |
| A kinase (PRKA) anchor protein 13 [Source:HGNC Symbol;Acc:371]                                                    | ILMN 2396956 | AKAP13        |
| SCO2 cytochrome c oxidase assembly protein [Source:HGNC Symbol;Acc:10604]                                         | ILMN 1701621 | SCO2          |
| autism susceptibility candidate 2 [Source:HGNC Symbol;Acc:14262]                                                  | ILMN 1749081 | AUTS2         |
| serum/glucocorticoid regulated kinase 1 [Source:HGNC Symbol;Acc:10810]                                            | ILMN 3229324 | SGK1          |
| serum/glucocorticoid regulated kinase 1 [Source:HGNC Symbol;Acc:10810]                                            | ILMN 3305938 | SGK1          |
| serum/glucocorticoid regulated kinase 1 [Source:HGNC Symbol;Acc:10810]                                            | ILMN 1702487 | SGK1          |
| distal-less homeobox 5 [Source:HGNC Symbol;Acc:2918]                                                              | ILMN 1759598 | DLX5          |
| ST3 beta-galactoside alpha-2,3-sialyltransferase 1 [Source:HGNC Symbol;Acc:10862]                                 | ILMN 1683313 | ST3GAL1       |
| platelet-activating factor acetylhydrolase 1b, regulatory subunit 1 (45kDa) [Source:HGNC Symbol;Acc:8574]         | ILMN 1722276 | PAFAH1B1      |
| nerve growth factor (beta polypeptide) [Source:HGNC Symbol;Acc:7808]                                              | ILMN 1716608 | NGF           |
| T-box 15 [Source:HGNC Symbol;Acc:11594]                                                                           | ILMN 1721580 | TBX15         |
| baculoviral IAP repeat containing 3 [Source:HGNC Symbol;Acc:591]                                                  | ILMN 2405684 | BIRC3         |
| potassium channel tetramerization domain containing 6 [Source:HGNC Symbol;Acc:22235]                              | ILMN 2146372 | KCTD6         |
| Rho family GTPase 3 [Source:HGNC Symbol;Acc:671]                                                                  | ILMN 1759513 | RND3          |
| thioredoxin interacting protein [Source:HGNC Symbol;Acc:16952]                                                    | ILMN 1697448 | TXNIP         |
| HMG-box transcription factor 1 [Source:HGNC Symbol;Acc:23200]                                                     | ILMN 1685415 | HBP1          |
| peroxisomal biogenesis factor 11 beta [Source:HGNC Symbol;Acc:8853]                                               | ILMN 1678546 | PEX11B        |
| SIX homeobox 4 [Source:HGNC Symbol;Acc:10890]                                                                     | ILMN 1743402 | SIX4          |
| adhesion molecule with Ig-like domain 3 [Source:HGNC Symbol;Acc:24075]                                            | ILMN 3187328 | AMIGO3        |
| adhesion molecule with Ig-like domain 3 [Source:HGNC Symbol;Acc:24075]                                            | ILMN 1700231 | AMIGO3        |
| inositol hexakisphosphate kinase 1 [Source:HGNC Symbol;Acc:18360]                                                 | ILMN 3187328 | IP6K1         |
| inositol hexakisphosphate kinase 1 [Source:HGNC Symbol;Acc:18360]                                                 | ILMN 1700231 | IP6K1         |
| phosphoinositide-3-kinase, regulatory subunit 1 (alpha) [Source:HGNC Symbol;Acc:8979]                             | ILMN 1760303 | PIK3R1        |
| golgin, RAB6-interacting [Source:HGNC Symbol;Acc:25676]                                                           | ILMN 1761911 | GORAB         |
| regulator of G-protein signaling 16 [Source:HGNC Symbol;Acc:9997]                                                 | ILMN 1808226 | RGS16         |
| regulator of G-protein signaling 2, 24kDa [Source:HGNC Symbol;Acc:9998]                                           | ILMN 2197365 | RGS2          |
| lysine (K)-specific demethylase 5B [Source:HGNC Symbol;Acc:18039]                                                 | ILMN 1755727 | KDM5B         |

## GeneSet2miRNA Output

| <u>microRNA model</u> | <u>I_A</u> | <u>I_B</u>  | <u>odds ratio</u> | <u>p-value</u> | <u>Genes</u>                                                                            |
|-----------------------|------------|-------------|-------------------|----------------|-----------------------------------------------------------------------------------------|
| HSA-MIR-410.5         | 6 (112)    | 67 (15441)  | 12.35             | 0.0077         | ADM ETS1 RGS16 CITED2 FAM46A KLHL9                                                      |
| HSA-MIR-323-3P.5      | 5 (112)    | 77 (15441)  | 8.95              | 0.01           | PDE4B SGK1 AUTS2 FAM46A IRF2BPL                                                         |
| HSA-MIR-200B.5        | 11 (112)   | 406 (15441) | 3.74              | 0.01           | RND3 DUSP1 ETS1 GEM IRS1 NRIP1 KLF4 CITED2 KANK1 ERRF1 XKR8                             |
| HSA-MIR-200C.4        | 16 (112)   | 857 (15441) | 2.57              | 0.01           | RND3 DUSP1 ETS1 GEM ID2 IRS1 SNAI2 NRIP1 KLF4 CITED2 KANK1 ZC3H4 ERRF1 XKR8 NFKBIZ FRM  |
| HSA-MIR-200B.4        | 17 (112)   | 901 (15441) | 2.6               | 0.01           | RND3 KLF9 DUSP1 ETS1 GEM ID2 IRS1 SNAI2 NRIP1 KLF4 CITED2 KANK1 ZC3H4 ERRF1 XKR8 NFKBIZ |
| HSA-MIR-200C.5        | 11 (112)   | 382 (15441) | 3.97              | 0.01           | RND3 DUSP1 ETS1 ID2 IRS1 NRIP1 KLF4 CITED2 KANK1 ERRF1 XKR8                             |
| HSA-MIR-429.4         | 18 (112)   | 870 (15441) | 2.85              | 0.01           | RND3 KLF9 CEBPD DUSP1 ETS1 GEM ID2 IRS1 SNAI2 NRIP1 KLF4 CITED2 KANK1 ZC3H4 ERRF1 XKR8  |
