# Supplementary material for: Transcriptome-Wide Analysis of Messenger RNA Decay in Normal and Osteoarthritic Human Articular Chondrocytes
Source: PubMed Central journal article supplement (PMC4233952; doi:10.1002/art.38849), 2014-10-26
Supplement: art0066-3052-sd3.pdf [file art0066-3052-sd3.pdf]

Tew et al - Transcriptome-wide analysis of mRNA decay in normal and osteoarthritic human articular cartilage

### **Supplemental Data 3**

This contains comparisons of mRNA half lives between normal and osteoarthritic chondrocytes. Genes in these comparisons have a >2 fold change in half life and are considered significant if they exhibit a false discovery rate (FDR) < 0.05.

#### **Column Headings:**

Illumina\_ID

Gene ID - official gene symbol

Normal\_HL - mean mRNA half life in normal chondrocytes (hours)

Intact\_HL - mean mRNA half life in Intact osteoarthritic chondrocytes (hours)

Fibrillated\_HL - mean mRNA half life in fibrillated osteoarthritic chondrocytes (hours)

OA\_HL - mean mRNA half life in all osteoarthritic chondrocytes (hours)

Normal\_HL:OA\_HL - Ratio of mean mRNA half life in Normal and all OA datasets

FDR - False Discovery Rate for comparison indicated by tab name

| Illumina_ID  | GENE ID       | Normal_HL | Intact_HL | Fibrillated_HL | OA_HL | Normal_HL:<br>OA_HL | FDR     |
|--------------|---------------|-----------|-----------|----------------|-------|---------------------|---------|
| ILMN_1734611 | RP11-404P21.8 | 14.3      | 2.1       | 2.4            | 2.3   | 6.3                 | 4.4E-03 |
| ILMN_1734611 | BDKRB1        | 14.3      | 2.1       | 2.4            | 2.3   | 6.3                 | 4.4E-03 |
| ILMN_1670926 | CHST15        | 16.8      | 2.6       | 3.0            | 2.8   | 6.1                 | 4.7E-03 |
| ILMN_1692056 | HS3ST3A1      | 18.9      | 3.3       | 3.7            | 3.5   | 5.4                 | 2.1E-03 |
| ILMN_1741404 | MSC           | 17.6      | 2.8       | 4.2            | 3.5   | 5.0                 | 5.7E-03 |
| ILMN_1809364 | NTF3          | 24.0      | 5.0       | 5.8            | 5.4   | 4.5                 | 1.3E-09 |
| ILMN_1796471 | GDF5          | 14.8      | 3.0       | 3.7            | 3.3   | 4.4                 | 1.1E-02 |
| ILMN_1673566 | ADAMTS1       | 17.6      | 4.0       | 4.1            | 4.0   | 4.4                 | 5.1E-03 |
| ILMN_1691846 | GOS2          | 10.0      | 2.3       | 2.5            | 2.4   | 4.2                 | 2.2E-02 |
| ILMN_1787691 | CITED4        | 10.4      | 2.6       | 2.4            | 2.5   | 4.2                 | 2.1E-02 |
| ILMN_1735045 | A4GALT        | 15.4      | 3.6       | 4.0            | 3.8   | 4.1                 | 3.7E-03 |
| ILMN_3237270 | MARCH3        | 13.9      | 3.3       | 3.7            | 3.5   | 4.0                 | 1.1E-02 |
| ILMN_1792978 | HAS2          | 16.6      | 5.4       | 3.1            | 4.2   | 3.9                 | 5.2E-03 |
| ILMN_1707350 | TUSC1         | 10.9      | 2.6       | 3.0            | 2.8   | 3.9                 | 1.9E-02 |
| ILMN_1671142 | GPR68         | 18.8      | 4.6       | 5.2            | 4.9   | 3.8                 | 3.6E-03 |
| ILMN_1702973 | EVA1A         | 23.4      | 8.9       | 3.6            | 6.3   | 3.7                 | 3.3E-03 |
| ILMN_1795317 | SCAND1        | 15.5      | 4.5       | 3.9            | 4.2   | 3.7                 | 8.0E-03 |
| ILMN_1798459 | PPAN-P2RY11   | 11.1      | 3.3       | 2.7            | 3.0   | 3.7                 | 1.8E-02 |
| ILMN_1798459 | PPAN          | 11.1      | 3.3       | 2.7            | 3.0   | 3.7                 | 1.8E-02 |
| ILMN_1812702 | SIX1          | 9.6       | 2.3       | 3.0            | 2.6   | 3.6                 | 2.8E-02 |
| ILMN_1747227 | ADORA1        | 12.7      | 3.3       | 3.8            | 3.5   | 3.6                 | 2.0E-02 |
| ILMN_1745271 | EXOSC4        | 14.0      | 4.6       | 3.1            | 3.9   | 3.6                 | 1.6E-02 |
| ILMN_1745271 | EXOSC4        | 14.0      | 4.6       | 3.1            | 3.9   | 3.6                 | 1.6E-02 |
| ILMN_1819384 | VTRNA1-3      | 12.9      | 3.4       | 3.9            | 3.6   | 3.6                 | 1.2E-02 |
| ILMN_1794914 | UBTD1         | 13.3      | 3.2       | 4.3            | 3.7   | 3.6                 | 1.9E-02 |
| ILMN_1811258 | RELB          | 20.1      | 5.4       | 6.0            | 5.7   | 3.5                 | 3.8E-03 |
| ILMN_3239378 | TADA2B        | 13.8      | 4.5       | 3.3            | 3.9   | 3.5                 | 1.9E-02 |
| ILMN_1754969 | LMCD1         | 9.8       | 2.8       | 2.8            | 2.8   | 3.5                 | 2.7E-02 |
| ILMN_1654385 | ASB13         | 9.0       | 2.7       | 2.4            | 2.6   | 3.5                 | 2.8E-02 |
| ILMN_2111237 | MN1           | 8.2       | 2.4       | 2.4            | 2.4   | 3.5                 | 4.7E-02 |
| ILMN_1671891 | PID1          | 15.5      | 3.4       | 5.5            | 4.5   | 3.5                 | 5.2E-03 |
| ILMN_1653001 | CABLES1       | 15.0      | 4.5       | 4.2            | 4.3   | 3.5                 | 9.6E-03 |
| ILMN_1699644 | MARCH3        | 17.7      | 4.7       | 5.6            | 5.1   | 3.5                 | 6.9E-03 |
| ILMN_1913678 | IRAK3         | 19.1      | 4.4       | 6.7            | 5.5   | 3.5                 | 3.6E-03 |
| ILMN_1717706 | PLK2          | 17.0      | 5.1       | 4.9            | 5.0   | 3.4                 | 1.2E-02 |
| ILMN_1677402 | C11orf96      | 7.0       | 2.0       | 2.1            | 2.1   | 3.4                 | 1.7E-02 |
| ILMN_1714700 | TRIB2         | 11.9      | 3.2       | 3.9            | 3.5   | 3.4                 | 1.8E-02 |
| ILMN_1795930 | PTGER4        | 13.7      | 3.7       | 4.4            | 4.1   | 3.4                 | 2.0E-02 |
| ILMN_1779428 | C12orf68      | 15.0      | 4.5       | 4.4            | 4.5   | 3.4                 | 1.2E-02 |
| ILMN_1760412 | SHISA2        | 16.8      | 4.5       | 5.7            | 5.1   | 3.3                 | 3.8E-03 |
| ILMN_1794122 | ZNF79         | 15.3      | 5.3       | 4.0            | 4.7   | 3.3                 | 1.4E-02 |
| ILMN_1781001 | SOCS3         | 12.0      | 4.4       | 2.9            | 3.7   | 3.3                 | 2.1E-02 |
| ILMN_1726809 | BHLHE41       | 11.3      | 3.2       | 3.7            | 3.4   | 3.3                 | 2.3E-02 |
| ILMN_1672121 | C12orf68      | 11.0      | 3.5       | 3.2            | 3.4   | 3.3                 | 2.0E-02 |
| ILMN_2166972 | BBS12         | 17.4      | 5.7       | 5.0            | 5.3   | 3.3                 | 8.0E-03 |
| ILMN_1747409 | MT1L          | 20.0      | 7.0       | 5.4            | 6.2   | 3.2                 | 4.7E-03 |
| ILMN_1741628 | ABL2          | 17.2      | 5.4       | 5.3            | 5.3   | 3.2                 | 8.8E-03 |
| ILMN_2376723 | CDKN2B        | 10.5      | 3.3       | 3.2            | 3.3   | 3.2                 | 1.5E-02 |
| ILMN_1652486 | THAP7         | 14.6      | 4.8       | 4.3            | 4.6   | 3.2                 | 1.8E-02 |
| ILMN_1796737 | ZBTB7C        | 12.0      | 4.1       | 3.5            | 3.8   | 3.2                 | 2.1E-02 |
| ILMN_1751171 | IRF2BP1       | 16.2      | 6.6       | 3.6            | 5.1   | 3.2                 | 2.0E-02 |
| ILMN_1794501 | HAS3          | 22.8      | 9.4       | 5.1            | 7.2   | 3.2                 | 3.5E-03 |
| ILMN_1742782 | GPANK1        | 17.3      | 5.6       | 5.4            | 5.5   | 3.2                 | 9.0E-03 |
| ILMN_1752914 | ARHGAP31      | 16.8      | 5.9       | 4.9            | 5.4   | 3.1                 | 1.3E-02 |
| ILMN_1771601 | UFSP1         | 16.8      | 6.3       | 4.4            | 5.4   | 3.1                 | 1.1E-02 |
| ILMN_3194638 | EVA1A         | 24.0      | 9.2       | 6.3            | 7.7   | 3.1                 | 2.5E-05 |

|              |          |      |     |      |     |     |         |
|--------------|----------|------|-----|------|-----|-----|---------|
| ILMN_2197128 | OSR1     | 8.9  | 2.7 | 3.0  | 2.9 | 3.1 | 4.3E-02 |
| ILMN_1690839 | PPAPDC3  | 11.9 | 3.7 | 4.0  | 3.8 | 3.1 | 1.8E-02 |
| ILMN_1811468 | IRX3     | 20.0 | 9.0 | 3.9  | 6.5 | 3.1 | 1.2E-02 |
| ILMN_1693004 | SOGA1    | 16.2 | 5.0 | 5.5  | 5.2 | 3.1 | 8.2E-03 |
| ILMN_2232368 | PCIF1    | 14.3 | 4.7 | 4.6  | 4.6 | 3.1 | 1.6E-02 |
| ILMN_2406304 | PDZRN3   | 17.9 | 5.1 | 6.6  | 5.8 | 3.1 | 7.7E-03 |
| ILMN_1765746 | SFT2D3   | 18.3 | 6.7 | 5.2  | 6.0 | 3.1 | 4.5E-03 |
| ILMN_1680856 | MAMLD1   | 18.8 | 6.8 | 5.5  | 6.1 | 3.1 | 4.9E-03 |
| ILMN_1746579 | UBE2O    | 10.5 | 3.3 | 3.5  | 3.4 | 3.1 | 2.4E-02 |
| ILMN_1669046 | FOXQ1    | 24.0 | 9.3 | 6.5  | 7.9 | 3.0 | 3.1E-03 |
| ILMN_1657679 | VAV3     | 14.4 | 4.5 | 5.0  | 4.7 | 3.0 | 1.1E-02 |
| ILMN_1682034 | HEY2     | 24.0 | 9.3 | 6.7  | 8.0 | 3.0 | 1.4E-06 |
| ILMN_1801833 | ARHGAP24 | 15.4 | 4.7 | 5.6  | 5.1 | 3.0 | 4.1E-03 |
| ILMN_1672660 | MBP      | 20.1 | 8.8 | 4.6  | 6.7 | 3.0 | 1.2E-02 |
| ILMN_1736093 | SNX33    | 8.8  | 3.0 | 2.9  | 2.9 | 3.0 | 4.8E-02 |
| ILMN_1900270 | ETS1     | 13.3 | 4.1 | 4.8  | 4.4 | 3.0 | 2.1E-02 |
| ILMN_1701441 | LPAR1    | 12.6 | 3.6 | 4.8  | 4.2 | 3.0 | 1.7E-02 |
| ILMN_1732197 | MN1      | 9.8  | 3.3 | 3.3  | 3.3 | 3.0 | 3.0E-02 |
| ILMN_1658094 | ZNF365   | 18.9 | 6.5 | 6.2  | 6.4 | 3.0 | 4.7E-03 |
| ILMN_2391891 | MAP2K5   | 18.1 | 6.3 | 5.9  | 6.1 | 2.9 | 6.1E-03 |
| ILMN_1651438 | ZFPM1    | 9.0  | 3.3 | 2.8  | 3.1 | 2.9 | 4.4E-02 |
| ILMN_1913060 | CMKLR1   | 11.8 | 4.1 | 3.9  | 4.0 | 2.9 | 1.6E-02 |
| ILMN_1741021 | CH25H    | 24.0 | 4.5 | 11.9 | 8.2 | 2.9 | 4.6E-03 |
| ILMN_1807050 | SHC4     | 18.9 | 5.4 | 7.6  | 6.5 | 2.9 | 1.9E-03 |
| ILMN_2399463 | VAV3     | 16.2 | 8.1 | 3.1  | 5.6 | 2.9 | 3.7E-02 |
| ILMN_1660031 | P2RY6    | 21.5 | 7.6 | 7.2  | 7.4 | 2.9 | 8.7E-04 |
| ILMN_1679217 | FAM110B  | 6.2  | 2.1 | 2.1  | 2.1 | 2.9 | 1.8E-02 |
| ILMN_1727553 | C5orf54  | 13.2 | 5.2 | 3.8  | 4.5 | 2.9 | 2.2E-02 |
| ILMN_1677429 | TWIST2   | 19.2 | 7.1 | 6.1  | 6.6 | 2.9 | 3.8E-03 |
| ILMN_3305466 | ZNF788   | 13.9 | 4.8 | 4.8  | 4.8 | 2.9 | 1.6E-02 |
| ILMN_3305466 | ZNF788   | 13.9 | 4.8 | 4.8  | 4.8 | 2.9 | 1.6E-02 |
| ILMN_2373444 | ADORA1   | 18.6 | 5.9 | 7.0  | 6.4 | 2.9 | 4.3E-03 |
| ILMN_1672908 | TWIST1   | 17.0 | 4.7 | 7.1  | 5.9 | 2.9 | 1.4E-02 |
| ILMN_1782922 | PDE4B    | 5.8  | 2.0 | 2.0  | 2.0 | 2.9 | 2.1E-02 |
| ILMN_3245707 | RIMKLB   | 22.2 | 7.0 | 8.4  | 7.7 | 2.9 | 1.5E-04 |
| ILMN_1651767 | MKL1     | 14.9 | 5.6 | 4.7  | 5.2 | 2.9 | 1.6E-02 |
| ILMN_1677962 | GPHN     | 11.1 | 4.3 | 3.5  | 3.9 | 2.9 | 1.1E-02 |
| ILMN_2372915 | P2RY2    | 18.4 | 5.7 | 7.2  | 6.4 | 2.9 | 6.0E-03 |
| ILMN_2402600 | GLIS3    | 10.9 | 3.4 | 4.2  | 3.8 | 2.9 | 2.4E-02 |
| ILMN_1713803 | C17orf97 | 13.5 | 5.7 | 3.8  | 4.7 | 2.9 | 2.4E-02 |
| ILMN_1703955 | FBXO32   | 9.5  | 4.2 | 2.4  | 3.3 | 2.9 | 2.1E-02 |
| ILMN_1719232 | DGCR14   | 15.0 | 6.1 | 4.4  | 5.3 | 2.9 | 1.6E-02 |
| ILMN_2153466 | FAM50B   | 8.6  | 2.9 | 3.1  | 3.0 | 2.8 | 2.2E-02 |
| ILMN_1746465 | FJX1     | 13.2 | 5.9 | 3.5  | 4.7 | 2.8 | 2.1E-02 |
| ILMN_1765001 | NAT6     | 14.0 | 4.6 | 5.3  | 5.0 | 2.8 | 1.8E-02 |
| ILMN_1727671 | SSH1     | 20.3 | 7.3 | 7.1  | 7.2 | 2.8 | 2.4E-03 |
| ILMN_1672589 | SEMA4B   | 11.9 | 5.1 | 3.3  | 4.2 | 2.8 | 2.0E-02 |
| ILMN_1681886 | ADAMTS5  | 19.7 | 6.3 | 7.7  | 7.0 | 2.8 | 3.0E-03 |
| ILMN_2169736 | PGBD4    | 20.4 | 7.2 | 7.3  | 7.3 | 2.8 | 2.1E-03 |
| ILMN_1690252 | ALKBH2   | 13.9 | 4.9 | 5.0  | 4.9 | 2.8 | 2.0E-02 |
| ILMN_1655796 | MARCH3   | 15.1 | 4.8 | 6.0  | 5.4 | 2.8 | 1.5E-02 |
| ILMN_1805543 | ADAMTS9  | 17.7 | 5.3 | 7.4  | 6.3 | 2.8 | 9.1E-03 |
| ILMN_1677432 | SRGAP1   | 20.9 | 6.7 | 8.4  | 7.6 | 2.8 | 3.6E-03 |
| ILMN_1659537 | MED8     | 14.2 | 5.9 | 4.5  | 5.2 | 2.8 | 2.2E-02 |
| ILMN_1795704 | KIAA0232 | 12.9 | 5.3 | 4.1  | 4.7 | 2.7 | 1.8E-02 |
| ILMN_2226304 | ANKRD50  | 6.8  | 2.5 | 2.4  | 2.5 | 2.7 | 3.5E-02 |
| ILMN_2413572 | MARK2    | 14.8 | 4.8 | 6.0  | 5.4 | 2.7 | 1.6E-02 |
| ILMN_1659106 | PHLDA3   | 14.0 | 4.1 | 6.1  | 5.1 | 2.7 | 2.5E-02 |

|              |             |      |      |      |     |     |         |
|--------------|-------------|------|------|------|-----|-----|---------|
| ILMN_3235312 | MAFG-AS1    | 16.6 | 5.3  | 6.9  | 6.1 | 2.7 | 1.8E-02 |
| ILMN_1683932 | ZNF425      | 15.5 | 6.2  | 5.2  | 5.7 | 2.7 | 7.8E-03 |
| ILMN_1681949 | PDGFRA      | 13.1 | 3.8  | 5.9  | 4.8 | 2.7 | 3.1E-02 |
| ILMN_1798926 | SOCS2       | 12.7 | 4.9  | 4.5  | 4.7 | 2.7 | 3.6E-03 |
| ILMN_1728071 | KRAS        | 14.1 | 4.8  | 5.6  | 5.2 | 2.7 | 1.9E-02 |
| ILMN_1792951 | ZHX2        | 7.0  | 2.6  | 2.6  | 2.6 | 2.7 | 2.9E-02 |
| ILMN_1849186 | ZNF704      | 20.2 | 6.6  | 8.4  | 7.5 | 2.7 | 5.3E-03 |
| ILMN_1757847 | C11orf68    | 13.9 | 5.3  | 5.1  | 5.2 | 2.7 | 1.8E-02 |
| ILMN_1682081 | RNF19B      | 8.8  | 3.4  | 3.1  | 3.3 | 2.7 | 2.8E-02 |
| ILMN_1685109 | POLR3D      | 16.1 | 6.9  | 5.0  | 6.0 | 2.7 | 1.1E-02 |
| ILMN_1736628 | AC135048.13 | 15.2 | 6.2  | 5.2  | 5.7 | 2.7 | 1.9E-02 |
| ILMN_1736628 | ORAI3       | 15.2 | 6.2  | 5.2  | 5.7 | 2.7 | 1.9E-02 |
| ILMN_1783606 | KMT2E       | 10.5 | 3.9  | 4.0  | 3.9 | 2.7 | 1.8E-02 |
| ILMN_1838942 | MT2A        | 10.2 | 3.8  | 3.9  | 3.8 | 2.7 | 3.6E-02 |
| ILMN_1711005 | CDC25A      | 18.6 | 9.8  | 4.1  | 6.9 | 2.7 | 1.9E-02 |
| ILMN_3307906 | PALMD       | 8.0  | 3.0  | 3.0  | 3.0 | 2.7 | 8.7E-04 |
| ILMN_1701998 | AFAP1       | 16.3 | 6.2  | 6.1  | 6.2 | 2.6 | 4.9E-03 |
| ILMN_2400322 | DYRK3       | 9.7  | 3.8  | 3.6  | 3.7 | 2.6 | 1.4E-02 |
| ILMN_1717799 | PRKCE       | 19.4 | 7.1  | 7.7  | 7.4 | 2.6 | 6.3E-03 |
| ILMN_1737650 | DIO2        | 23.1 | 7.2  | 10.4 | 8.8 | 2.6 | 1.7E-03 |
| ILMN_2399304 | NAV2        | 19.2 | 6.1  | 8.5  | 7.3 | 2.6 | 3.7E-03 |
| ILMN_3272768 | LINC00339   | 17.3 | 6.9  | 6.3  | 6.6 | 2.6 | 1.5E-02 |
| ILMN_3251298 | THNSL1      | 12.0 | 4.9  | 4.3  | 4.6 | 2.6 | 2.0E-02 |
| ILMN_1680111 | AHDC1       | 16.4 | 5.5  | 7.1  | 6.3 | 2.6 | 2.0E-02 |
| ILMN_1678494 | ZNF438      | 13.7 | 5.4  | 5.1  | 5.2 | 2.6 | 2.4E-02 |
| ILMN_1757237 | ASAP2       | 19.0 | 7.3  | 7.3  | 7.3 | 2.6 | 7.6E-03 |
| ILMN_1717639 | SIK1        | 19.4 | 10.3 | 4.6  | 7.5 | 2.6 | 1.7E-02 |
| ILMN_1743933 | TSHZ3       | 13.5 | 5.8  | 4.6  | 5.2 | 2.6 | 1.3E-02 |
| ILMN_1813641 | TOR4A       | 13.5 | 4.7  | 5.7  | 5.2 | 2.6 | 1.8E-02 |
| ILMN_1734440 | VIPAS39     | 14.9 | 5.5  | 6.0  | 5.8 | 2.6 | 1.6E-02 |
| ILMN_1740200 | USP18       | 15.7 | 6.3  | 5.9  | 6.1 | 2.6 | 1.2E-02 |
| ILMN_2386444 | ANGPTL4     | 10.5 | 3.6  | 4.5  | 4.1 | 2.6 | 1.2E-02 |
| ILMN_1683178 | JAK2        | 8.9  | 3.2  | 3.7  | 3.4 | 2.6 | 3.3E-02 |
| ILMN_1807072 | GOSR2       | 21.1 | 9.3  | 7.1  | 8.2 | 2.6 | 3.5E-03 |
| ILMN_1675756 | KCNJ15      | 23.8 | 9.8  | 8.8  | 9.3 | 2.6 | 3.0E-04 |
| ILMN_1695485 | FAM225A     | 20.2 | 6.6  | 9.1  | 7.9 | 2.6 | 5.4E-03 |
| ILMN_1813489 | RAF1        | 15.8 | 6.3  | 6.1  | 6.2 | 2.5 | 1.7E-02 |
| ILMN_1787541 | SPSB2       | 12.3 | 5.3  | 4.4  | 4.8 | 2.5 | 2.2E-02 |
| ILMN_1737005 | SMG9        | 12.1 | 5.1  | 4.4  | 4.8 | 2.5 | 2.2E-02 |
| ILMN_1722891 | CHST10      | 20.6 | 7.6  | 8.6  | 8.1 | 2.5 | 4.6E-03 |
| ILMN_2106902 | FOXN3       | 13.6 | 5.0  | 5.7  | 5.4 | 2.5 | 2.4E-02 |
| ILMN_1764723 | SH3PXD2B    | 16.9 | 7.2  | 6.1  | 6.6 | 2.5 | 1.1E-02 |
| ILMN_2390526 | RARB        | 22.7 | 9.9  | 8.0  | 8.9 | 2.5 | 9.8E-06 |
| ILMN_1763634 | PEX14       | 11.7 | 4.7  | 4.5  | 4.6 | 2.5 | 2.8E-02 |
| ILMN_1704472 | EID2        | 9.7  | 4.6  | 3.0  | 3.8 | 2.5 | 3.2E-02 |
| ILMN_1774387 | ZHX3        | 18.1 | 7.5  | 6.7  | 7.1 | 2.5 | 5.6E-03 |
| ILMN_1754921 | FAM43B      | 12.0 | 4.3  | 5.2  | 4.7 | 2.5 | 1.8E-02 |
| ILMN_1780334 | KCNJ2       | 17.8 | 4.2  | 9.8  | 7.0 | 2.5 | 2.0E-02 |
| ILMN_2367258 | SMOX        | 12.3 | 3.7  | 6.0  | 4.9 | 2.5 | 1.8E-02 |
| ILMN_1795218 | MIR1226     | 18.7 | 7.7  | 7.1  | 7.4 | 2.5 | 4.1E-03 |
| ILMN_1795218 | DHX30       | 18.7 | 7.7  | 7.1  | 7.4 | 2.5 | 4.1E-03 |
| ILMN_1720771 | STX11       | 11.4 | 4.9  | 4.1  | 4.5 | 2.5 | 4.0E-02 |
| ILMN_1738816 | FOXO1       | 4.5  | 1.8  | 1.8  | 1.8 | 2.5 | 1.8E-02 |
| ILMN_1718968 | MT1E        | 6.6  | 2.7  | 2.6  | 2.6 | 2.5 | 3.0E-02 |
| ILMN_1705066 | BTBD11      | 8.3  | 2.7  | 3.9  | 3.3 | 2.5 | 4.8E-02 |
| ILMN_1668639 | TBC1D10B    | 13.7 | 6.1  | 4.8  | 5.5 | 2.5 | 2.8E-02 |
| ILMN_3240901 | ZBTB7C      | 15.2 | 7.3  | 4.8  | 6.1 | 2.5 | 3.1E-02 |
| ILMN_2391345 | RPP25L      | 18.1 | 7.5  | 7.0  | 7.2 | 2.5 | 8.0E-03 |

|              |               |      |      |      |      |     |         |
|--------------|---------------|------|------|------|------|-----|---------|
| ILMN_2391345 | DCTN3         | 18.1 | 7.5  | 7.0  | 7.2  | 2.5 | 8.0E-03 |
| ILMN_2211122 | TRAPPC2P1     | 16.1 | 5.3  | 7.6  | 6.5  | 2.5 | 1.0E-02 |
| ILMN_1668411 | FHL2          | 10.0 | 3.8  | 4.2  | 4.0  | 2.5 | 3.8E-02 |
| ILMN_1743367 | FZD4          | 12.7 | 5.2  | 5.0  | 5.1  | 2.5 | 2.0E-02 |
| ILMN_1733045 | RAB36         | 18.7 | 7.3  | 7.7  | 7.5  | 2.5 | 5.1E-03 |
| ILMN_1793522 | PRKAB1        | 13.8 | 6.1  | 5.0  | 5.5  | 2.5 | 1.9E-02 |
| ILMN_1713486 | RNF25         | 16.8 | 8.1  | 5.4  | 6.8  | 2.5 | 9.1E-03 |
| ILMN_2074258 | BARD1         | 23.6 | 11.3 | 7.6  | 9.5  | 2.5 | 3.7E-03 |
| ILMN_1789243 | VPS33B        | 11.7 | 5.4  | 4.0  | 4.7  | 2.5 | 2.6E-02 |
| ILMN_2207393 | CNOT3         | 18.5 | 8.6  | 6.3  | 7.4  | 2.5 | 1.6E-02 |
| ILMN_1736828 | CHST10        | 9.1  | 3.8  | 3.6  | 3.7  | 2.5 | 2.4E-02 |
| ILMN_1726704 | DDI2          | 17.0 | 8.7  | 5.1  | 6.9  | 2.5 | 2.0E-02 |
| ILMN_1726704 | RSC1A1        | 17.0 | 8.7  | 5.1  | 6.9  | 2.5 | 2.0E-02 |
| ILMN_3256471 | FAM87A        | 20.3 | 8.2  | 8.2  | 8.2  | 2.5 | 8.0E-03 |
| ILMN_3256471 | FAM87B        | 20.3 | 8.2  | 8.2  | 8.2  | 2.5 | 8.0E-03 |
| ILMN_1752520 | SLFN11        | 18.7 | 8.1  | 7.0  | 7.6  | 2.5 | 1.5E-02 |
| ILMN_1699249 | ZNF649        | 14.8 | 5.8  | 6.2  | 6.0  | 2.5 | 1.5E-02 |
| ILMN_1773959 | ST6GALNAC5    | 21.8 | 10.0 | 7.6  | 8.8  | 2.5 | 5.1E-03 |
| ILMN_1656335 | RIT1          | 12.3 | 5.4  | 4.6  | 5.0  | 2.5 | 2.1E-02 |
| ILMN_1744239 | FEM1B         | 15.1 | 6.9  | 5.3  | 6.1  | 2.5 | 1.8E-02 |
| ILMN_1793474 | INSIG1        | 10.0 | 4.0  | 4.1  | 4.1  | 2.5 | 3.7E-02 |
| ILMN_1701477 | CCDC101       | 17.5 | 7.2  | 7.0  | 7.1  | 2.5 | 1.5E-02 |
| ILMN_1860638 | ST3GAL1       | 6.7  | 2.8  | 2.7  | 2.7  | 2.5 | 1.9E-02 |
| ILMN_2072178 | ECHDC3        | 11.6 | 4.6  | 4.8  | 4.7  | 2.5 | 9.1E-03 |
| ILMN_1801610 | METRNL        | 14.1 | 5.5  | 6.0  | 5.8  | 2.5 | 2.2E-02 |
| ILMN_1672295 | ZC3H12A       | 10.1 | 4.8  | 3.5  | 4.1  | 2.5 | 2.0E-02 |
| ILMN_1723198 | CDKN2B        | 17.4 | 8.1  | 6.1  | 7.1  | 2.5 | 7.2E-03 |
| ILMN_1737360 | TSPY26P       | 8.2  | 3.6  | 3.1  | 3.4  | 2.4 | 1.5E-02 |
| ILMN_1741356 | PRICKLE1      | 10.8 | 5.0  | 3.8  | 4.4  | 2.4 | 3.7E-02 |
| ILMN_1746846 | TTLL4         | 13.3 | 4.9  | 5.9  | 5.4  | 2.4 | 2.0E-02 |
| ILMN_1757956 | PCGF1         | 12.1 | 5.4  | 4.5  | 5.0  | 2.4 | 1.9E-02 |
| ILMN_1674376 | ANGPTL4       | 12.9 | 6.2  | 4.3  | 5.3  | 2.4 | 1.3E-02 |
| ILMN_1657898 | SEC14L2       | 16.5 | 8.9  | 4.7  | 6.8  | 2.4 | 1.8E-02 |
| ILMN_1657898 | RP4-539M6.19  | 16.5 | 8.9  | 4.7  | 6.8  | 2.4 | 1.8E-02 |
| ILMN_1657898 | MTFP1         | 16.5 | 8.9  | 4.7  | 6.8  | 2.4 | 1.8E-02 |
| ILMN_1797031 | HSPBAP1       | 15.4 | 7.7  | 4.9  | 6.3  | 2.4 | 1.8E-02 |
| ILMN_1705733 | RPRD2         | 16.4 | 6.3  | 7.2  | 6.7  | 2.4 | 2.1E-02 |
| ILMN_1705733 | RPRD2         | 16.4 | 6.3  | 7.2  | 6.7  | 2.4 | 2.1E-02 |
| ILMN_1705266 | RELA          | 15.0 | 5.7  | 6.7  | 6.2  | 2.4 | 1.9E-02 |
| ILMN_1652185 | IL4R          | 18.9 | 9.9  | 5.7  | 7.8  | 2.4 | 1.9E-02 |
| ILMN_1744240 | TBC1D31       | 20.1 | 10.6 | 6.0  | 8.3  | 2.4 | 1.5E-02 |
| ILMN_1714741 | RP11-395G23.3 | 19.8 | 9.1  | 7.2  | 8.2  | 2.4 | 3.7E-03 |
| ILMN_2175265 | TMEM11        | 12.4 | 6.4  | 3.8  | 5.1  | 2.4 | 3.7E-02 |
| ILMN_1718129 | MAP2K5        | 15.4 | 7.2  | 5.6  | 6.4  | 2.4 | 1.8E-02 |
| ILMN_2358540 | RBMS1P1       | 14.4 | 4.8  | 7.1  | 5.9  | 2.4 | 8.1E-03 |
| ILMN_2358540 | RBMS1         | 14.4 | 4.8  | 7.1  | 5.9  | 2.4 | 8.1E-03 |
| ILMN_1718907 | TSHZ1         | 9.8  | 4.2  | 3.9  | 4.0  | 2.4 | 2.8E-02 |
| ILMN_1676905 | TIGD7         | 9.3  | 3.9  | 3.9  | 3.9  | 2.4 | 1.4E-02 |
| ILMN_3234997 | MAP7D1        | 10.3 | 3.9  | 4.7  | 4.3  | 2.4 | 3.5E-02 |
| ILMN_1734410 | BNIP1         | 12.4 | 6.1  | 4.2  | 5.2  | 2.4 | 2.6E-02 |
| ILMN_3271098 | EVA1A         | 24.0 | 9.2  | 10.8 | 10.0 | 2.4 | 2.3E-03 |
| ILMN_2075603 | MRGPRF        | 11.8 | 4.6  | 5.3  | 4.9  | 2.4 | 3.6E-02 |
| ILMN_1797191 | KIAA0040      | 17.9 | 8.3  | 6.6  | 7.5  | 2.4 | 1.2E-02 |
| ILMN_1786310 | MVK           | 14.3 | 6.9  | 5.0  | 5.9  | 2.4 | 1.3E-02 |
| ILMN_1776213 | RGMB          | 20.1 | 9.7  | 7.1  | 8.4  | 2.4 | 9.1E-03 |
| ILMN_2391750 | SFMBT1        | 14.7 | 7.8  | 4.5  | 6.1  | 2.4 | 2.1E-02 |
| ILMN_1705570 | H2AFY2        | 17.2 | 7.2  | 7.2  | 7.2  | 2.4 | 1.0E-02 |
| ILMN_1748283 | PIM2          | 20.6 | 10.9 | 6.3  | 8.6  | 2.4 | 1.5E-02 |

|              |                 |      |      |      |      |     |         |
|--------------|-----------------|------|------|------|------|-----|---------|
| ILMN_1854469 | BICC1           | 15.0 | 5.6  | 6.9  | 6.3  | 2.4 | 1.8E-02 |
| ILMN_2234710 | C12orf60        | 16.4 | 8.7  | 5.1  | 6.9  | 2.4 | 2.4E-02 |
| ILMN_1772910 | GAS1            | 3.6  | 1.4  | 1.6  | 1.5  | 2.4 | 2.8E-02 |
| ILMN_1692896 | JMJD4           | 13.6 | 7.1  | 4.3  | 5.7  | 2.4 | 2.8E-02 |
| ILMN_1882248 | USP51           | 15.2 | 6.4  | 6.3  | 6.4  | 2.4 | 2.0E-02 |
| ILMN_1705442 | CMTM3           | 18.3 | 7.1  | 8.2  | 7.7  | 2.4 | 6.2E-03 |
| ILMN_1665217 | CEP19           | 24.0 | 8.9  | 11.3 | 10.1 | 2.4 | 4.7E-05 |
| ILMN_1666502 | SOBP            | 10.6 | 4.6  | 4.3  | 4.4  | 2.4 | 3.5E-02 |
| ILMN_1807372 | SPECC1L-ADORA2A | 20.0 | 7.2  | 9.6  | 8.4  | 2.4 | 2.0E-02 |
| ILMN_1807372 | ADORA2A         | 20.0 | 7.2  | 9.6  | 8.4  | 2.4 | 2.0E-02 |
| ILMN_1801124 | MSANTD4         | 4.9  | 2.2  | 1.9  | 2.1  | 2.4 | 2.4E-02 |
| ILMN_1728228 | ZNF548          | 13.9 | 5.3  | 6.4  | 5.8  | 2.4 | 2.2E-02 |
| ILMN_2389347 | NR3C1           | 12.4 | 4.9  | 5.5  | 5.2  | 2.4 | 3.1E-02 |
| ILMN_1807515 | CSTF2T          | 14.2 | 6.5  | 5.5  | 6.0  | 2.4 | 2.4E-02 |
| ILMN_3241262 | PABPC4L         | 22.3 | 9.4  | 9.3  | 9.4  | 2.4 | 2.4E-03 |
| ILMN_1718831 | TMEM57          | 16.0 | 6.0  | 7.6  | 6.8  | 2.4 | 1.4E-02 |
| ILMN_1660288 | ZNF503-AS2      | 21.7 | 9.0  | 9.4  | 9.2  | 2.4 | 2.1E-03 |
| ILMN_2339655 | MAPK7           | 10.0 | 4.5  | 4.0  | 4.2  | 2.4 | 3.5E-02 |
| ILMN_1684086 | BDKRB2          | 22.1 | 8.5  | 10.2 | 9.4  | 2.4 | 6.1E-03 |
| ILMN_1691702 | ZNF775          | 18.1 | 6.0  | 9.3  | 7.7  | 2.4 | 1.3E-02 |
| ILMN_1703324 | PDSS1           | 20.2 | 10.4 | 6.7  | 8.6  | 2.4 | 1.4E-02 |
| ILMN_1700168 | LARS2           | 17.6 | 9.9  | 5.0  | 7.5  | 2.4 | 2.2E-02 |
| ILMN_1686929 | GPATCH3         | 13.7 | 7.0  | 4.7  | 5.8  | 2.4 | 1.8E-02 |
| ILMN_3245310 | CCDC94          | 15.0 | 7.1  | 5.7  | 6.4  | 2.3 | 2.0E-02 |
| ILMN_1669142 | NAA15           | 19.8 | 8.3  | 8.5  | 8.4  | 2.3 | 1.5E-02 |
| ILMN_2362232 | ZNF331          | 9.1  | 3.9  | 3.9  | 3.9  | 2.3 | 1.3E-02 |
| ILMN_1734276 | PMEPA1          | 21.9 | 8.0  | 10.6 | 9.3  | 2.3 | 2.3E-03 |
| ILMN_2055156 | PAG1            | 22.6 | 12.0 | 7.3  | 9.6  | 2.3 | 4.6E-03 |
| ILMN_1764851 | TP53RK          | 11.0 | 6.0  | 3.5  | 4.7  | 2.3 | 3.9E-02 |
| ILMN_3248511 | FAM167A         | 24.0 | 9.3  | 11.2 | 10.3 | 2.3 | 3.7E-03 |
| ILMN_1654566 | HSPA1L          | 13.3 | 6.2  | 5.2  | 5.7  | 2.3 | 1.1E-02 |
| ILMN_2374244 | DYRK2           | 13.9 | 6.6  | 5.2  | 5.9  | 2.3 | 2.0E-02 |
| ILMN_1657148 | CIRBP-AS1       | 23.3 | 11.3 | 8.6  | 10.0 | 2.3 | 1.6E-04 |
| ILMN_1672834 | SSH2            | 16.1 | 6.6  | 7.1  | 6.9  | 2.3 | 1.5E-02 |
| ILMN_1739840 | LRRC8A          | 16.5 | 6.5  | 7.6  | 7.0  | 2.3 | 8.1E-03 |
| ILMN_1811650 | DUS2            | 17.3 | 7.4  | 7.4  | 7.4  | 2.3 | 6.1E-03 |
| ILMN_1681135 | SPATA2          | 16.0 | 6.9  | 6.8  | 6.8  | 2.3 | 1.5E-02 |
| ILMN_1752810 | LARP6           | 4.8  | 2.1  | 2.0  | 2.1  | 2.3 | 3.4E-02 |
| ILMN_1739156 | DOPEY1          | 16.5 | 6.7  | 7.4  | 7.1  | 2.3 | 2.1E-02 |
| ILMN_2212590 | TMEM170A        | 17.9 | 10.5 | 4.9  | 7.7  | 2.3 | 2.5E-02 |
| ILMN_1757627 | ZMYND19         | 16.9 | 9.7  | 4.8  | 7.3  | 2.3 | 2.4E-02 |
| ILMN_1770850 | PNMA1           | 16.0 | 5.5  | 8.2  | 6.9  | 2.3 | 1.4E-02 |
| ILMN_1770850 | ELMSAN1         | 16.0 | 5.5  | 8.2  | 6.9  | 2.3 | 1.4E-02 |
| ILMN_1716608 | NGF             | 5.0  | 2.1  | 2.2  | 2.1  | 2.3 | 2.4E-02 |
| ILMN_1658834 | ZC3H18          | 18.4 | 7.2  | 8.7  | 7.9  | 2.3 | 4.9E-03 |
| ILMN_1789596 | ETV6            | 12.6 | 5.3  | 5.5  | 5.4  | 2.3 | 2.3E-02 |
| ILMN_1763641 | ZNF614          | 12.3 | 5.1  | 5.5  | 5.3  | 2.3 | 2.7E-02 |
| ILMN_1764770 | OXNAD1          | 14.7 | 7.5  | 5.2  | 6.4  | 2.3 | 2.8E-02 |
| ILMN_1793732 | FARS2           | 12.4 | 5.3  | 5.4  | 5.3  | 2.3 | 1.8E-02 |
| ILMN_1771962 | GLI3            | 12.7 | 5.0  | 6.0  | 5.5  | 2.3 | 2.1E-02 |
| ILMN_1778168 | ELMO2           | 17.9 | 7.6  | 8.0  | 7.8  | 2.3 | 7.7E-03 |
| ILMN_1809708 | KCTD21          | 13.0 | 5.5  | 5.9  | 5.7  | 2.3 | 1.5E-02 |
| ILMN_1677261 | LZTS1           | 11.9 | 5.1  | 5.2  | 5.2  | 2.3 | 3.0E-02 |
| ILMN_1682930 | SIPA1           | 15.9 | 7.2  | 6.6  | 6.9  | 2.3 | 1.4E-02 |
| ILMN_1794230 | SCAND1          | 19.7 | 7.9  | 9.3  | 8.6  | 2.3 | 3.6E-03 |
| ILMN_1669982 | RP11-482H16.1   | 11.7 | 3.7  | 6.5  | 5.1  | 2.3 | 4.9E-02 |
| ILMN_1669982 | CCDC85A         | 11.7 | 3.7  | 6.5  | 5.1  | 2.3 | 4.9E-02 |
| ILMN_1805330 | KLHL26          | 17.8 | 8.8  | 6.8  | 7.8  | 2.3 | 1.4E-02 |

|              |               |      |      |      |      |     |         |
|--------------|---------------|------|------|------|------|-----|---------|
| ILMN_2342066 | METRNL        | 14.7 | 5.9  | 6.9  | 6.4  | 2.3 | 2.0E-02 |
| ILMN_1809040 | LDLRAP1       | 15.8 | 6.8  | 6.9  | 6.9  | 2.3 | 1.7E-02 |
| ILMN_2357134 | SPHK1         | 23.4 | 9.5  | 11.0 | 10.2 | 2.3 | 4.6E-03 |
| ILMN_1684197 | GPKOW         | 22.0 | 11.0 | 8.3  | 9.6  | 2.3 | 8.6E-03 |
| ILMN_1696684 | FAM90A1       | 22.7 | 9.5  | 10.4 | 9.9  | 2.3 | 3.6E-03 |
| ILMN_2246956 | BCL2          | 11.4 | 4.4  | 5.5  | 5.0  | 2.3 | 3.4E-02 |
| ILMN_1764788 | TNFRSF1B      | 4.9  | 2.2  | 2.0  | 2.1  | 2.3 | 2.4E-02 |
| ILMN_1806487 | FAM109B       | 10.7 | 4.1  | 5.2  | 4.7  | 2.3 | 1.8E-02 |
| ILMN_3215206 | SMN2          | 22.1 | 11.7 | 7.6  | 9.7  | 2.3 | 6.9E-03 |
| ILMN_3215206 | SMN1          | 22.1 | 11.7 | 7.6  | 9.7  | 2.3 | 6.9E-03 |
| ILMN_1815718 | BTRC          | 16.5 | 8.0  | 6.5  | 7.2  | 2.3 | 1.8E-02 |
| ILMN_1740345 | THYN1         | 18.5 | 8.3  | 8.0  | 8.1  | 2.3 | 1.4E-02 |
| ILMN_1807042 | MARCKS        | 17.3 | 9.6  | 5.6  | 7.6  | 2.3 | 3.6E-02 |
| ILMN_1790460 | ZNF574        | 17.4 | 8.2  | 7.1  | 7.6  | 2.3 | 1.8E-02 |
| ILMN_1687275 | AJUBA         | 15.7 | 9.1  | 4.7  | 6.9  | 2.3 | 4.5E-02 |
| ILMN_1803312 | DIMT1         | 13.3 | 7.0  | 4.7  | 5.8  | 2.3 | 2.8E-02 |
| ILMN_3310840 | MIR21         | 14.9 | 7.9  | 5.2  | 6.6  | 2.3 | 1.5E-02 |
| ILMN_3310840 | VMP1          | 14.9 | 7.9  | 5.2  | 6.6  | 2.3 | 1.5E-02 |
| ILMN_1652008 | KNSTRN        | 22.1 | 11.9 | 7.5  | 9.7  | 2.3 | 6.9E-03 |
| ILMN_1665384 | SH3BP5L       | 15.1 | 7.1  | 6.2  | 6.7  | 2.3 | 2.0E-02 |
| ILMN_1741585 | SFMBT1        | 18.4 | 10.8 | 5.5  | 8.1  | 2.3 | 2.0E-02 |
| ILMN_1671005 | IRF2BP2       | 7.8  | 3.9  | 3.0  | 3.4  | 2.3 | 2.0E-02 |
| ILMN_1658830 | WBP1L         | 5.6  | 2.7  | 2.3  | 2.5  | 2.3 | 1.2E-02 |
| ILMN_1705035 | FBXL7         | 16.7 | 6.8  | 7.9  | 7.4  | 2.3 | 1.8E-02 |
| ILMN_1695108 | RSPO2         | 17.7 | 5.9  | 9.8  | 7.8  | 2.3 | 2.3E-02 |
| ILMN_3245057 | ASAP1         | 18.9 | 6.9  | 9.8  | 8.4  | 2.3 | 3.2E-03 |
| ILMN_1756935 | OSBPL6        | 20.1 | 11.8 | 6.0  | 8.9  | 2.3 | 1.9E-02 |
| ILMN_1784655 | TLCD1         | 19.1 | 8.5  | 8.4  | 8.5  | 2.3 | 9.0E-03 |
| ILMN_1810274 | HOXB2         | 21.3 | 12.7 | 6.1  | 9.4  | 2.3 | 8.0E-03 |
| ILMN_1812297 | CYP26B1       | 10.4 | 4.5  | 4.7  | 4.6  | 2.3 | 5.0E-02 |
| ILMN_1813701 | RASAL2        | 16.8 | 7.0  | 7.9  | 7.5  | 2.2 | 1.5E-02 |
| ILMN_1772821 | KIAA1671      | 17.0 | 9.4  | 5.7  | 7.6  | 2.2 | 3.0E-02 |
| ILMN_1691293 | RNF185        | 14.5 | 5.3  | 7.7  | 6.5  | 2.2 | 2.4E-02 |
| ILMN_1778876 | FAM179B       | 14.0 | 6.5  | 6.0  | 6.3  | 2.2 | 1.9E-02 |
| ILMN_1751075 | SETD4         | 14.7 | 7.2  | 5.9  | 6.6  | 2.2 | 1.8E-02 |
| ILMN_1705116 | SLC22A23      | 20.3 | 8.4  | 9.7  | 9.1  | 2.2 | 1.1E-02 |
| ILMN_1718285 | HOXC8         | 13.6 | 5.4  | 6.7  | 6.1  | 2.2 | 2.2E-02 |
| ILMN_1673024 | RBM15B        | 15.2 | 9.6  | 4.0  | 6.8  | 2.2 | 4.7E-02 |
| ILMN_1697548 | LPHN2         | 21.0 | 11.3 | 7.4  | 9.4  | 2.2 | 1.1E-02 |
| ILMN_1696048 | MEDAG         | 18.8 | 5.5  | 11.4 | 8.4  | 2.2 | 1.8E-02 |
| ILMN_1729455 | EML1          | 24.0 | 7.3  | 14.3 | 10.8 | 2.2 | 5.1E-03 |
| ILMN_1776674 | SAC3D1        | 11.5 | 5.6  | 4.7  | 5.2  | 2.2 | 4.0E-02 |
| ILMN_1736112 | ARHGAP10      | 10.3 | 4.8  | 4.5  | 4.6  | 2.2 | 4.7E-02 |
| ILMN_1756590 | SYS1          | 15.1 | 8.2  | 5.3  | 6.8  | 2.2 | 3.0E-02 |
| ILMN_1801441 | RFTN2         | 15.5 | 5.6  | 8.3  | 7.0  | 2.2 | 1.9E-02 |
| ILMN_2364535 | CTD-2323K18.1 | 11.3 | 5.1  | 5.1  | 5.1  | 2.2 | 4.7E-02 |
| ILMN_2364535 | SNUPN         | 11.3 | 5.1  | 5.1  | 5.1  | 2.2 | 4.7E-02 |
| ILMN_3245410 | LINC00638     | 20.1 | 7.8  | 10.2 | 9.0  | 2.2 | 9.8E-03 |
| ILMN_1695945 | MEIS2         | 9.2  | 5.2  | 3.1  | 4.1  | 2.2 | 3.4E-02 |
| ILMN_1714170 | SPSB1         | 4.8  | 2.2  | 2.1  | 2.1  | 2.2 | 3.7E-02 |
| ILMN_1739496 | PRRX1         | 9.6  | 3.6  | 5.0  | 4.3  | 2.2 | 2.4E-02 |
| ILMN_2103388 | ZBTB49        | 16.5 | 8.0  | 6.8  | 7.4  | 2.2 | 1.7E-02 |
| ILMN_1785644 | AP5S1         | 14.1 | 6.3  | 6.5  | 6.4  | 2.2 | 3.2E-02 |
| ILMN_1785177 | DNAJC14       | 10.5 | 5.2  | 4.3  | 4.7  | 2.2 | 4.0E-02 |
| ILMN_1729987 | SRC           | 9.8  | 5.1  | 3.8  | 4.4  | 2.2 | 4.8E-02 |
| ILMN_1694923 | PTPN9         | 17.4 | 7.2  | 8.5  | 7.9  | 2.2 | 1.7E-02 |
| ILMN_1799814 | SNRNP40       | 20.5 | 11.5 | 7.1  | 9.3  | 2.2 | 1.2E-02 |
| ILMN_1805590 | NAA38         | 19.9 | 11.0 | 7.0  | 9.0  | 2.2 | 1.8E-02 |

|              |              |      |      |      |      |     |         |
|--------------|--------------|------|------|------|------|-----|---------|
| ILMN_1904628 | S100A6       | 15.5 | 8.7  | 5.3  | 7.0  | 2.2 | 3.5E-02 |
| ILMN_1686454 | TIFA         | 16.9 | 10.5 | 4.8  | 7.7  | 2.2 | 3.6E-02 |
| ILMN_1863185 | RP1-39G22.7  | 12.3 | 6.7  | 4.5  | 5.6  | 2.2 | 4.4E-02 |
| ILMN_3250446 | ZNF626       | 19.6 | 10.0 | 7.8  | 8.9  | 2.2 | 9.2E-03 |
| ILMN_1751051 | C7orf25      | 9.6  | 5.0  | 3.7  | 4.4  | 2.2 | 2.7E-02 |
| ILMN_1751051 | PSMA2        | 9.6  | 5.0  | 3.7  | 4.4  | 2.2 | 2.7E-02 |
| ILMN_1773927 | C12orf61     | 17.8 | 7.4  | 8.8  | 8.1  | 2.2 | 1.6E-02 |
| ILMN_2131493 | MAVS         | 16.0 | 8.3  | 6.2  | 7.3  | 2.2 | 2.0E-02 |
| ILMN_2080611 | PDSS1        | 18.6 | 11.4 | 5.6  | 8.5  | 2.2 | 2.2E-02 |
| ILMN_1815130 | MICALL1      | 21.1 | 9.8  | 9.5  | 9.6  | 2.2 | 7.7E-03 |
| ILMN_1809566 | ZSCAN16      | 15.9 | 9.8  | 4.8  | 7.3  | 2.2 | 4.2E-02 |
| ILMN_2179083 | LOXL4        | 19.1 | 7.2  | 10.3 | 8.7  | 2.2 | 9.3E-03 |
| ILMN_1776181 | BIRC3        | 5.8  | 2.6  | 2.7  | 2.6  | 2.2 | 3.1E-02 |
| ILMN_1727574 | ZNF827       | 13.3 | 6.0  | 6.1  | 6.1  | 2.2 | 7.0E-03 |
| ILMN_1806946 | UBTF         | 19.0 | 8.1  | 9.3  | 8.7  | 2.2 | 9.1E-03 |
| ILMN_1838313 | LRRC8B       | 24.0 | 13.0 | 9.0  | 11.0 | 2.2 | 3.6E-03 |
| ILMN_1666004 | WASL         | 18.7 | 10.3 | 6.9  | 8.6  | 2.2 | 2.0E-02 |
| ILMN_1743034 | KIF1B        | 16.3 | 9.7  | 5.2  | 7.5  | 2.2 | 3.0E-02 |
| ILMN_1743034 | RN7SL731P    | 16.3 | 9.7  | 5.2  | 7.5  | 2.2 | 3.0E-02 |
| ILMN_1829989 | ZEB1-AS1     | 13.4 | 5.8  | 6.5  | 6.2  | 2.2 | 2.0E-02 |
| ILMN_1660847 | PFKFB3       | 13.5 | 6.8  | 5.5  | 6.2  | 2.2 | 3.7E-02 |
| ILMN_1681780 | MKX          | 18.3 | 10.6 | 6.1  | 8.4  | 2.2 | 2.4E-02 |
| ILMN_2157951 | STX6         | 17.1 | 9.9  | 5.7  | 7.8  | 2.2 | 3.9E-02 |
| ILMN_1763328 | GZF1         | 19.1 | 11.5 | 6.0  | 8.7  | 2.2 | 1.9E-02 |
| ILMN_1737254 | USP1         | 15.2 | 9.5  | 4.5  | 7.0  | 2.2 | 4.9E-02 |
| ILMN_1687213 | FAM167A      | 22.1 | 9.7  | 10.7 | 10.2 | 2.2 | 2.1E-03 |
| ILMN_1781906 | RBM17        | 13.6 | 7.6  | 4.9  | 6.3  | 2.2 | 3.7E-02 |
| ILMN_1695290 | FERMT2       | 12.0 | 4.5  | 6.6  | 5.5  | 2.2 | 2.6E-02 |
| ILMN_1664034 | ZNF485       | 18.8 | 11.5 | 5.8  | 8.7  | 2.2 | 1.6E-02 |
| ILMN_1655608 | KLHL18       | 15.1 | 9.4  | 4.6  | 7.0  | 2.2 | 4.9E-02 |
| ILMN_1741976 | SMARCAD1     | 8.8  | 5.1  | 3.0  | 4.0  | 2.2 | 4.7E-02 |
| ILMN_1679655 | WDR82        | 9.1  | 3.9  | 4.6  | 4.2  | 2.2 | 1.5E-02 |
| ILMN_2199298 | TPGS1        | 18.9 | 8.5  | 8.9  | 8.7  | 2.2 | 7.7E-03 |
| ILMN_1687743 | BTBD7        | 10.1 | 5.1  | 4.3  | 4.7  | 2.2 | 2.8E-02 |
| ILMN_2186137 | RRAD         | 19.3 | 6.6  | 11.3 | 9.0  | 2.2 | 2.5E-02 |
| ILMN_3178406 | KLHL29       | 17.5 | 6.5  | 9.8  | 8.1  | 2.2 | 1.8E-02 |
| ILMN_1806845 | ALG3         | 20.4 | 12.0 | 6.9  | 9.5  | 2.2 | 1.5E-02 |
| ILMN_1718712 | FAM217B      | 20.5 | 12.8 | 6.2  | 9.5  | 2.2 | 1.4E-02 |
| ILMN_1708203 | OTUD4        | 17.0 | 10.1 | 5.7  | 7.9  | 2.1 | 2.2E-02 |
| ILMN_1661653 | DET1         | 17.9 | 6.6  | 10.1 | 8.3  | 2.1 | 1.6E-02 |
| ILMN_2376520 | PPP2R3A      | 15.9 | 7.0  | 7.9  | 7.4  | 2.1 | 1.3E-02 |
| ILMN_1718770 | MAMSTR       | 20.9 | 9.5  | 10.1 | 9.8  | 2.1 | 2.2E-03 |
| ILMN_1733863 | UBALD1       | 14.7 | 7.9  | 5.9  | 6.9  | 2.1 | 3.6E-02 |
| ILMN_1673370 | FBXL5        | 17.5 | 9.2  | 7.2  | 8.2  | 2.1 | 1.8E-02 |
| ILMN_1758086 | SNAI1        | 16.7 | 7.3  | 8.4  | 7.8  | 2.1 | 1.2E-02 |
| ILMN_1690546 | PPP3CC       | 8.2  | 4.1  | 3.6  | 3.9  | 2.1 | 4.9E-02 |
| ILMN_1663976 | PDLIM4       | 20.8 | 6.9  | 12.6 | 9.7  | 2.1 | 1.3E-02 |
| ILMN_1691487 | TRAF2        | 16.4 | 7.9  | 7.5  | 7.7  | 2.1 | 1.7E-02 |
| ILMN_1758250 | TRAFD1       | 11.6 | 5.1  | 5.7  | 5.4  | 2.1 | 3.5E-03 |
| ILMN_3238740 | CENPBD1      | 8.4  | 4.4  | 3.4  | 3.9  | 2.1 | 3.4E-02 |
| ILMN_3187254 | RP11-209M4.1 | 16.9 | 10.3 | 5.6  | 7.9  | 2.1 | 4.0E-02 |
| ILMN_1695961 | CLK3         | 18.1 | 11.6 | 5.5  | 8.5  | 2.1 | 2.7E-02 |
| ILMN_1704842 | ARL4A        | 23.3 | 14.2 | 7.7  | 10.9 | 2.1 | 4.4E-03 |
| ILMN_1726368 | ZNF135       | 18.0 | 8.8  | 8.1  | 8.5  | 2.1 | 2.1E-02 |
| ILMN_1741985 | BBS10        | 13.7 | 7.0  | 5.9  | 6.4  | 2.1 | 1.6E-02 |
| ILMN_1695246 | KLHDC8B      | 16.6 | 8.0  | 7.6  | 7.8  | 2.1 | 3.9E-03 |
| ILMN_1693702 | MRFAP1L1     | 18.1 | 7.6  | 9.4  | 8.5  | 2.1 | 9.2E-03 |
| ILMN_1705433 | CBLL1        | 15.6 | 6.9  | 7.8  | 7.4  | 2.1 | 1.9E-02 |



|              |               |      |      |      |      |     |         |
|--------------|---------------|------|------|------|------|-----|---------|
| ILMN_1743275 | SH3RF3        | 20.5 | 9.5  | 9.8  | 9.7  | 2.1 | 1.1E-02 |
| ILMN_1777397 | MSX1          | 15.3 | 9.8  | 4.6  | 7.2  | 2.1 | 4.5E-02 |
| ILMN_2342695 | PDGFA         | 18.8 | 6.9  | 10.9 | 8.9  | 2.1 | 2.9E-02 |
| ILMN_1789775 | WDR74         | 10.6 | 6.1  | 3.9  | 5.0  | 2.1 | 4.6E-02 |
| ILMN_1752283 | ITCH          | 13.6 | 6.5  | 6.4  | 6.4  | 2.1 | 3.7E-02 |
| ILMN_1801121 | SENP2         | 19.4 | 11.2 | 7.2  | 9.2  | 2.1 | 1.8E-02 |
| ILMN_2201966 | N4BP1         | 12.8 | 5.8  | 6.3  | 6.1  | 2.1 | 2.0E-02 |
| ILMN_1705201 | FOXC2         | 14.1 | 7.2  | 6.2  | 6.7  | 2.1 | 3.4E-02 |
| ILMN_2353240 | USF1          | 23.5 | 11.7 | 10.6 | 11.2 | 2.1 | 7.8E-03 |
| ILMN_1754121 | CSK           | 20.5 | 8.6  | 10.8 | 9.7  | 2.1 | 5.1E-03 |
| ILMN_1746276 | EPC1          | 15.7 | 9.2  | 5.7  | 7.5  | 2.1 | 3.3E-02 |
| ILMN_1663772 | SIX2          | 16.5 | 6.5  | 9.2  | 7.9  | 2.1 | 2.3E-02 |
| ILMN_1798256 | UPP1          | 19.8 | 9.5  | 9.3  | 9.4  | 2.1 | 5.6E-03 |
| ILMN_3257145 | ARHGAP42      | 20.9 | 10.5 | 9.4  | 9.9  | 2.1 | 1.1E-02 |
| ILMN_1651692 | STK10         | 18.8 | 10.8 | 7.0  | 8.9  | 2.1 | 1.5E-02 |
| ILMN_1849228 | LINC01096     | 15.3 | 6.9  | 7.6  | 7.3  | 2.1 | 3.1E-02 |
| ILMN_1815759 | CTDP1         | 17.5 | 11.1 | 5.5  | 8.3  | 2.1 | 3.6E-02 |
| ILMN_1882590 | NACC2         | 13.4 | 7.4  | 5.4  | 6.4  | 2.1 | 2.1E-02 |
| ILMN_2200915 | RIPPLY2       | 21.6 | 8.1  | 12.5 | 10.3 | 2.1 | 9.3E-03 |
| ILMN_1813423 | NAA60         | 13.5 | 6.9  | 5.9  | 6.4  | 2.1 | 3.6E-02 |
| ILMN_1813423 | NAA60         | 13.5 | 6.9  | 5.9  | 6.4  | 2.1 | 3.6E-02 |
| ILMN_1857897 | AGAP1         | 20.4 | 10.6 | 8.9  | 9.7  | 2.1 | 1.3E-02 |
| ILMN_1797046 | MTHFSD        | 17.7 | 8.0  | 8.9  | 8.4  | 2.1 | 2.0E-02 |
| ILMN_1759232 | IRS1          | 4.1  | 2.2  | 1.8  | 2.0  | 2.1 | 4.1E-02 |
| ILMN_2100693 | MAP2K4        | 16.2 | 10.1 | 5.3  | 7.7  | 2.1 | 4.2E-02 |
| ILMN_2319952 | VDR           | 17.1 | 10.6 | 5.7  | 8.2  | 2.1 | 4.2E-02 |
| ILMN_3239060 | KRBA1         | 13.8 | 6.8  | 6.4  | 6.6  | 2.1 | 2.0E-02 |
| ILMN_1692219 | RAB11FIP1     | 16.9 | 10.0 | 6.2  | 8.1  | 2.1 | 4.0E-02 |
| ILMN_1809245 | PITPNB        | 10.9 | 5.6  | 4.9  | 5.2  | 2.1 | 3.9E-02 |
| ILMN_1709044 | TGIF2         | 17.2 | 10.4 | 6.1  | 8.2  | 2.1 | 4.0E-02 |
| ILMN_3307719 | ZNF490        | 17.6 | 10.5 | 6.3  | 8.4  | 2.1 | 3.6E-02 |
| ILMN_1688725 | UTP14A        | 18.6 | 11.4 | 6.5  | 8.9  | 2.1 | 2.1E-02 |
| ILMN_1798817 | SDR42E1       | 16.4 | 7.8  | 7.9  | 7.9  | 2.1 | 1.4E-02 |
| ILMN_1751773 | POLD3         | 17.1 | 10.2 | 6.2  | 8.2  | 2.1 | 2.8E-02 |
| ILMN_1742923 | ZNF584        | 19.3 | 7.6  | 10.9 | 9.3  | 2.1 | 1.1E-02 |
| ILMN_3272603 | FAM60A        | 20.4 | 11.2 | 8.4  | 9.8  | 2.1 | 2.0E-02 |
| ILMN_1703511 | PDZRN3        | 12.7 | 5.2  | 7.1  | 6.1  | 2.1 | 3.3E-02 |
| ILMN_1653730 | OXCT2P1       | 14.7 | 6.8  | 7.3  | 7.0  | 2.1 | 2.4E-02 |
| ILMN_1653730 | OXCT2         | 14.7 | 6.8  | 7.3  | 7.0  | 2.1 | 2.4E-02 |
| ILMN_1765500 | NDUFV3        | 12.1 | 5.9  | 5.7  | 5.8  | 2.1 | 3.4E-02 |
| ILMN_2354269 | ZC2HC1C       | 17.7 | 10.9 | 6.2  | 8.5  | 2.1 | 3.3E-02 |
| ILMN_1805192 | ITPRIP        | 4.1  | 2.1  | 1.8  | 2.0  | 2.1 | 2.4E-02 |
| ILMN_3237956 | ZC3H12C       | 20.3 | 11.5 | 8.0  | 9.8  | 2.1 | 1.2E-02 |
| ILMN_1678075 | CDYL          | 16.2 | 8.2  | 7.4  | 7.8  | 2.1 | 2.3E-02 |
| ILMN_1702763 | ZMYM1         | 20.0 | 11.3 | 8.0  | 9.7  | 2.1 | 1.4E-02 |
| ILMN_1720926 | PSMD5         | 20.1 | 13.0 | 6.5  | 9.7  | 2.1 | 1.8E-02 |
| ILMN_2323944 | FAM110A       | 17.9 | 11.1 | 6.3  | 8.7  | 2.1 | 2.4E-02 |
| ILMN_1695847 | ZKSCAN5       | 16.0 | 8.9  | 6.6  | 7.7  | 2.1 | 1.4E-02 |
| ILMN_1695357 | SPDL1         | 19.9 | 11.4 | 7.9  | 9.6  | 2.1 | 1.7E-02 |
| ILMN_3235647 | SIK1          | 18.6 | 12.3 | 5.7  | 9.0  | 2.1 | 2.4E-02 |
| ILMN_1672135 | ZNF615        | 8.3  | 3.9  | 4.1  | 4.0  | 2.1 | 2.0E-02 |
| ILMN_1793543 | C1orf51       | 8.2  | 3.8  | 4.2  | 4.0  | 2.1 | 3.3E-02 |
| ILMN_3244176 | RP11-166D19.1 | 14.3 | 5.2  | 8.7  | 7.0  | 2.1 | 3.8E-02 |
| ILMN_1702691 | TNFAIP3       | 16.7 | 10.4 | 5.9  | 8.1  | 2.1 | 3.8E-02 |
| ILMN_1676010 | SP1           | 11.1 | 6.3  | 4.6  | 5.4  | 2.1 | 4.2E-02 |
| ILMN_2182647 | PINX1         | 21.1 | 11.2 | 9.4  | 10.3 | 2.1 | 1.3E-02 |
| ILMN_1755850 | ZNF350        | 12.4 | 6.3  | 5.9  | 6.1  | 2.0 | 3.1E-02 |
| ILMN_1742738 | LURAP1        | 16.4 | 8.8  | 7.2  | 8.0  | 2.0 | 2.0E-02 |

|              |               |      |      |      |      |     |         |
|--------------|---------------|------|------|------|------|-----|---------|
| ILMN_2205032 | MAGEE1        | 14.5 | 6.4  | 7.8  | 7.1  | 2.0 | 3.3E-02 |
| ILMN_2317730 | ELMO2         | 12.0 | 5.2  | 6.6  | 5.9  | 2.0 | 4.6E-02 |
| ILMN_2250923 | FOXP1         | 18.9 | 10.6 | 7.8  | 9.2  | 2.0 | 1.8E-02 |
| ILMN_2413041 | TEAD4         | 17.7 | 9.3  | 8.0  | 8.7  | 2.0 | 1.8E-02 |
| ILMN_1679891 | NAF1          | 20.5 | 12.1 | 8.0  | 10.0 | 2.0 | 1.4E-02 |
| ILMN_1682139 | RAI14         | 21.8 | 8.9  | 12.4 | 10.7 | 2.0 | 5.2E-03 |
| ILMN_1791002 | SKP2          | 20.7 | 13.9 | 6.3  | 10.1 | 2.0 | 1.8E-02 |
| ILMN_1793578 | ZFP37         | 6.8  | 3.3  | 3.3  | 3.3  | 2.0 | 1.8E-02 |
| ILMN_1791057 | IFNAR2        | 21.1 | 9.4  | 11.3 | 10.3 | 2.0 | 9.2E-03 |
| ILMN_1740490 | ZFP82         | 8.9  | 4.1  | 4.6  | 4.3  | 2.0 | 4.0E-02 |
| ILMN_2230577 | KCTD7         | 13.2 | 6.6  | 6.3  | 6.5  | 2.0 | 3.5E-02 |
| ILMN_2230577 | RABGEF1       | 13.2 | 6.6  | 6.3  | 6.5  | 2.0 | 3.5E-02 |
| ILMN_1677785 | ZNF559        | 13.8 | 7.1  | 6.4  | 6.8  | 2.0 | 1.4E-02 |
| ILMN_1783728 | TBRG4         | 11.0 | 6.2  | 4.6  | 5.4  | 2.0 | 3.7E-02 |
| ILMN_1686968 | AL513327.1    | 12.2 | 5.1  | 6.8  | 6.0  | 2.0 | 2.4E-02 |
| ILMN_1686968 | ZNF362        | 12.2 | 5.1  | 6.8  | 6.0  | 2.0 | 2.4E-02 |
| ILMN_1703926 | PTGER2        | 12.3 | 5.3  | 6.8  | 6.0  | 2.0 | 2.0E-02 |
| ILMN_1811972 | MYCBP2        | 17.0 | 7.4  | 9.4  | 8.4  | 2.0 | 1.8E-02 |
| ILMN_1718900 | KCTD2         | 22.8 | 10.0 | 12.5 | 11.2 | 2.0 | 2.2E-03 |
| ILMN_2176931 | PELI3         | 19.8 | 10.3 | 9.2  | 9.8  | 2.0 | 7.1E-03 |
| ILMN_1683082 | RPUSD1        | 15.8 | 10.0 | 5.6  | 7.8  | 2.0 | 4.5E-02 |
| ILMN_1753482 | FAM86C1       | 17.1 | 6.3  | 10.6 | 8.4  | 2.0 | 2.0E-02 |
| ILMN_2119535 | RIPK1         | 9.9  | 5.4  | 4.3  | 4.9  | 2.0 | 3.0E-02 |
| ILMN_1726153 | MIR4435-1HG   | 14.7 | 9.7  | 4.9  | 7.3  | 2.0 | 4.1E-02 |
| ILMN_2369603 | CPEB1         | 22.2 | 10.8 | 11.2 | 11.0 | 2.0 | 3.5E-03 |
| ILMN_2370208 | CMTM3         | 22.0 | 8.1  | 13.6 | 10.9 | 2.0 | 5.6E-03 |
| ILMN_1704637 | TRMT44        | 22.1 | 13.5 | 8.3  | 10.9 | 2.0 | 3.4E-03 |
| ILMN_1781198 | PPP1R3D       | 11.0 | 5.9  | 5.0  | 5.4  | 2.0 | 2.1E-02 |
| ILMN_1661695 | IRAK3         | 15.8 | 5.5  | 10.2 | 7.8  | 2.0 | 1.5E-02 |
| ILMN_1677404 | RAP2A         | 21.5 | 11.6 | 9.8  | 10.7 | 2.0 | 1.6E-02 |
| ILMN_1654357 | ZNF24         | 18.0 | 11.9 | 5.9  | 8.9  | 2.0 | 3.1E-02 |
| ILMN_1808047 | PHC2          | 8.2  | 4.5  | 3.6  | 4.1  | 2.0 | 2.3E-02 |
| ILMN_1725312 | RASA1         | 13.0 | 5.7  | 7.2  | 6.5  | 2.0 | 1.8E-02 |
| ILMN_1703487 | LMO4          | 20.7 | 8.1  | 12.5 | 10.3 | 2.0 | 9.1E-03 |
| ILMN_2415421 | SLC30A2       | 16.3 | 6.8  | 9.4  | 8.1  | 2.0 | 4.2E-02 |
| ILMN_1752510 | FAM13A        | 14.8 | 7.8  | 6.9  | 7.4  | 2.0 | 3.7E-02 |
| ILMN_2283196 | ZSWIM3        | 18.0 | 11.3 | 6.6  | 9.0  | 2.0 | 1.9E-02 |
| ILMN_1719064 | KCTD10        | 11.6 | 6.8  | 4.7  | 5.7  | 2.0 | 4.5E-02 |
| ILMN_1698038 | INMT-FAM188B  | 24.0 | 9.0  | 14.9 | 11.9 | 2.0 | 3.6E-03 |
| ILMN_1698038 | FAM188B       | 24.0 | 9.0  | 14.9 | 11.9 | 2.0 | 3.6E-03 |
| ILMN_2341254 | STARD13       | 4.4  | 2.1  | 2.3  | 2.2  | 2.0 | 2.3E-02 |
| ILMN_1749424 | SSR4P1        | 15.8 | 8.8  | 7.0  | 7.9  | 2.0 | 2.5E-02 |
| ILMN_1730794 | SERTAD4       | 21.8 | 7.4  | 14.3 | 10.8 | 2.0 | 1.3E-02 |
| ILMN_1679929 | KLF13         | 5.4  | 2.7  | 2.7  | 2.7  | 2.0 | 2.2E-02 |
| ILMN_1690241 | BATF2         | 21.4 | 11.5 | 9.7  | 10.6 | 2.0 | 3.7E-03 |
| ILMN_2414848 | TBRG4         | 12.1 | 7.4  | 4.7  | 6.0  | 2.0 | 2.0E-02 |
| ILMN_2197247 | POLR3A        | 11.2 | 6.3  | 4.9  | 5.6  | 2.0 | 4.2E-02 |
| ILMN_1719202 | ZNF174        | 17.1 | 10.3 | 6.8  | 8.5  | 2.0 | 4.0E-02 |
| ILMN_3308118 | RP11-166D19.1 | 15.4 | 7.0  | 8.3  | 7.7  | 2.0 | 2.5E-02 |
| ILMN_3308118 | MIR125B1      | 15.4 | 7.0  | 8.3  | 7.7  | 2.0 | 2.5E-02 |
| ILMN_1783910 | TRAF6         | 15.9 | 8.9  | 6.9  | 7.9  | 2.0 | 3.6E-02 |
| ILMN_2314007 | TCF12         | 19.7 | 10.7 | 9.0  | 9.8  | 2.0 | 1.8E-02 |
| ILMN_1656373 | BNC2          | 7.4  | 3.6  | 3.7  | 3.7  | 2.0 | 1.4E-02 |
| ILMN_1692145 | ZNF14         | 6.7  | 12.0 | 14.9 | 13.4 | 0.5 | 4.6E-02 |
| ILMN_1689552 | FAM63A        | 11.1 | 20.6 | 24.0 | 22.3 | 0.5 | 1.3E-02 |
| ILMN_2399310 | MLLT10        | 9.5  | 17.7 | 22.5 | 20.1 | 0.5 | 1.5E-02 |
| ILMN_2371590 | DDX17         | 10.1 | 19.5 | 24.0 | 21.7 | 0.5 | 1.8E-02 |
| ILMN_3243664 | NPIP11        | 8.2  | 14.2 | 22.6 | 18.4 | 0.4 | 2.0E-02 |

|              |         |     |      |      |      |     |         |
|--------------|---------|-----|------|------|------|-----|---------|
| ILMN_2196347 | CDKN1B  | 6.5 | 16.8 | 13.5 | 15.1 | 0.4 | 1.7E-02 |
| ILMN_2412380 | TSC22D1 | 3.9 | 11.5 | 10.8 | 11.1 | 0.4 | 3.7E-02 |
| ILMN_1680279 | USP49   | 7.0 | 19.8 | 21.9 | 20.8 | 0.3 | 2.1E-03 |
